# Supplementary material for: Three-component domino reactions providing rapid and efficient routes to fully substituted pyrroles
Source: Royal Society of Chemistry journal article supplement (doi:10.1039/c3ra40252e), 2013-01-01
Supplement: c3ra40252e.pdf [file c3ra40252e.pdf]

## *Supporting Information for*

### Three-component domino reactions providing rapid and efficient routes to fully substituted pyrroles

*Jia-Yan Liu, Qiu-Yun Li, Bo Jiang,\* and Shu-Jiang Tu\**

School of Chemistry and Chemical Engineering, and Jiangsu Key Laboratory of Green Synthetic Chemistry for Functional Materials, Jiangsu Normal University, Jiangsu, P.R. China.

*E-mail:* [jiangchem@jsnu.edu.cn](mailto:jiangchem@jsnu.edu.cn) (B. Jiang); [laotu@jsnu.edu.cn](mailto:laotu@jsnu.edu.cn) (S.-J. Tu)

#### **Table of Contents**

Copies of <sup>1</sup>H and <sup>13</sup>C NMR Spectra for Compounds **4a-4x**----- S2-S25

Copies of <sup>1</sup>H and <sup>13</sup>C NMR Spectra for Compounds **6a-6y**----- S26-S50

Copies of <sup>1</sup>H NMR Spectra for Compounds **8a-8e**----- S51-S53

# Copies of Spectra for Products 4, 6 and 8

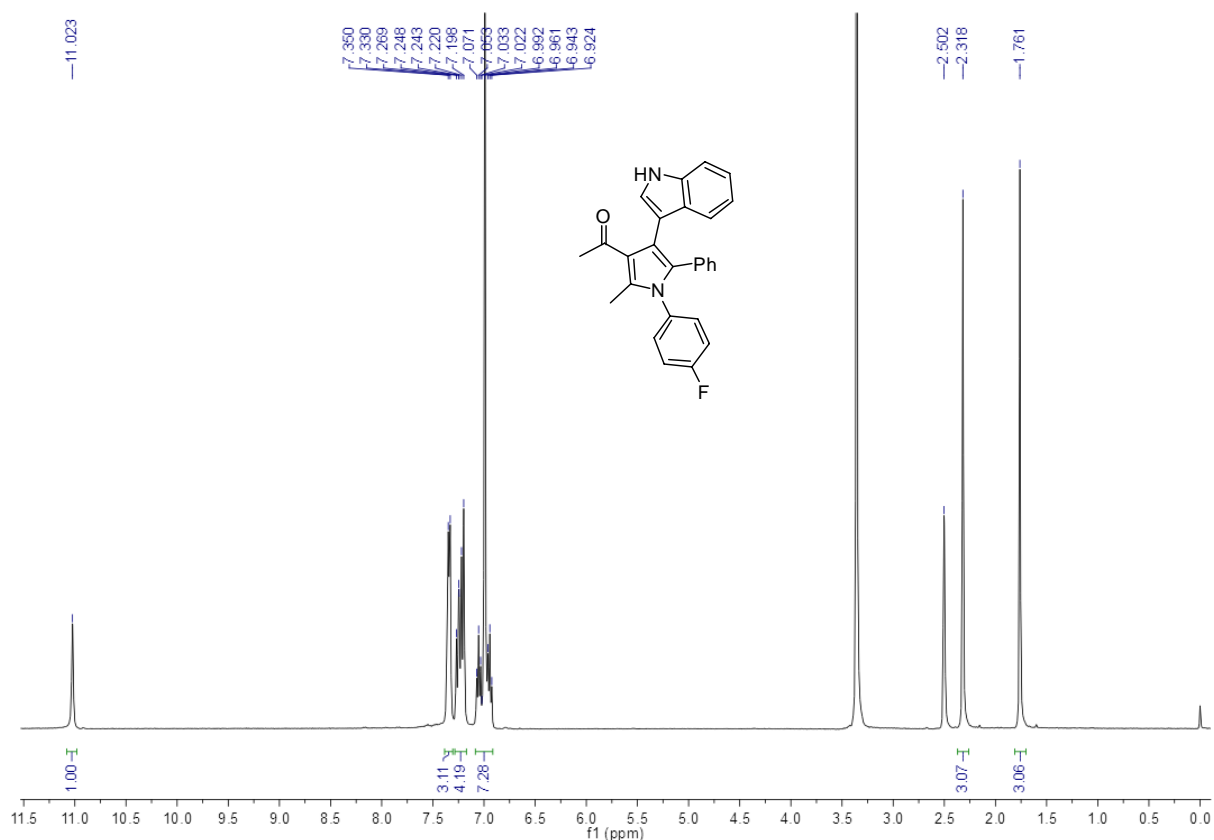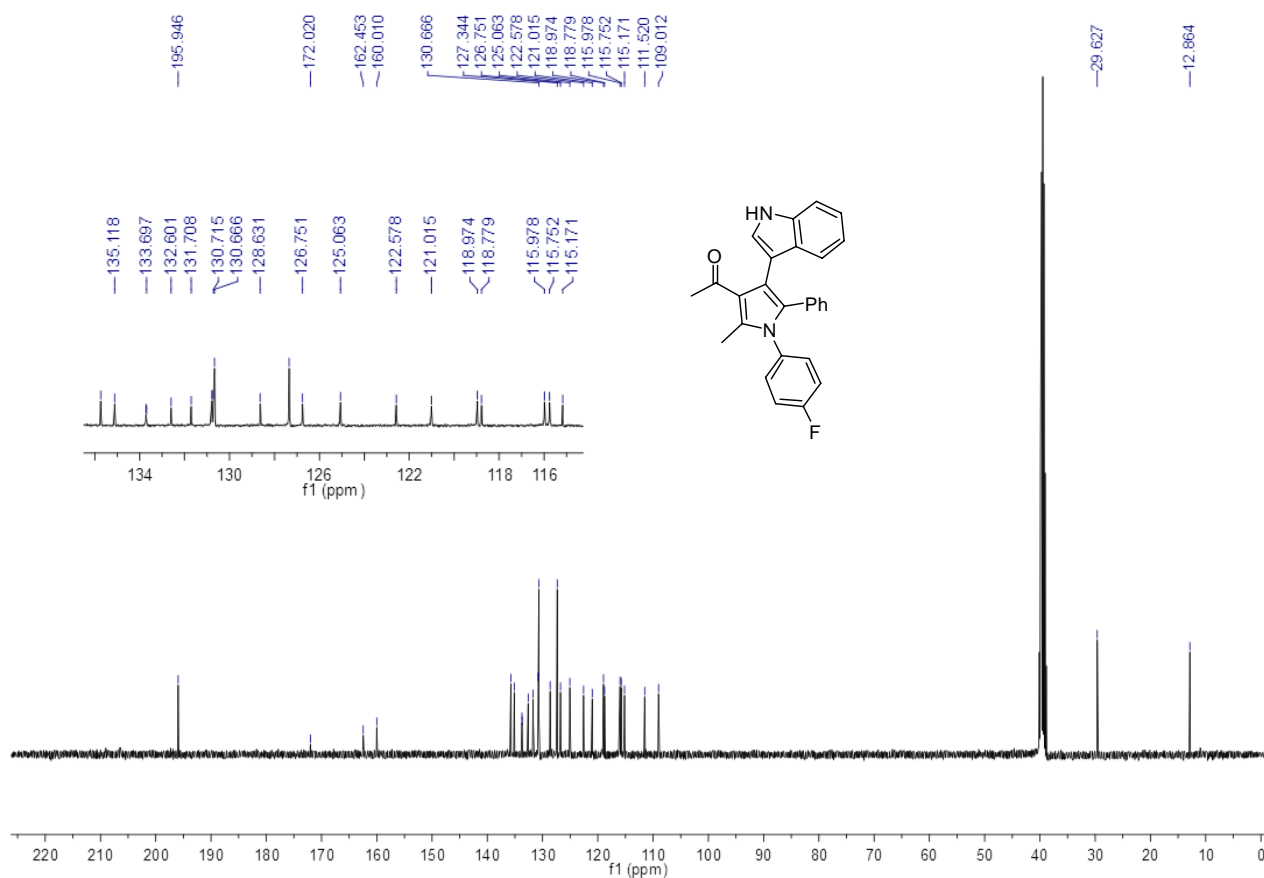

**<sup>13</sup>C NMR Spectrum of Compound 4a**

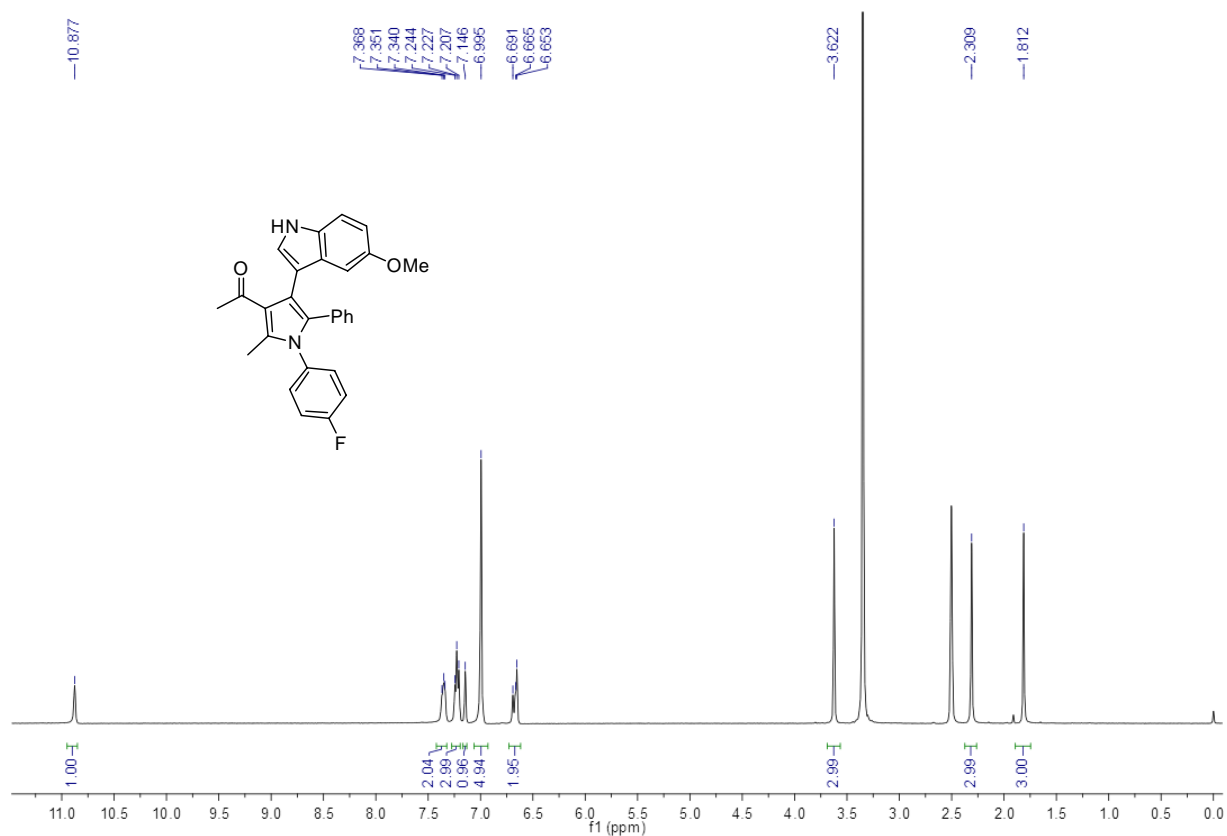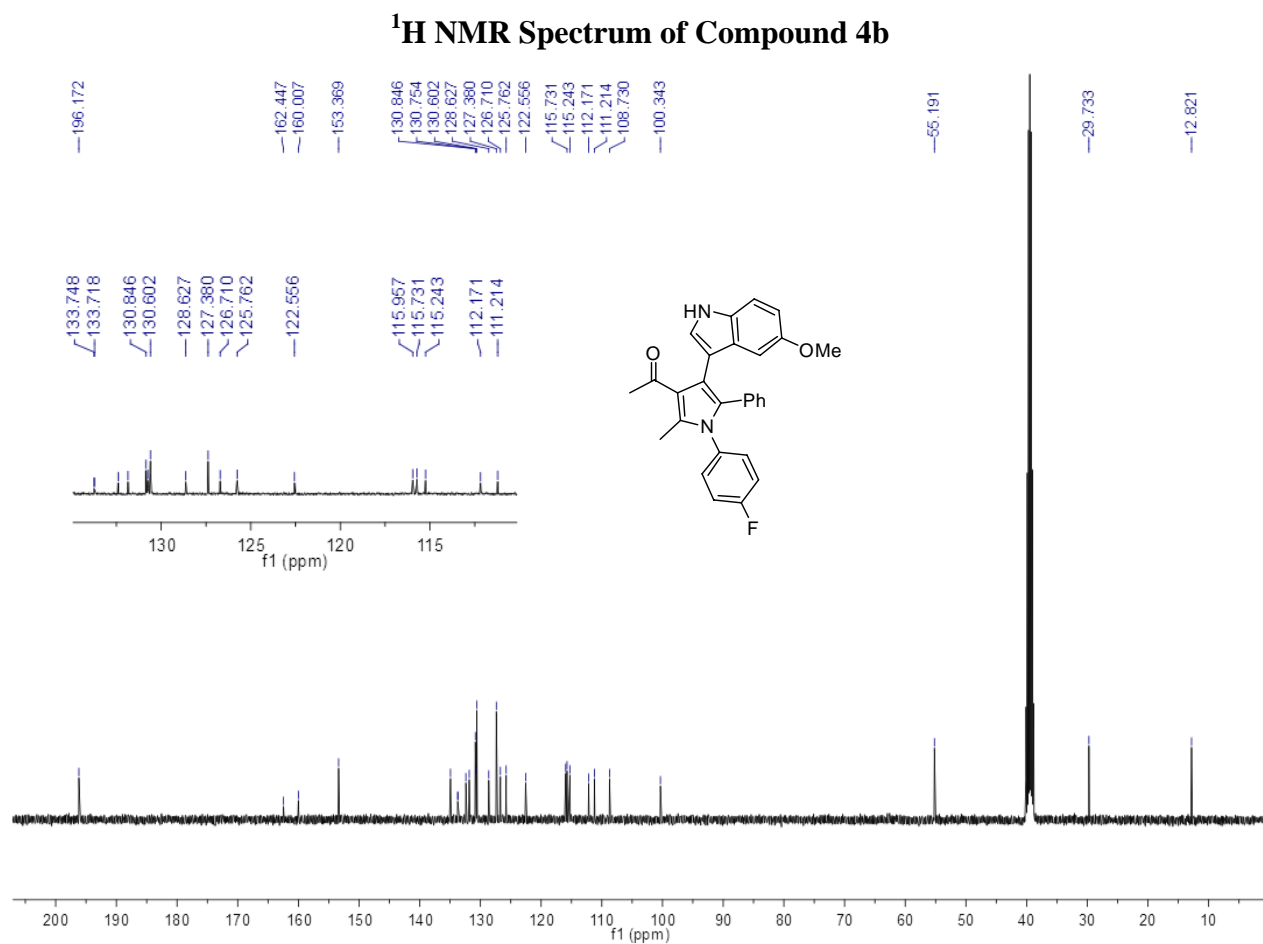

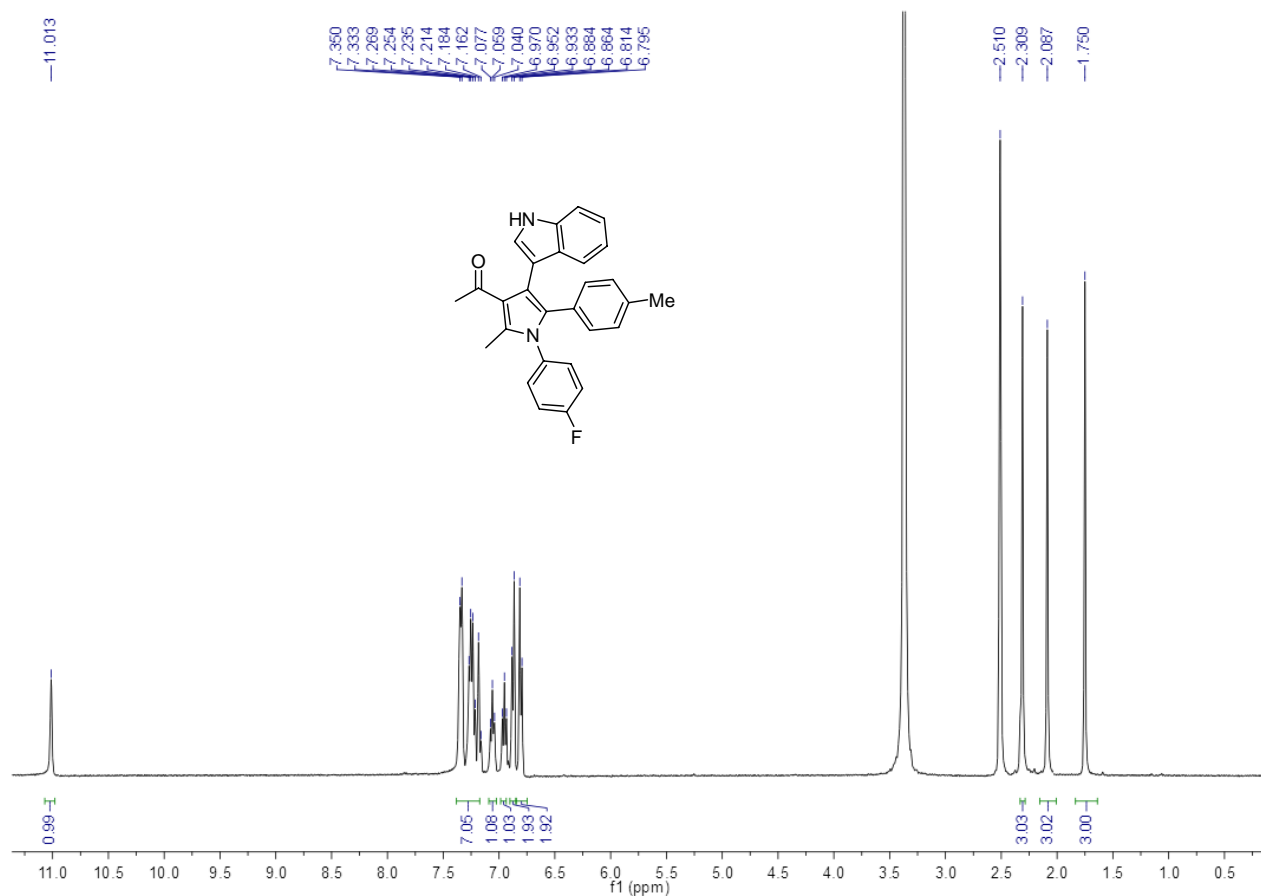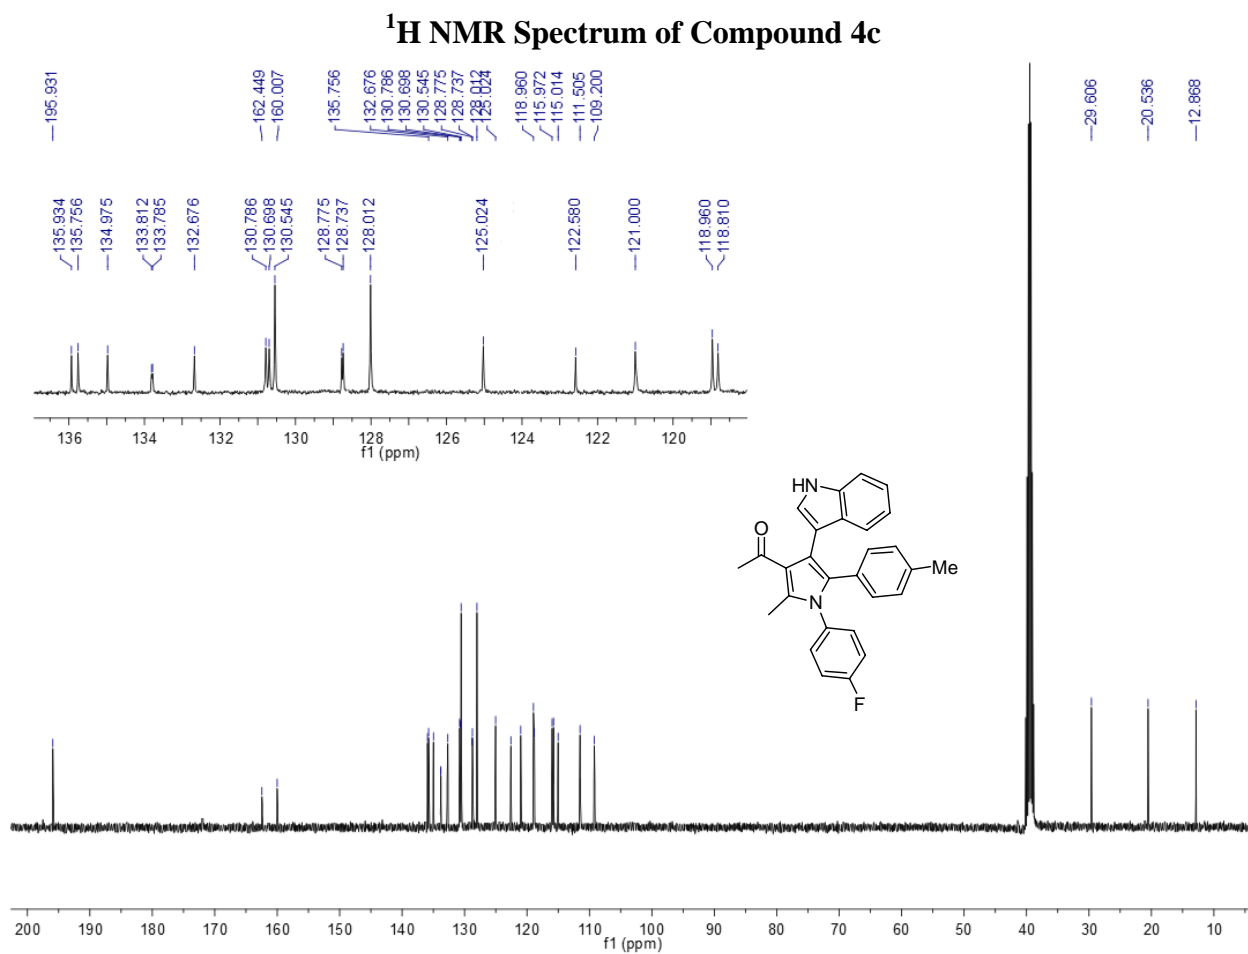

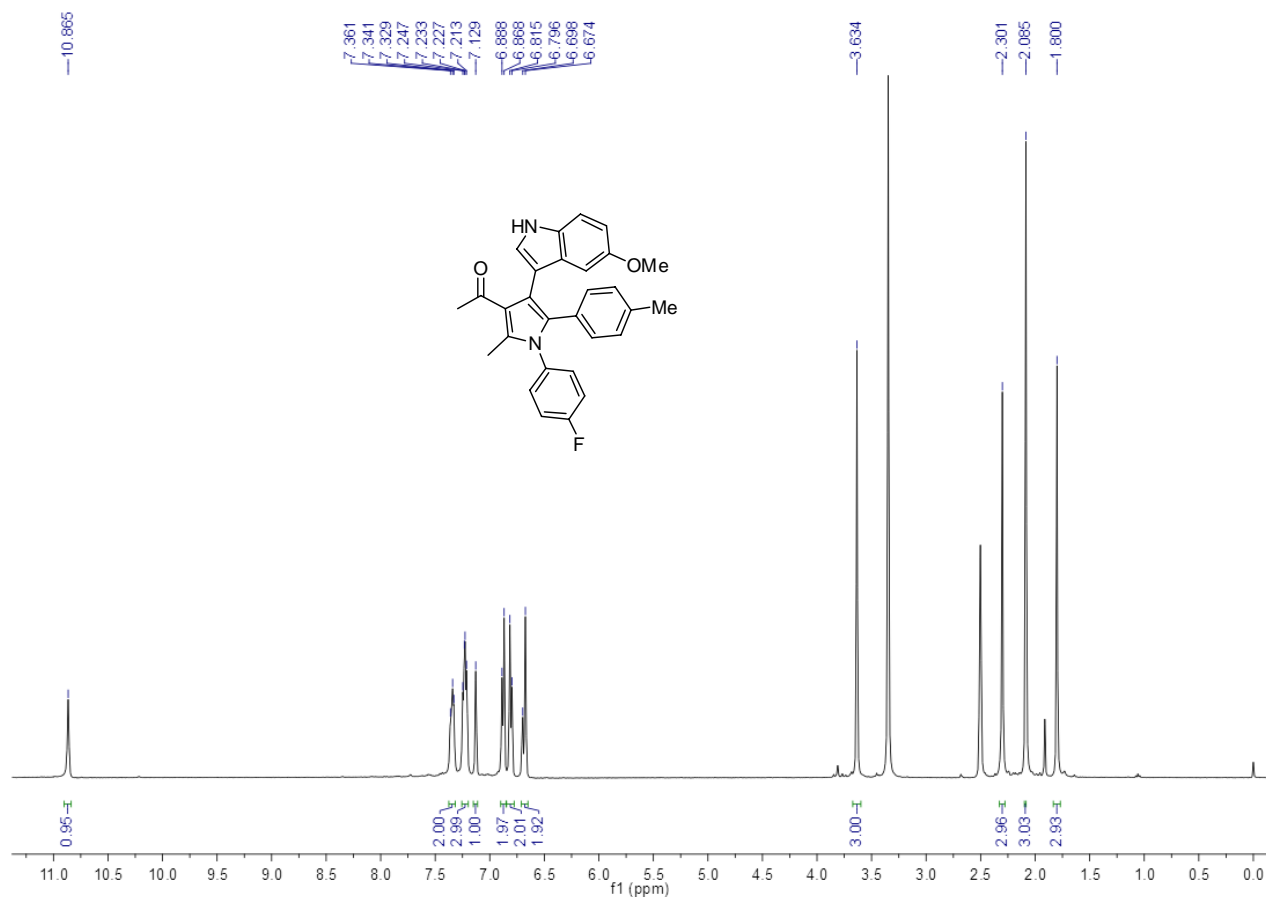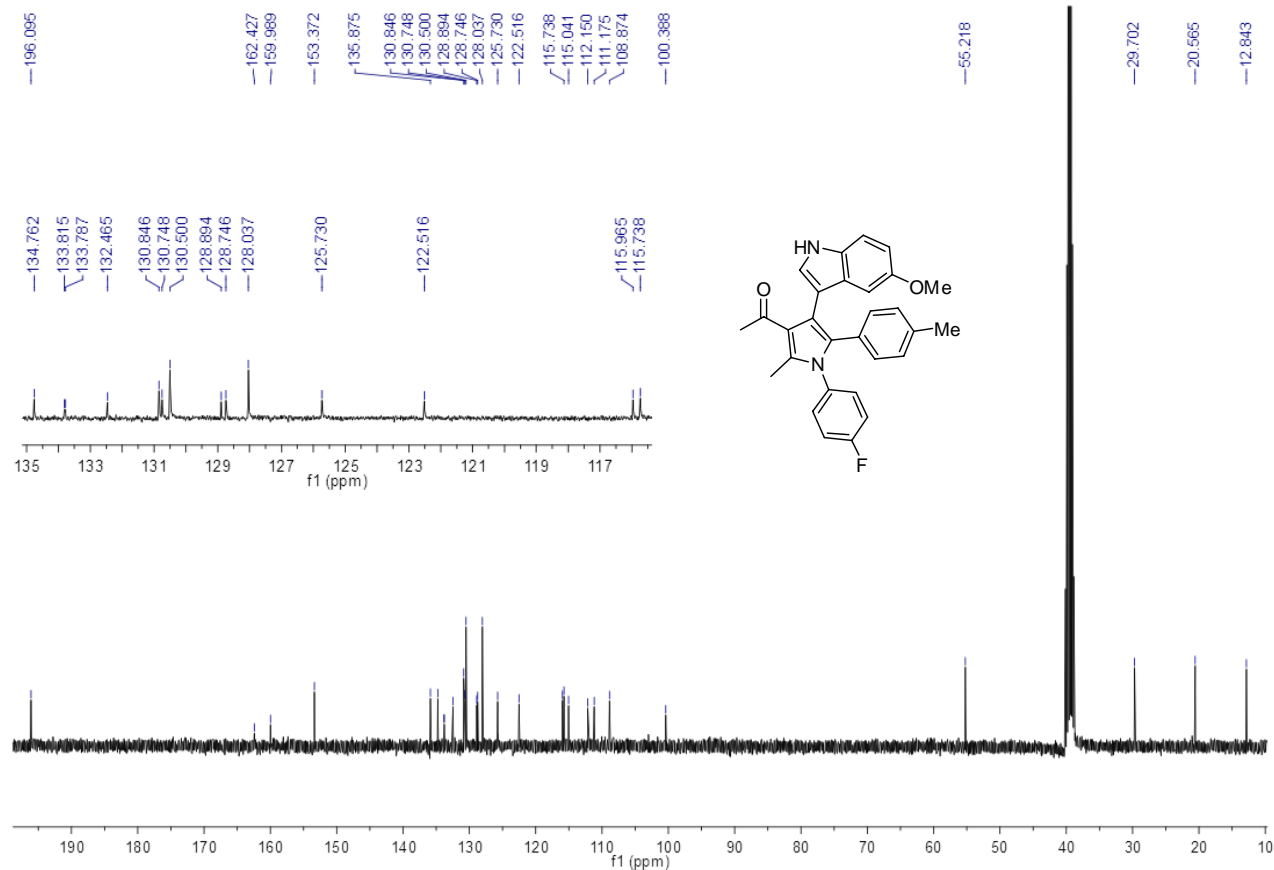

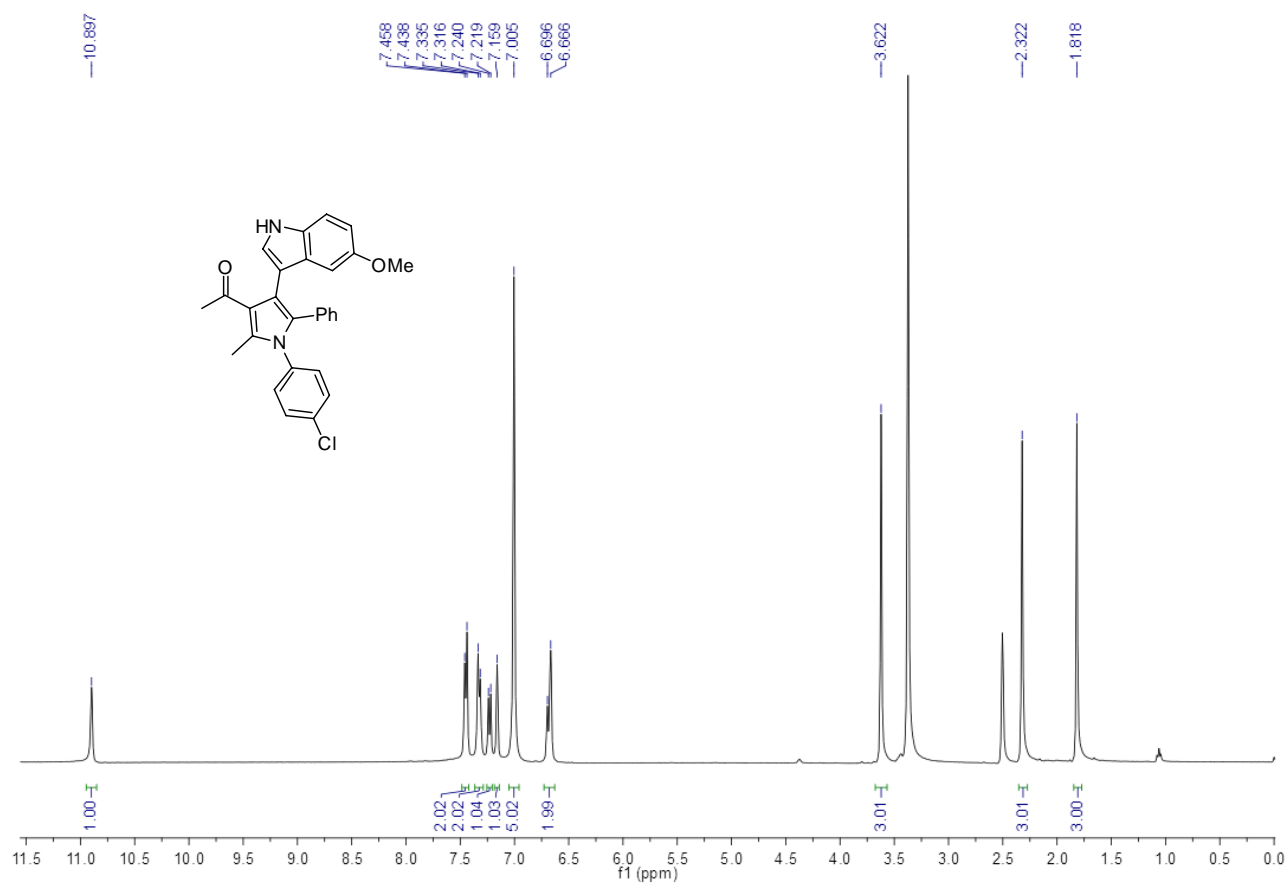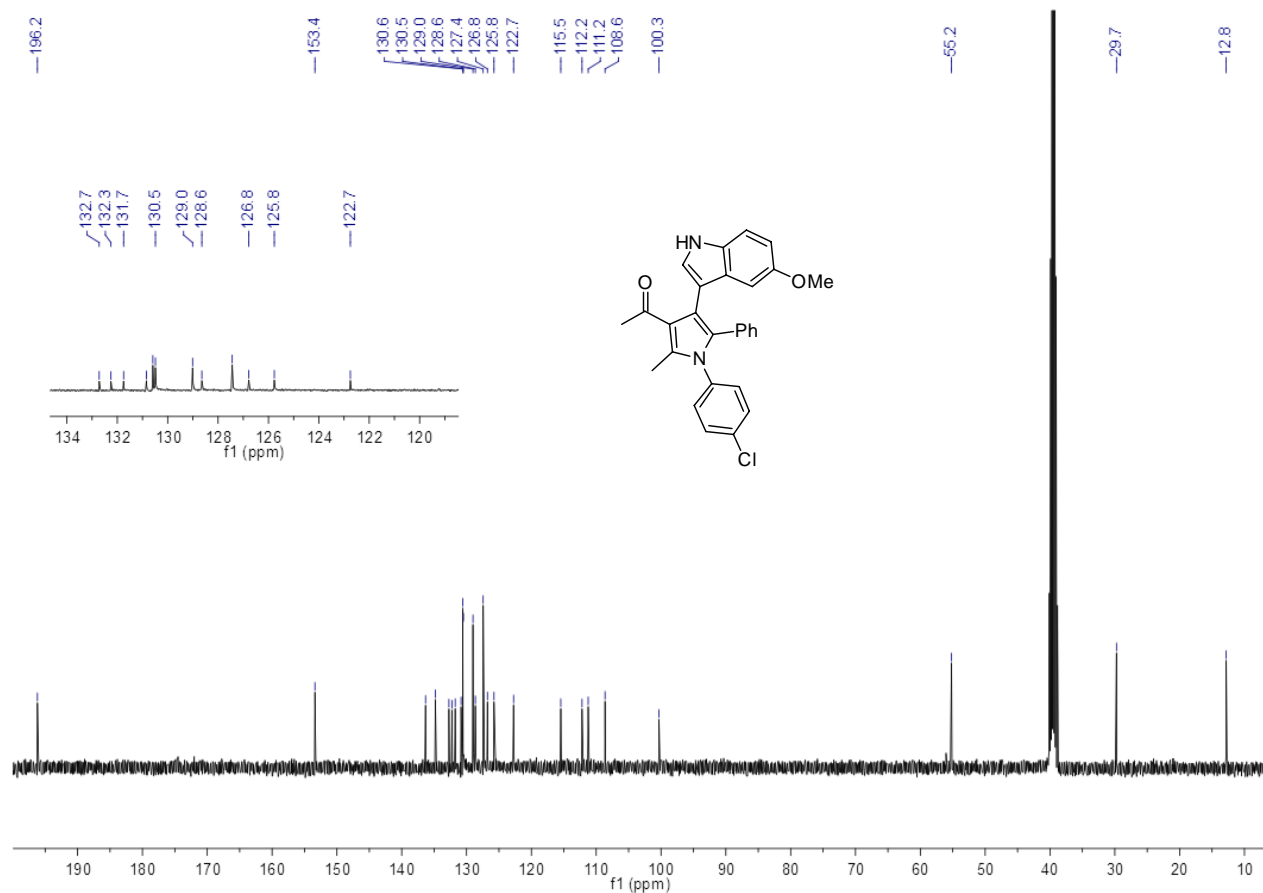

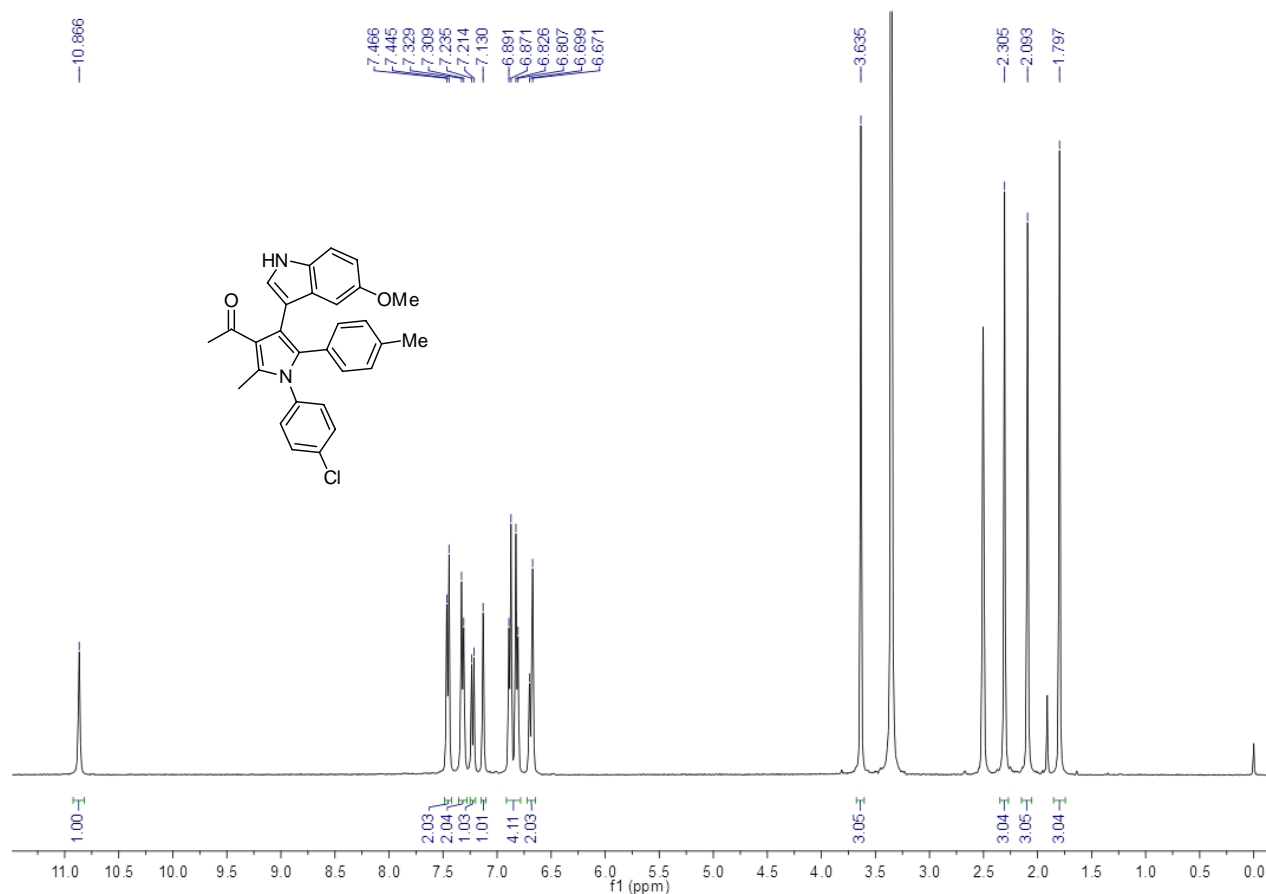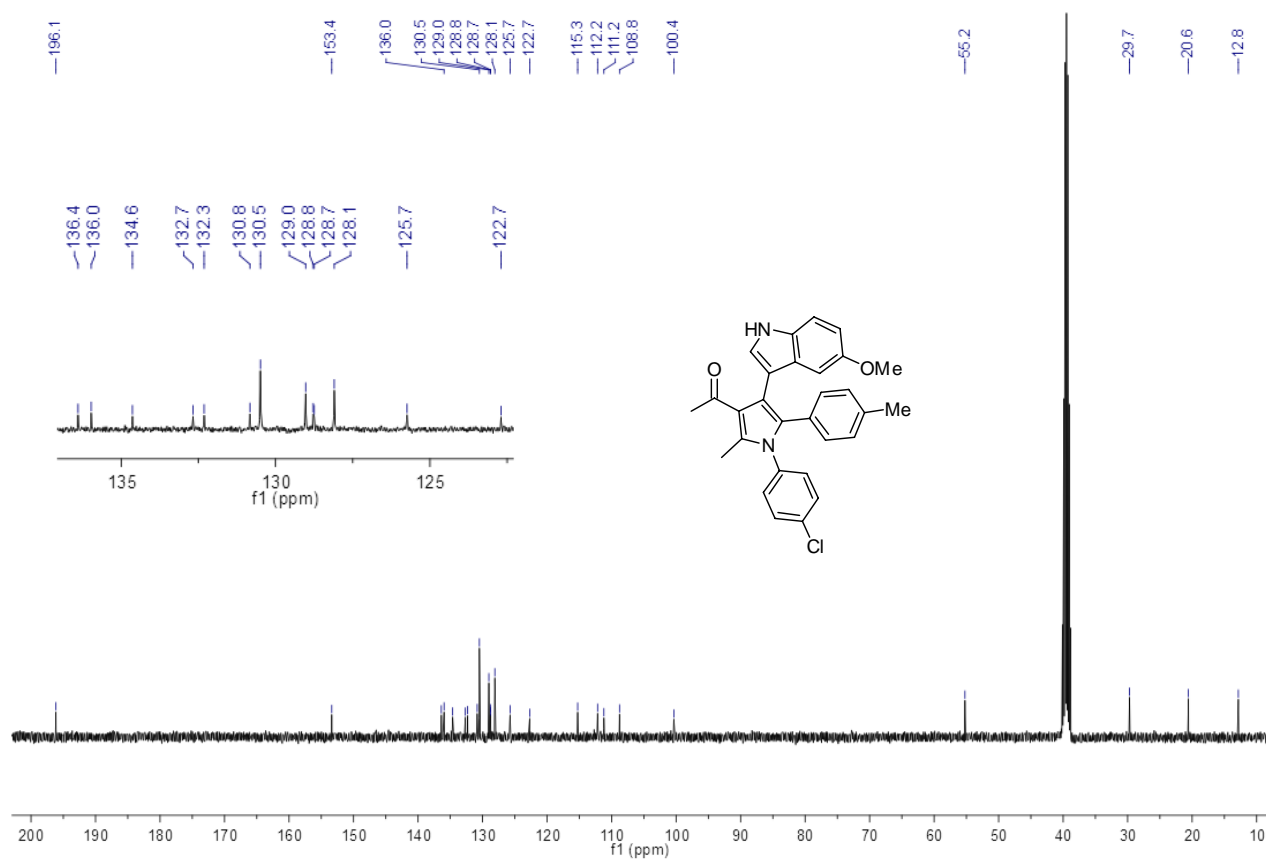

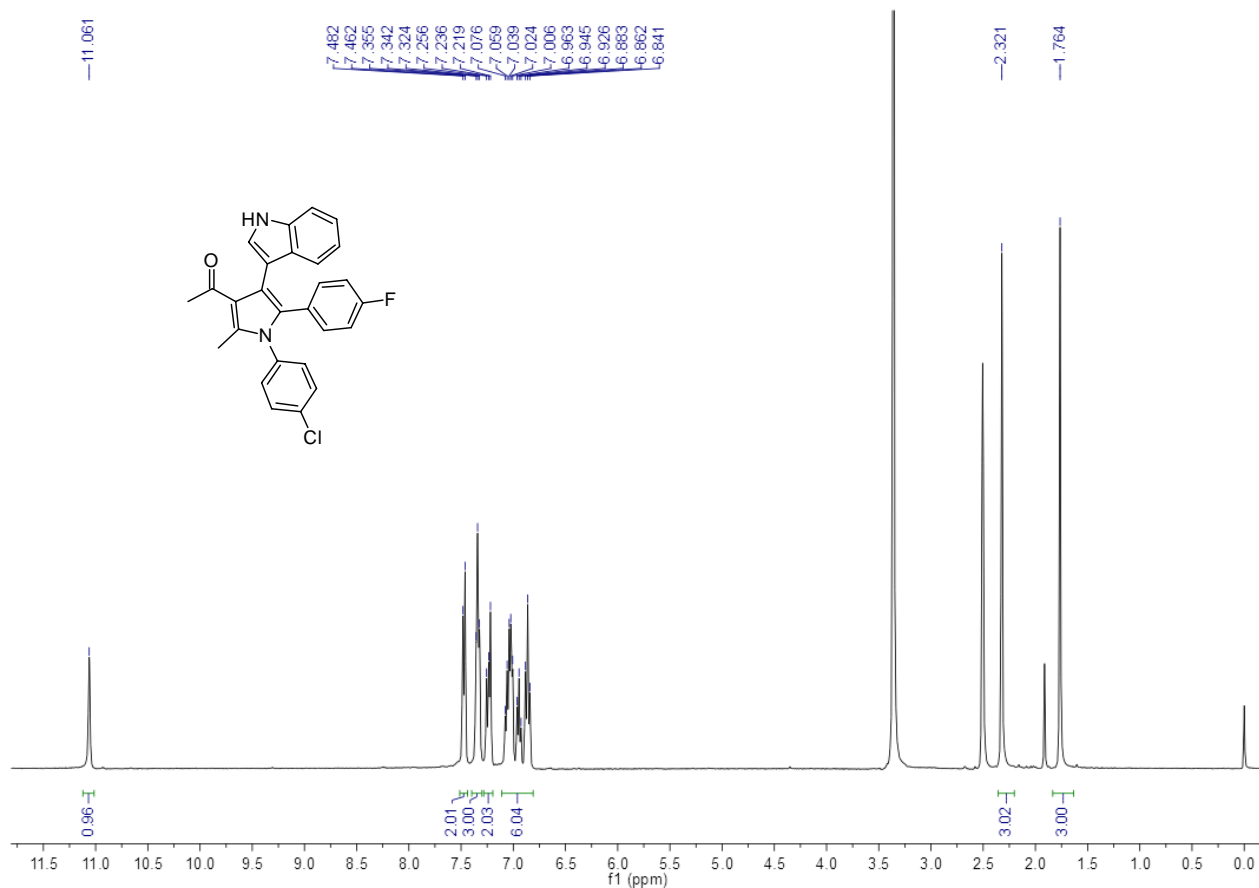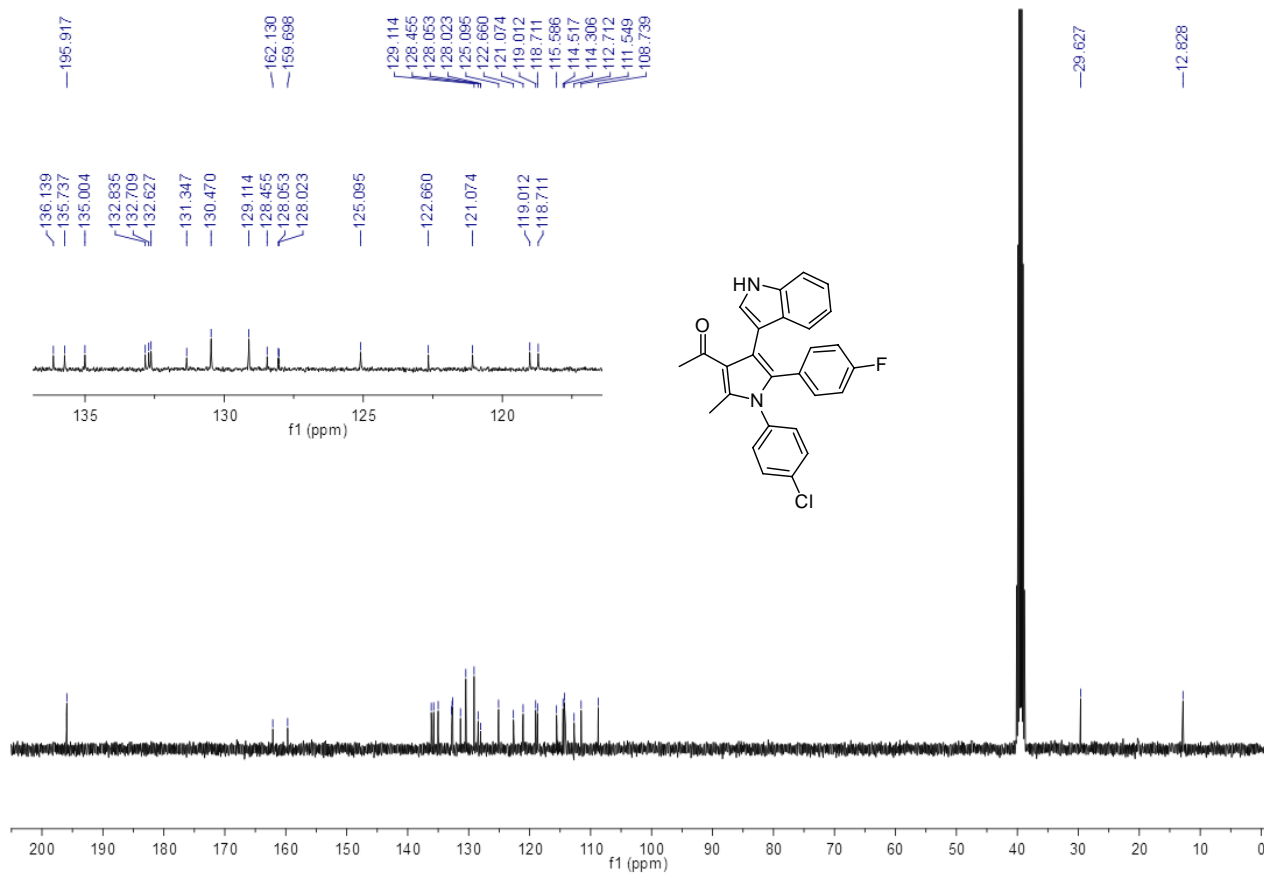

**<sup>13</sup>C NMR Spectrum of Compound 4g**



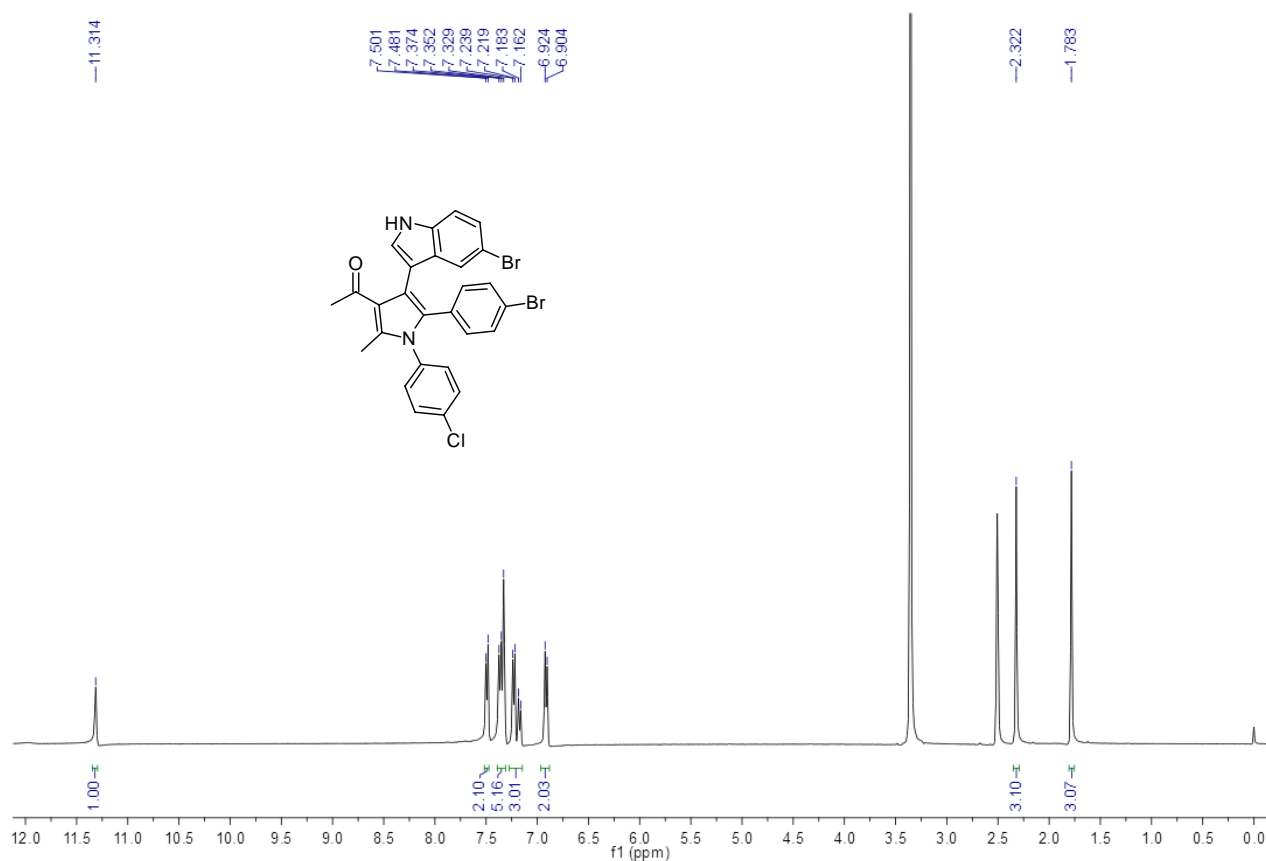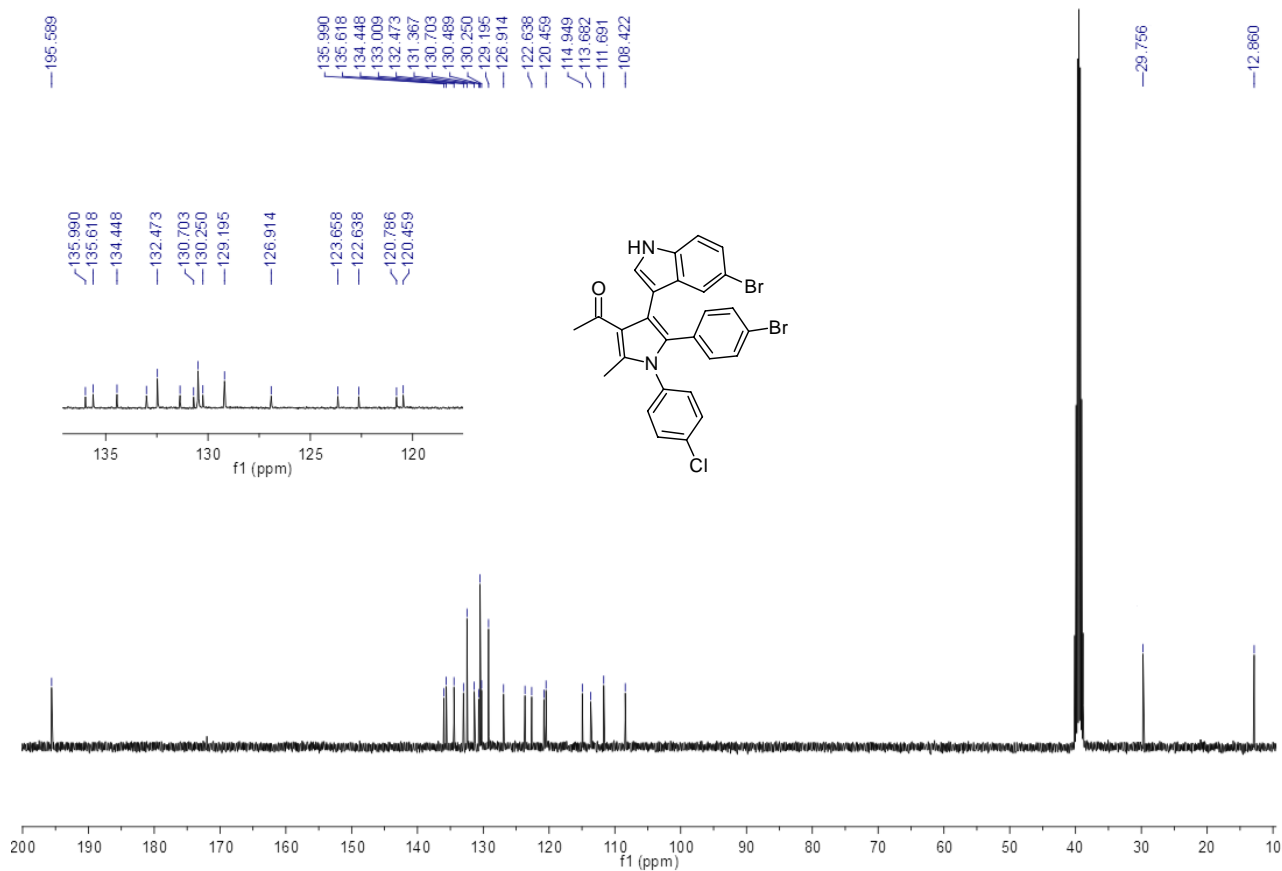

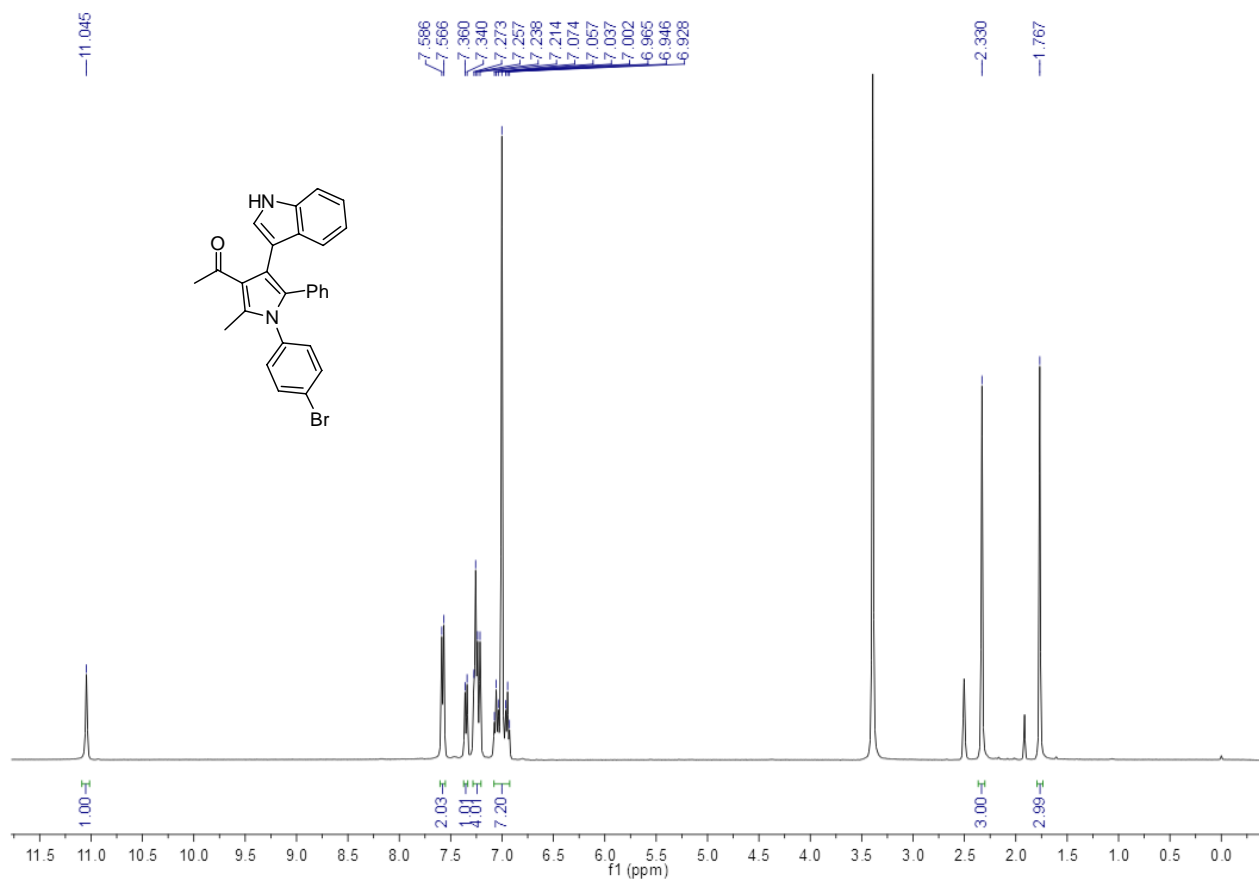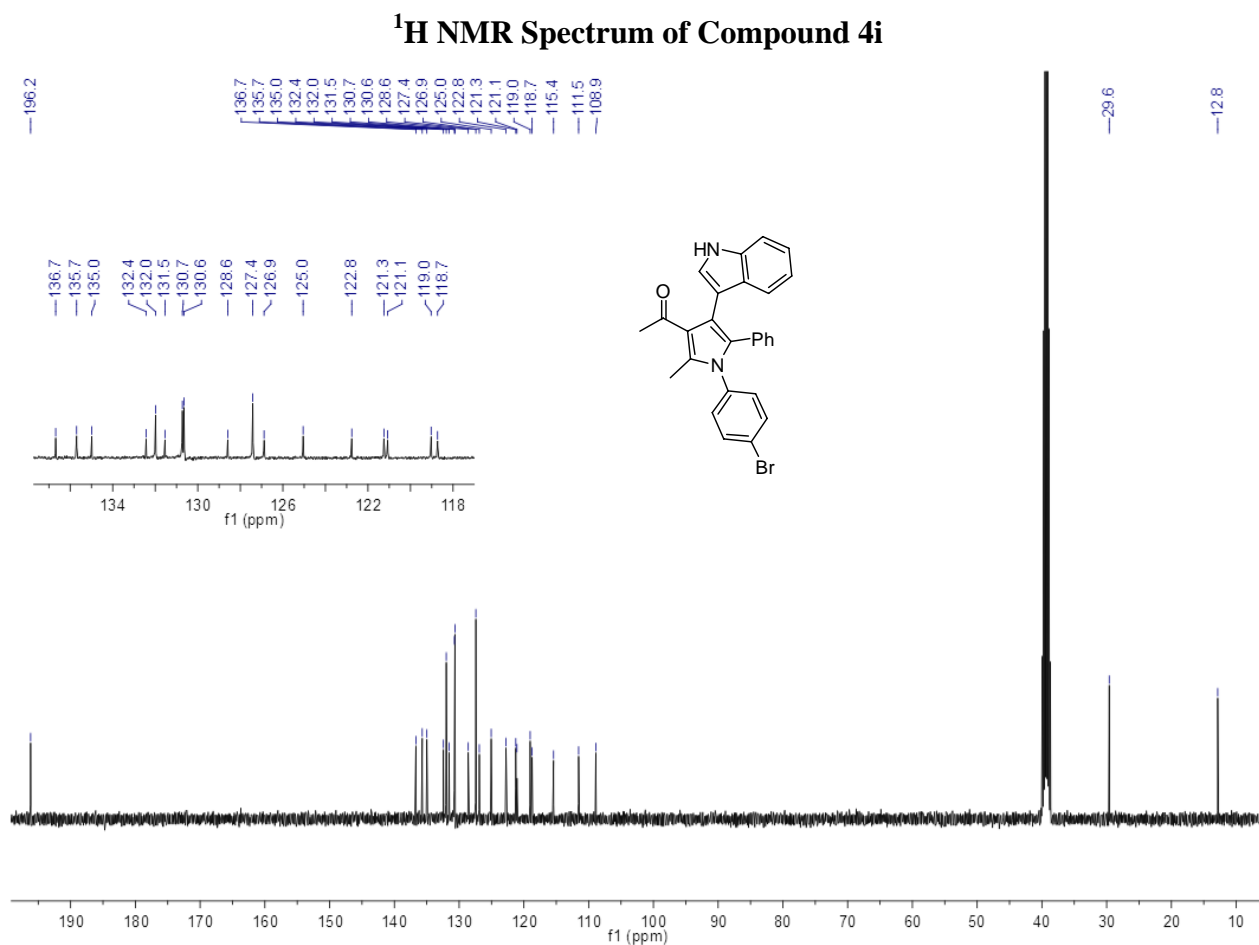

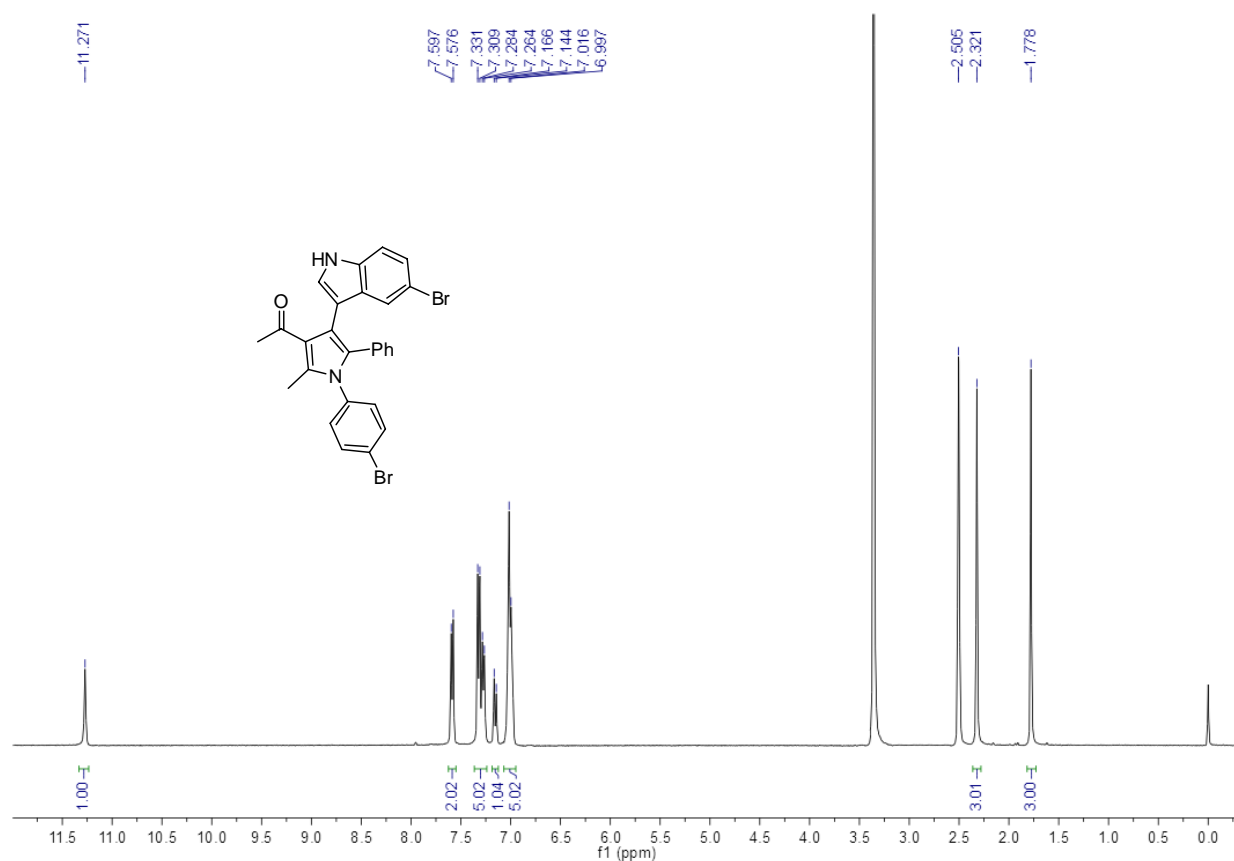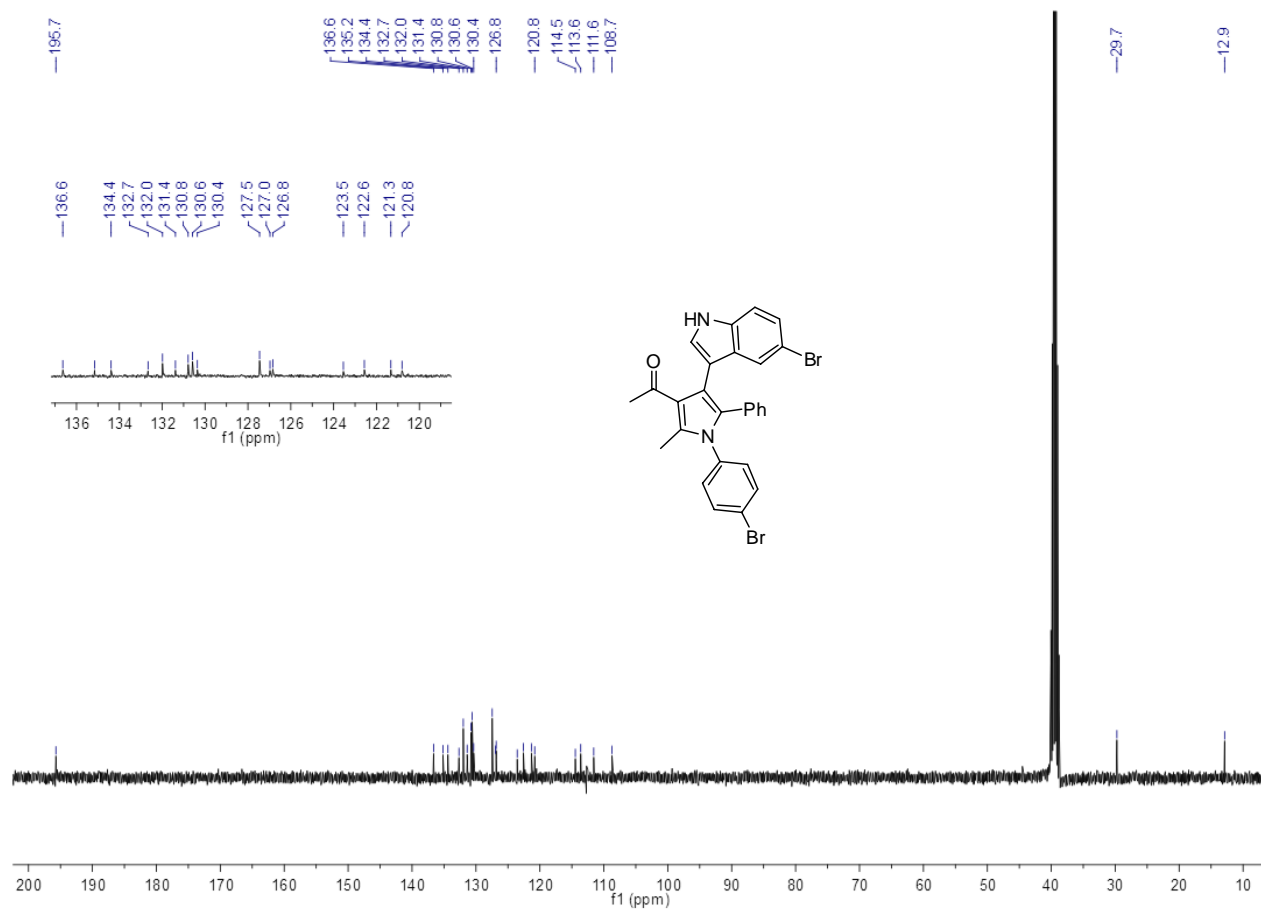

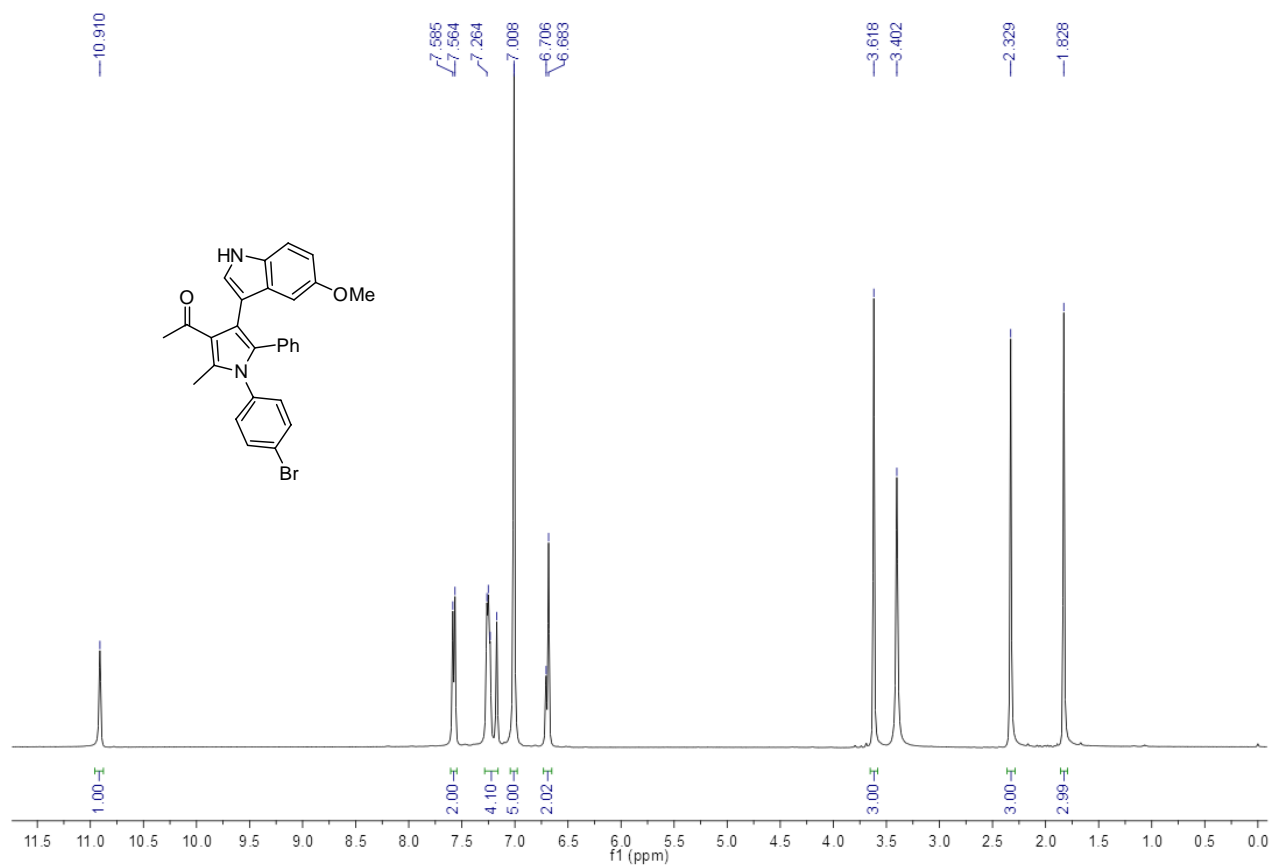

<sup>1</sup>H NMR Spectrum of Compound 4k

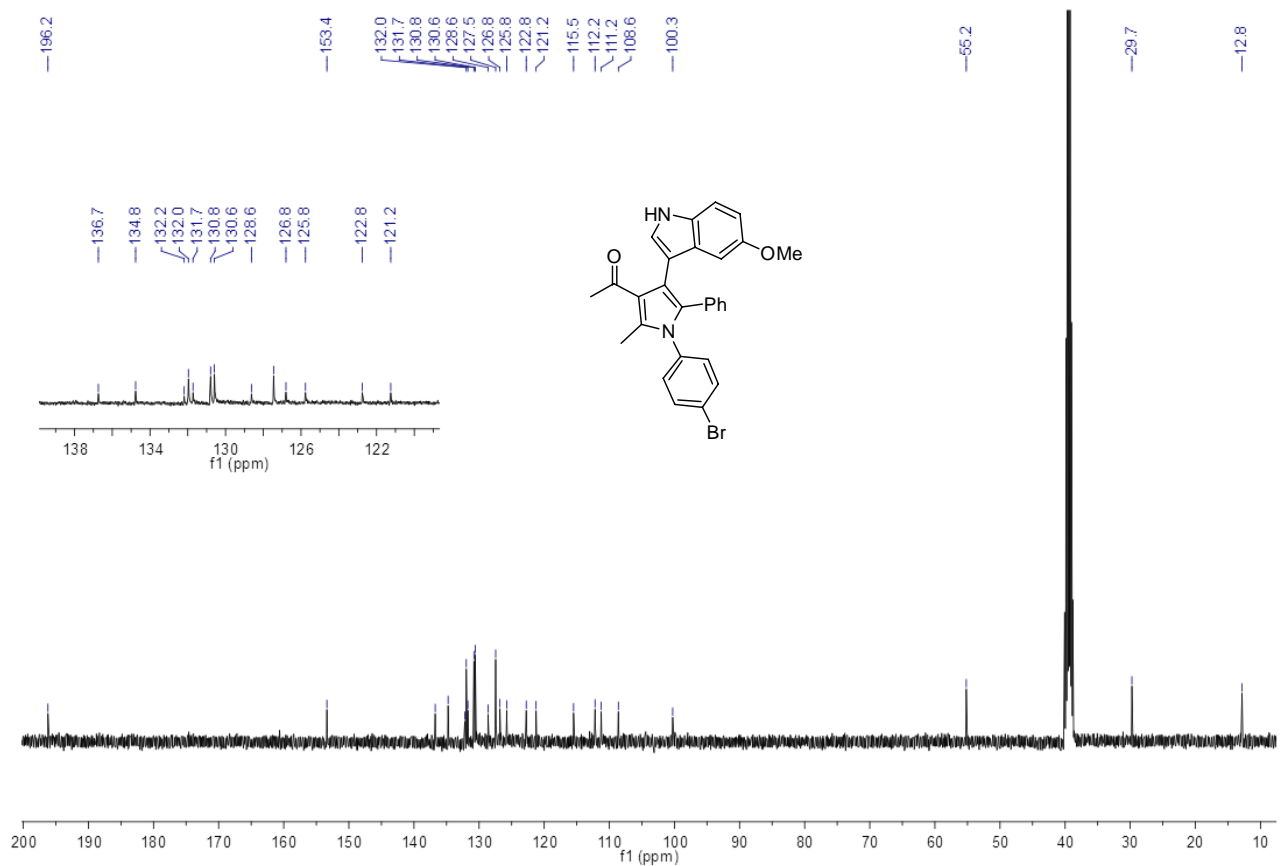

<sup>13</sup>C NMR Spectrum of Compound 4k

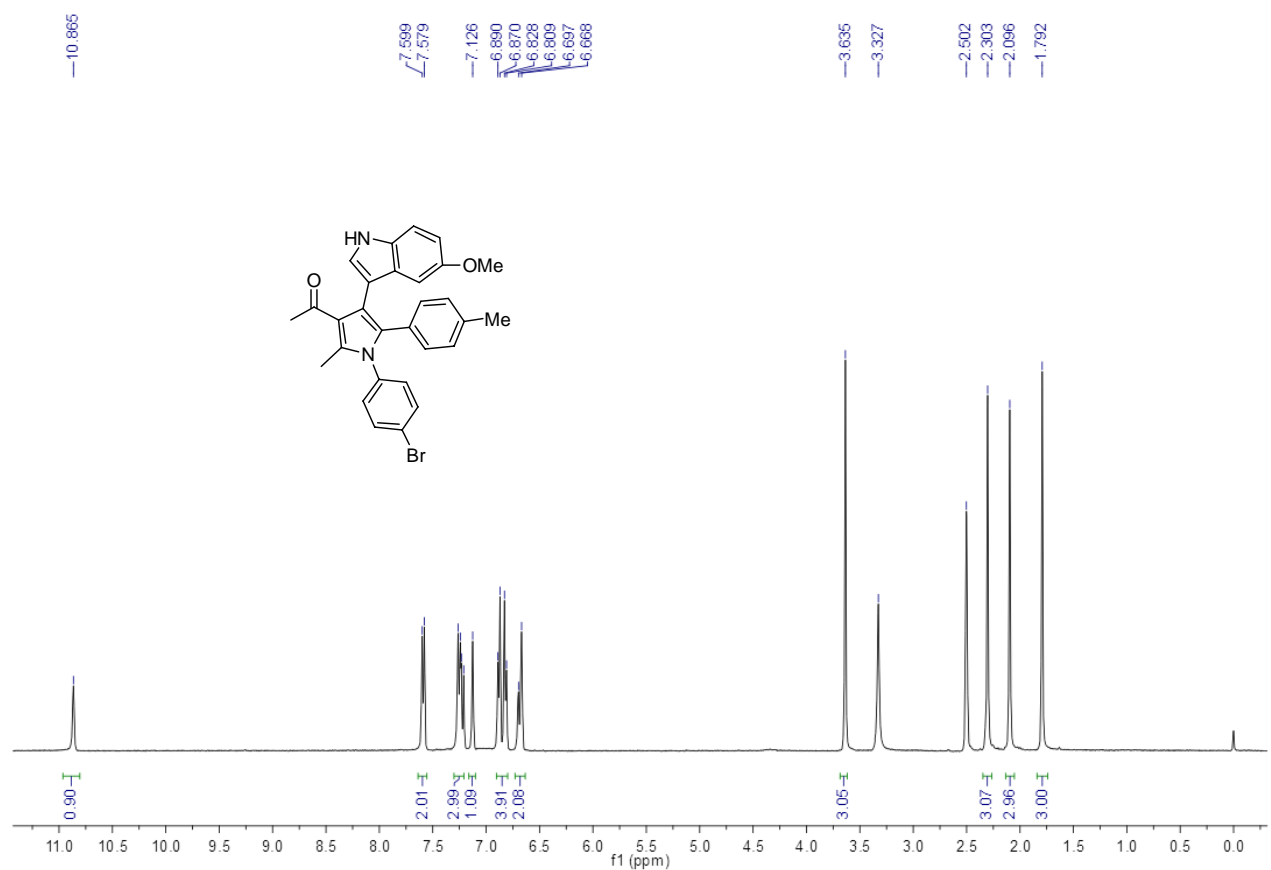

<sup>1</sup>H NMR Spectrum of Compound 4l

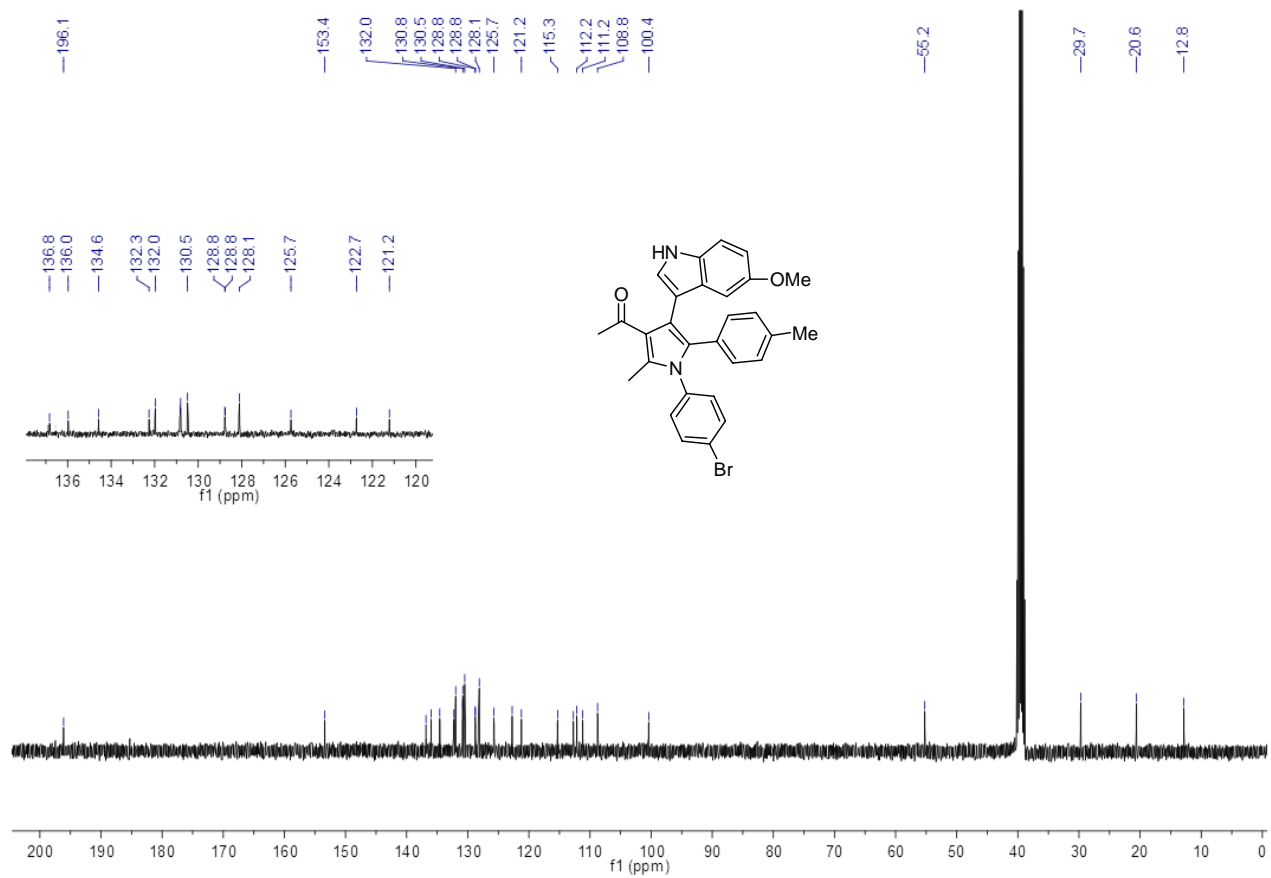

<sup>13</sup>C NMR Spectrum of Compound 4l

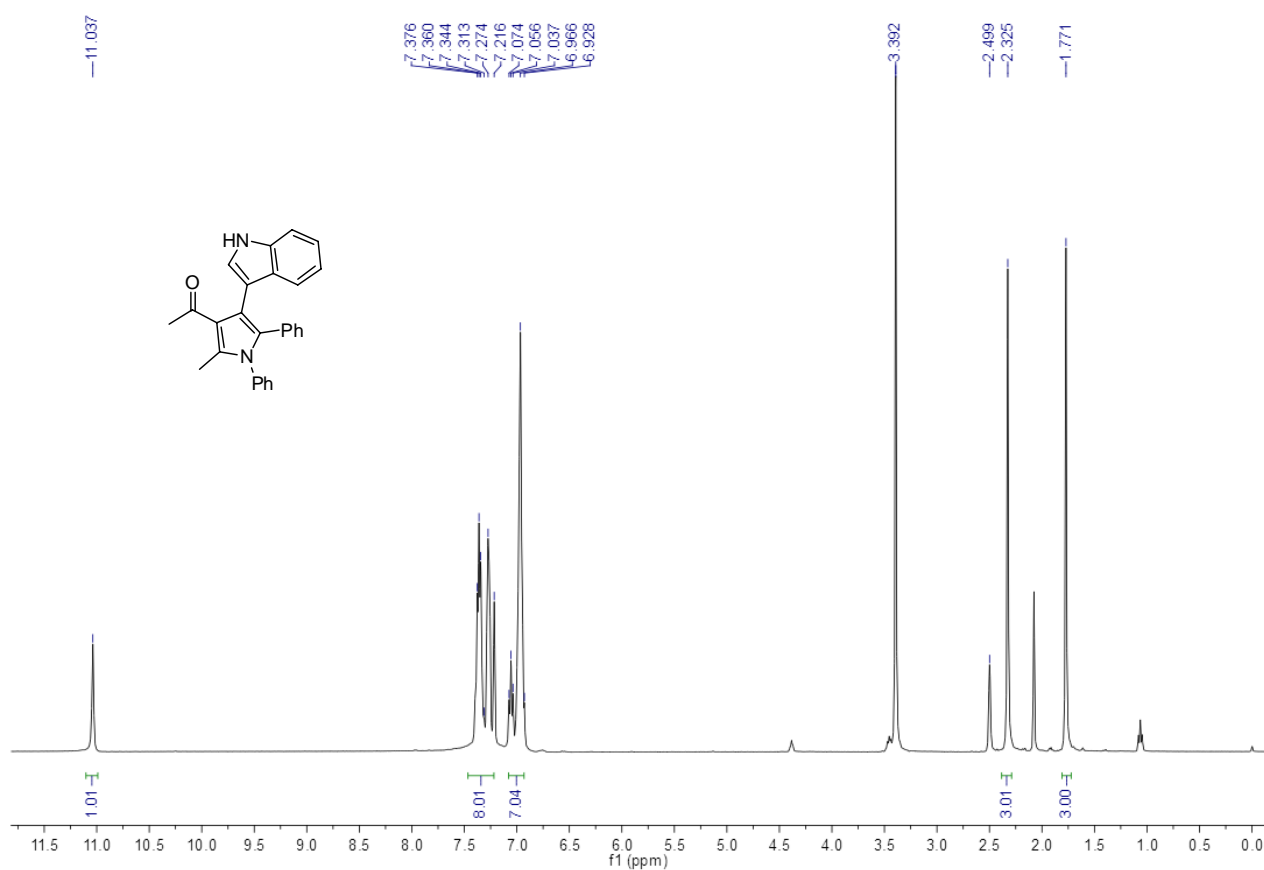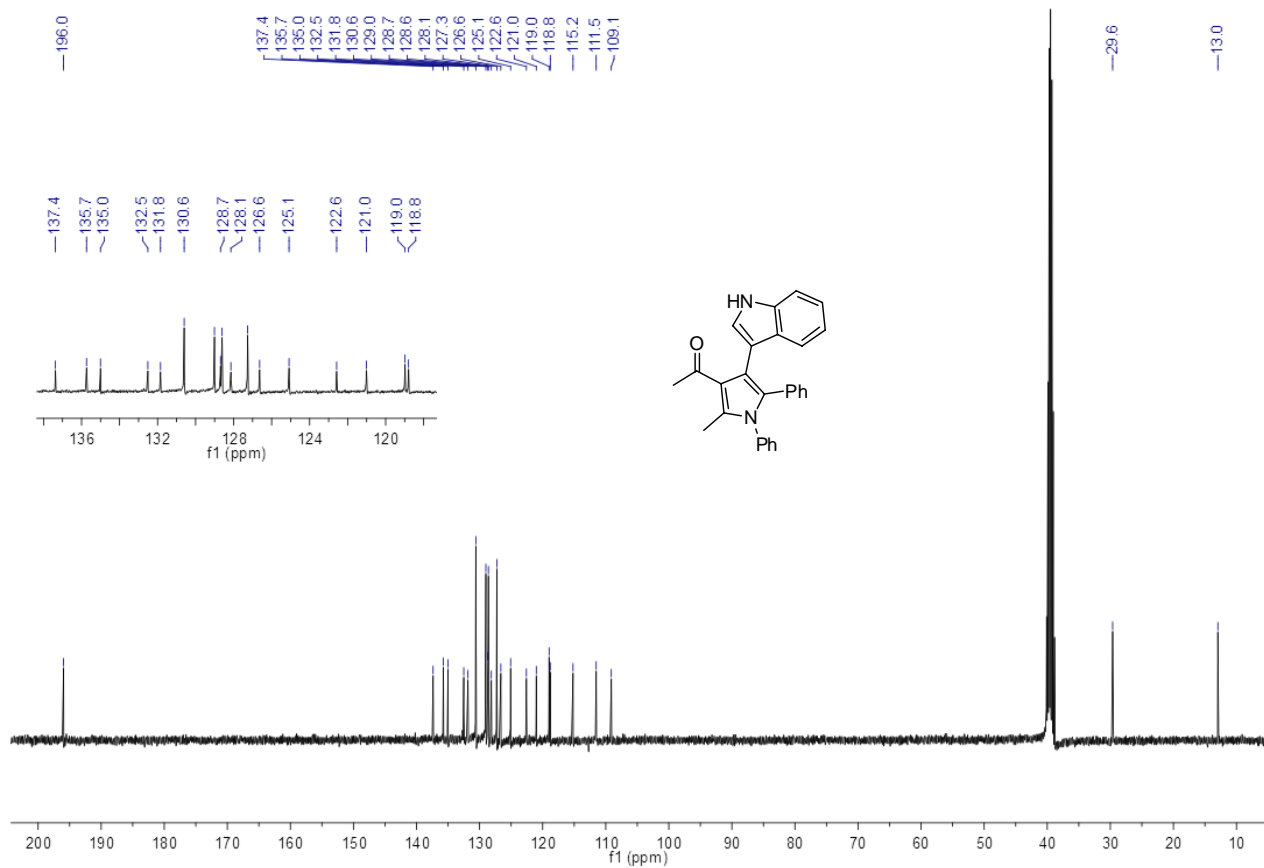

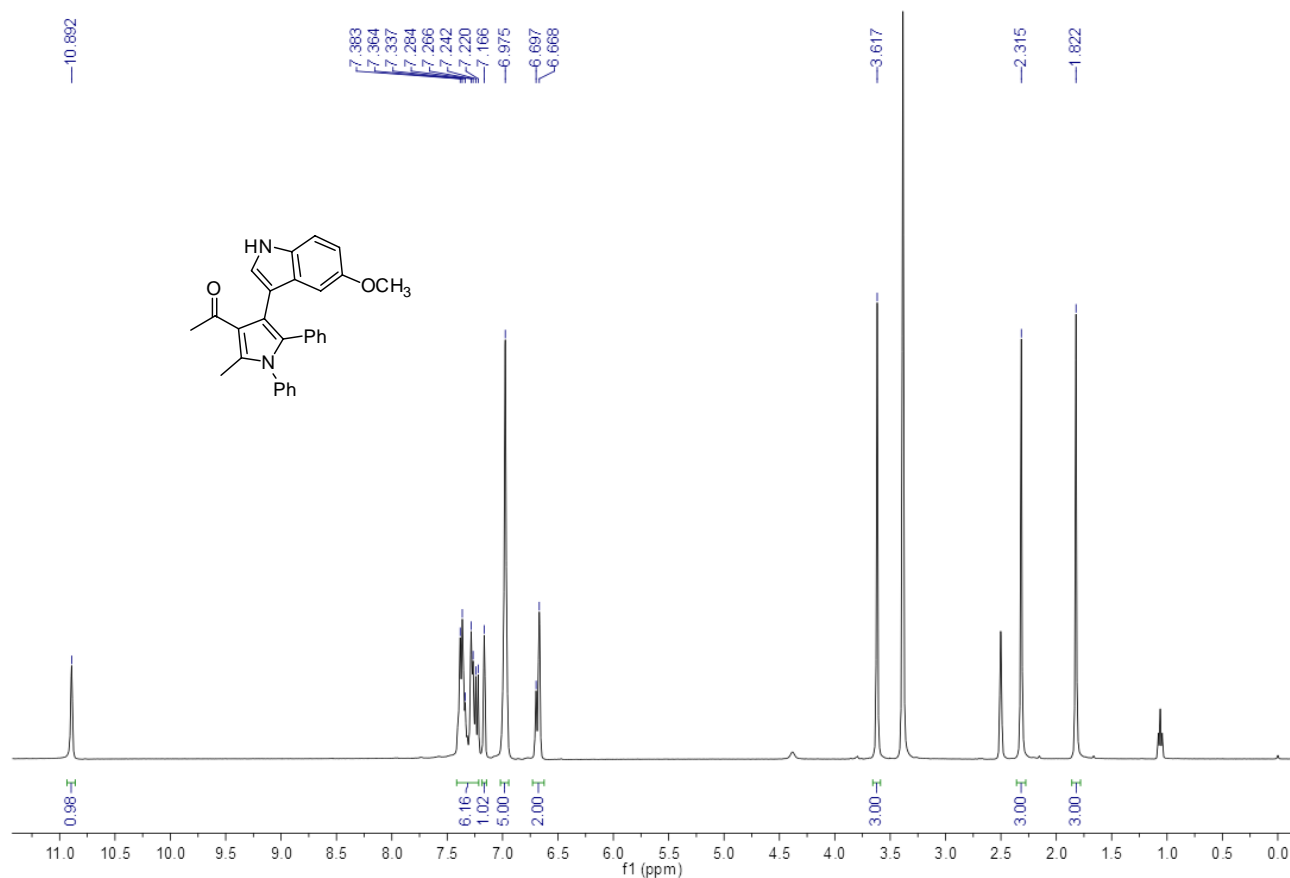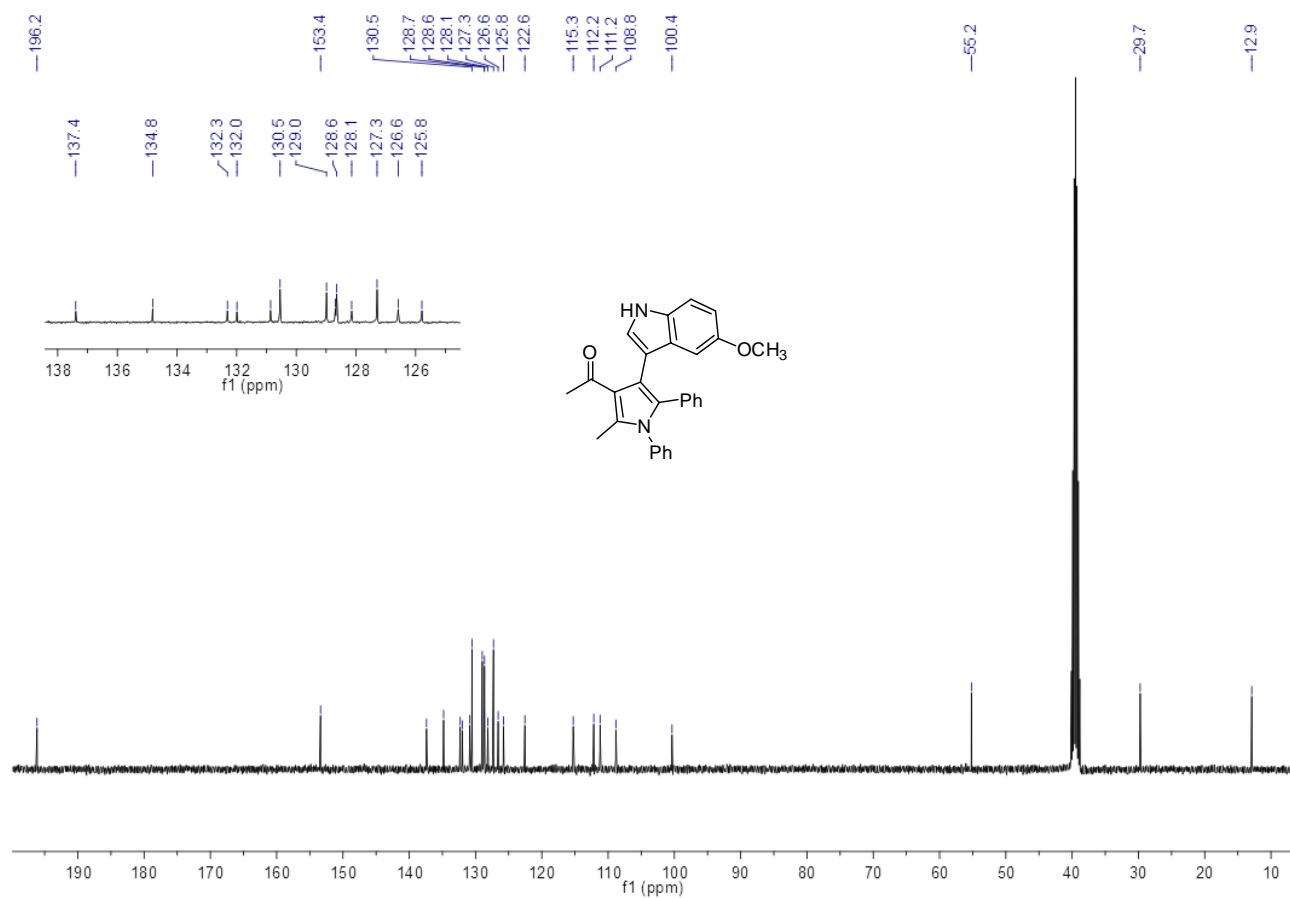

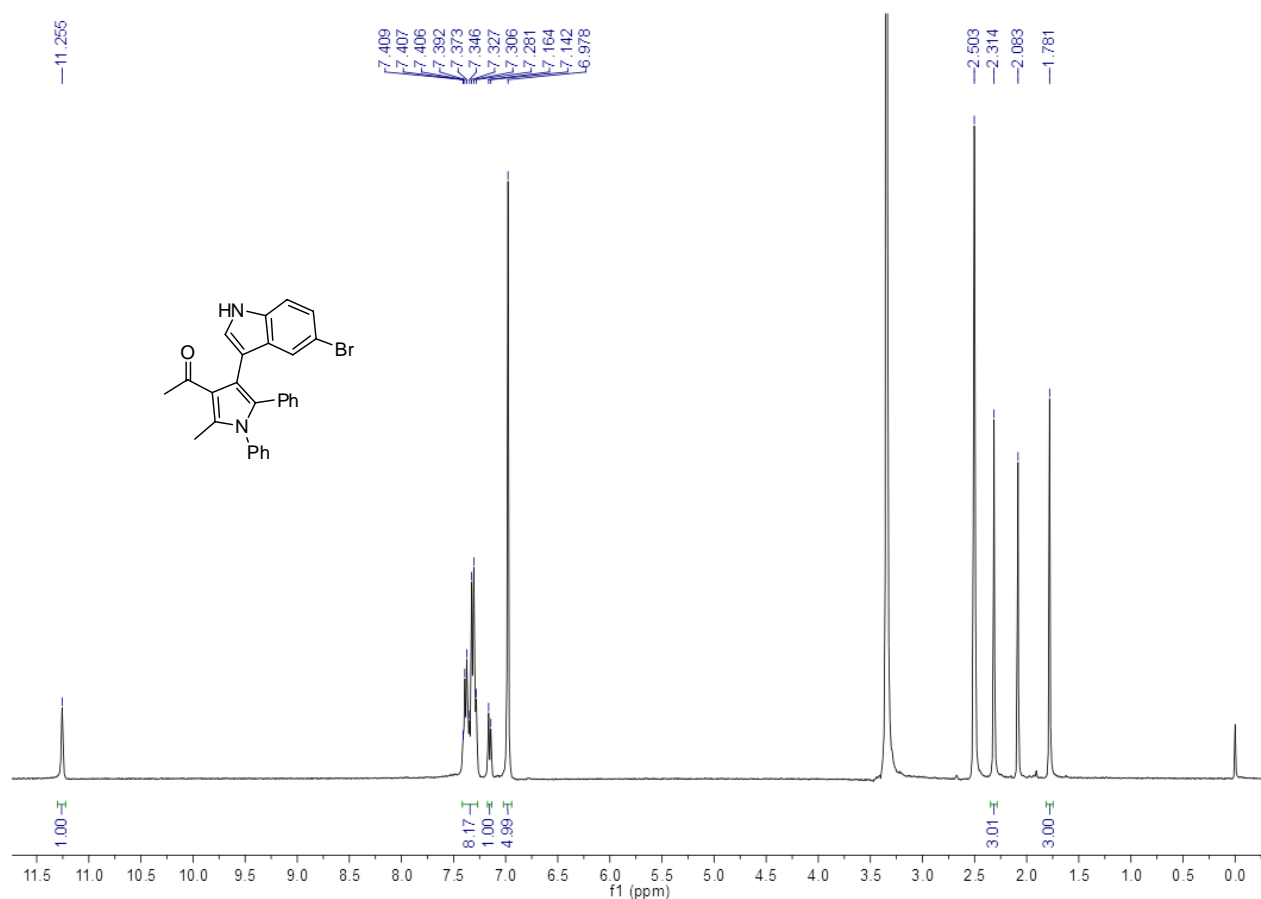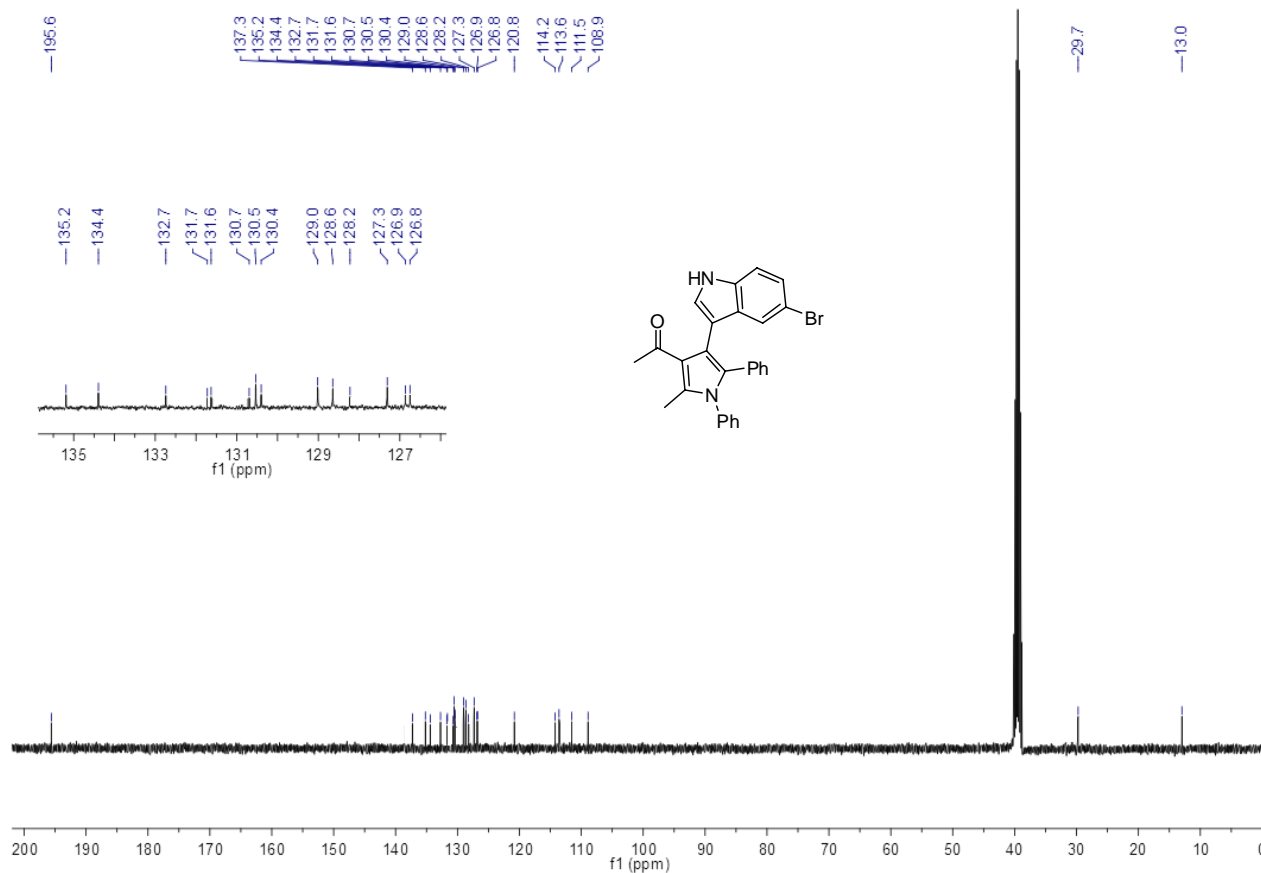



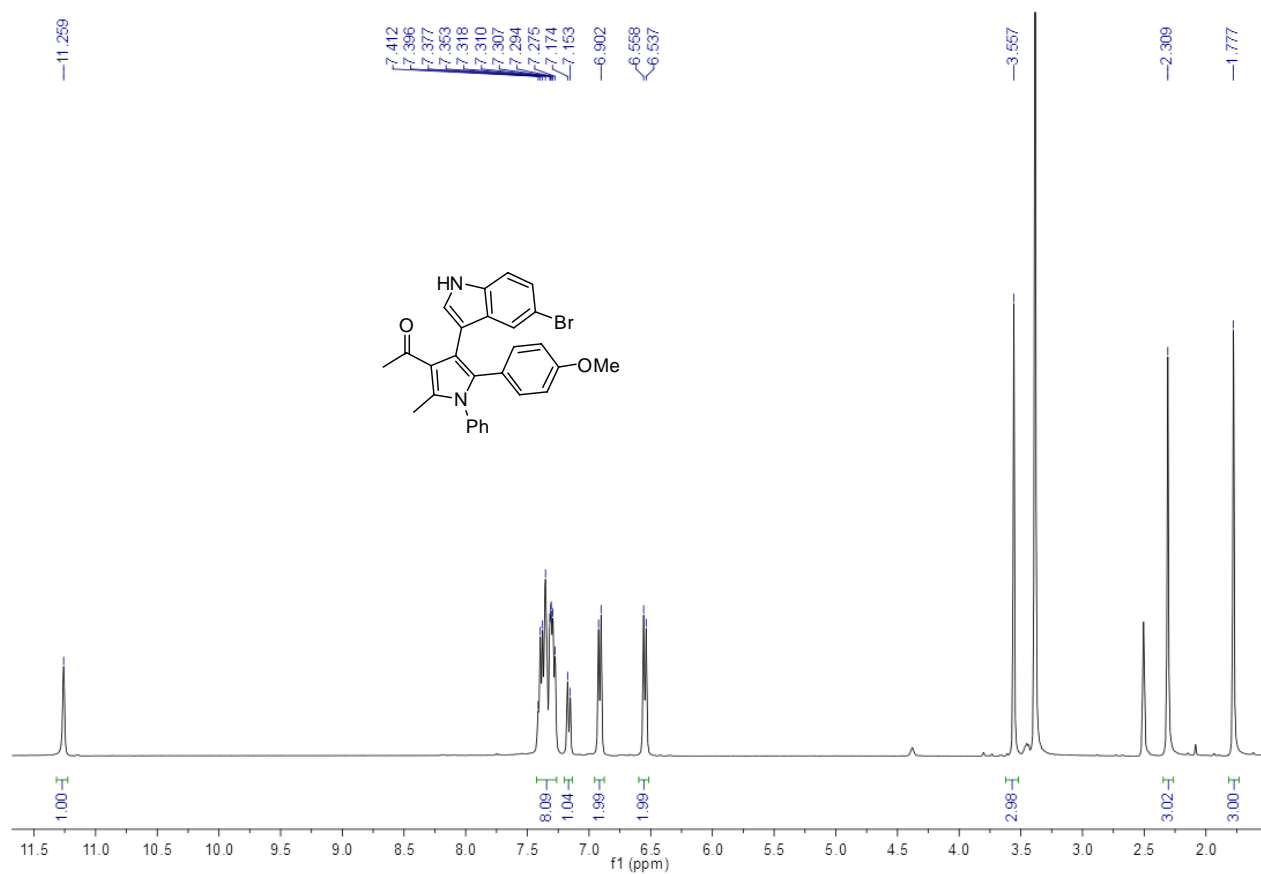

**<sup>1</sup>H NMR Spectrum of Compound 4p**

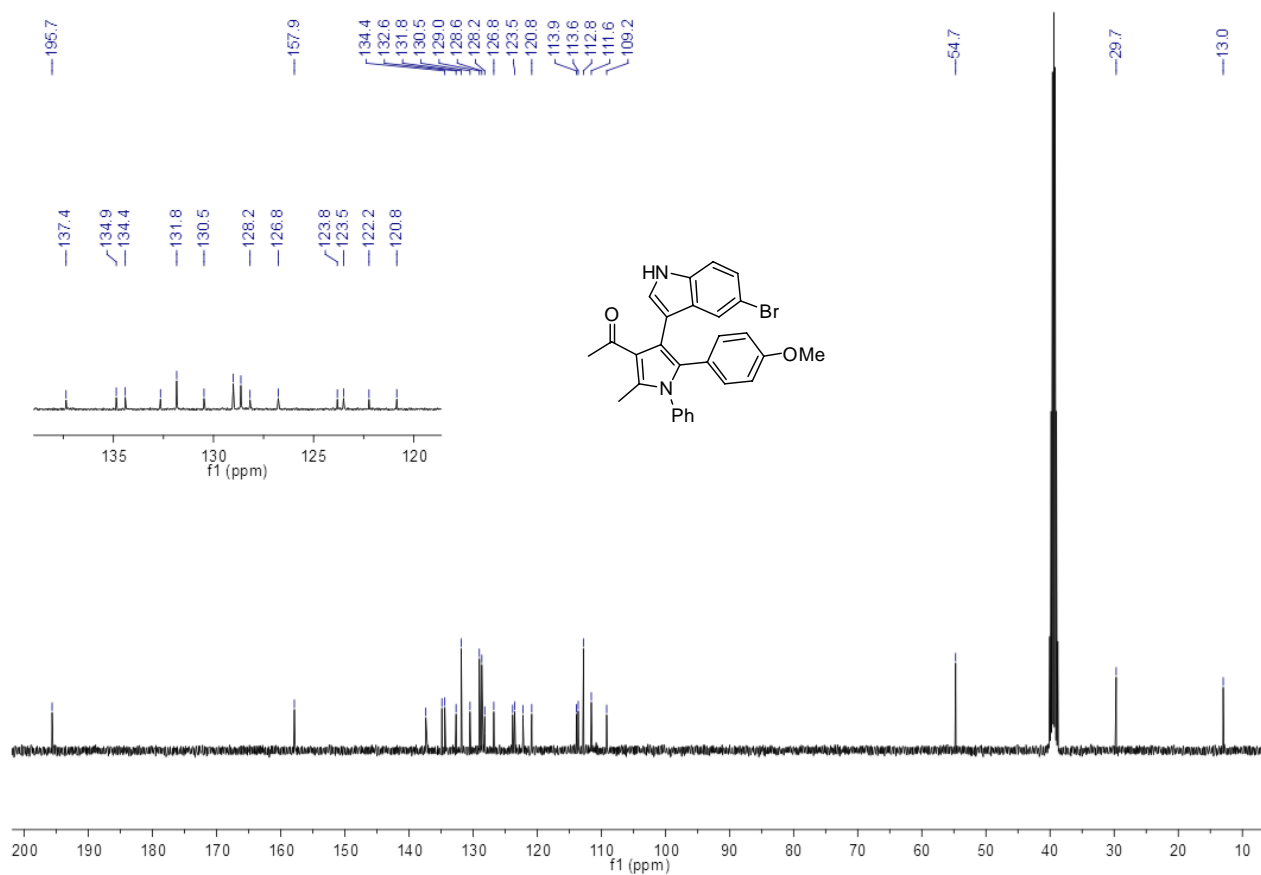

**<sup>13</sup>C NMR Spectrum of Compound 4p**

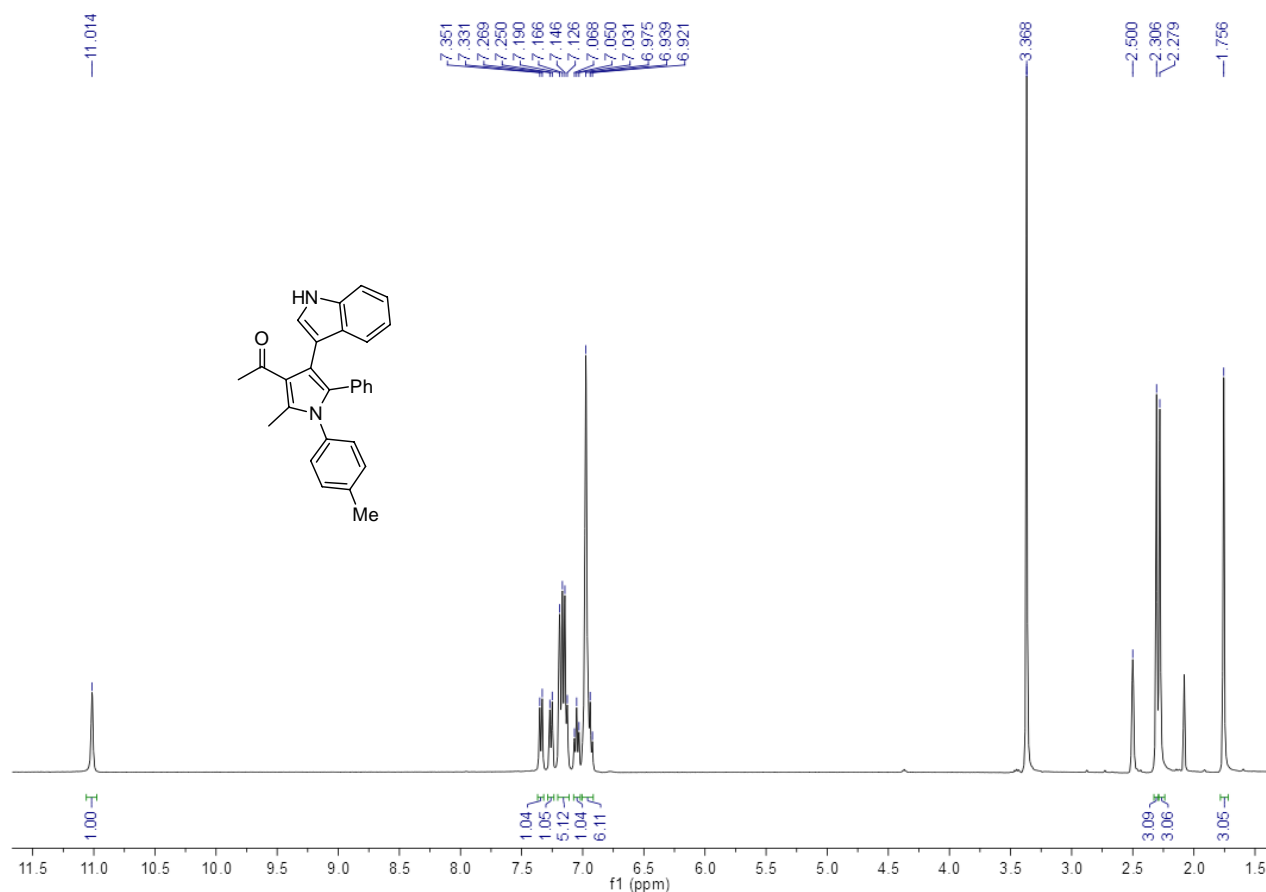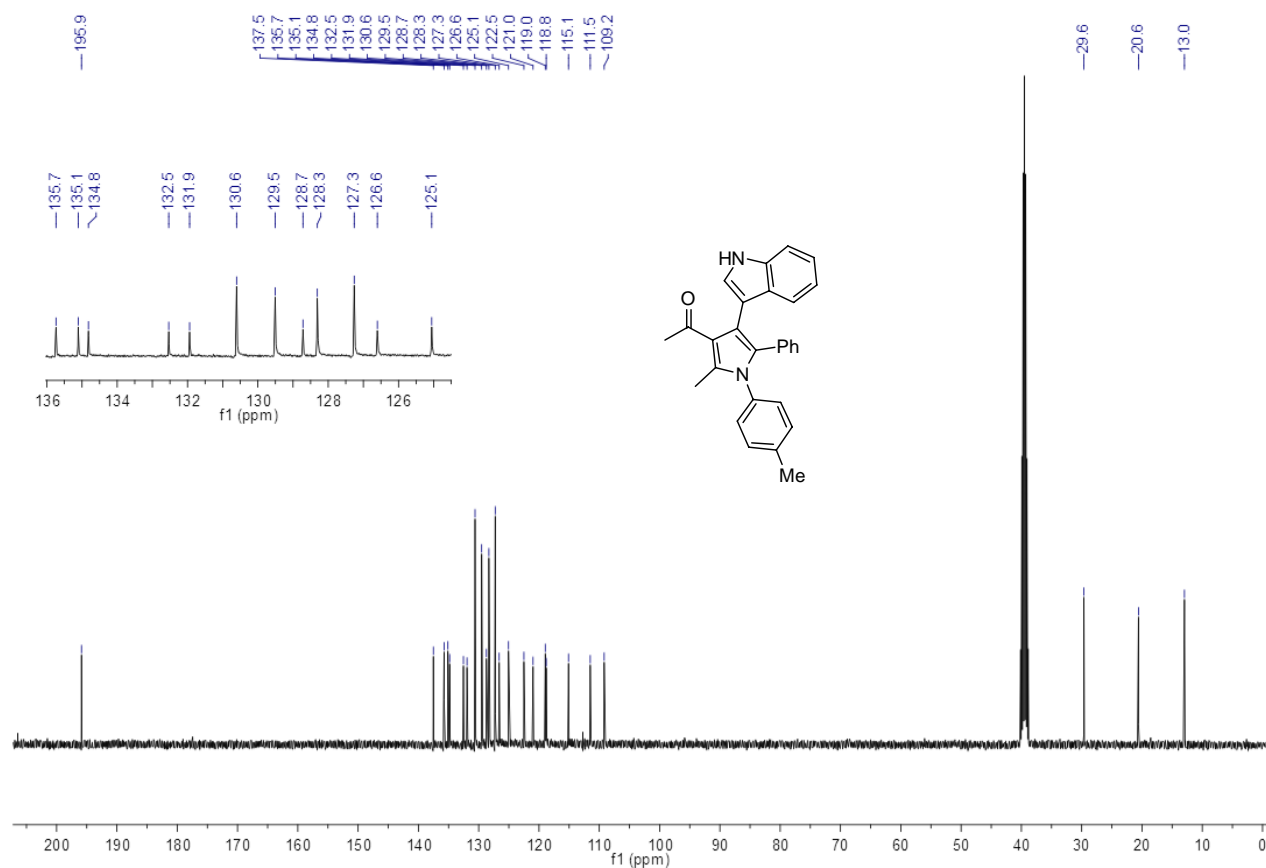

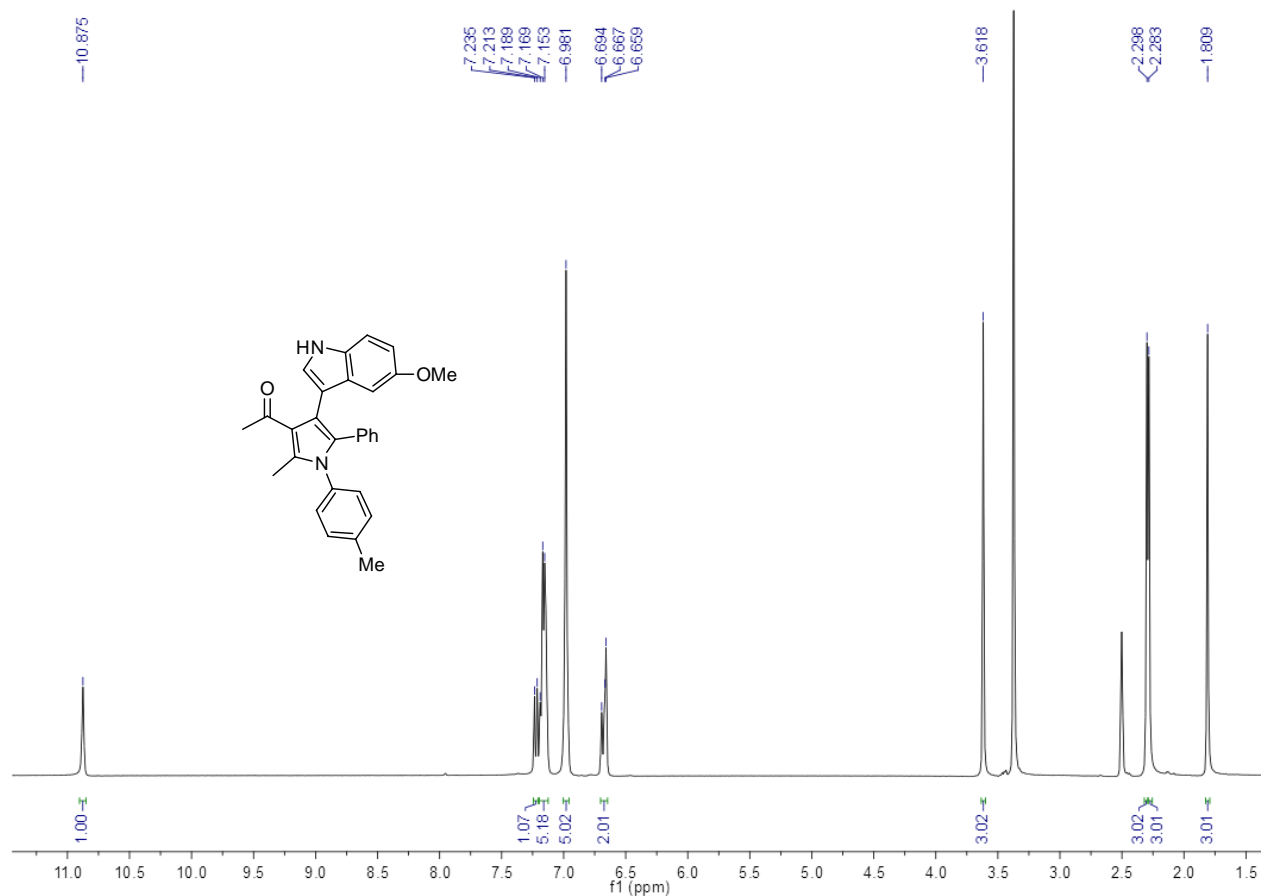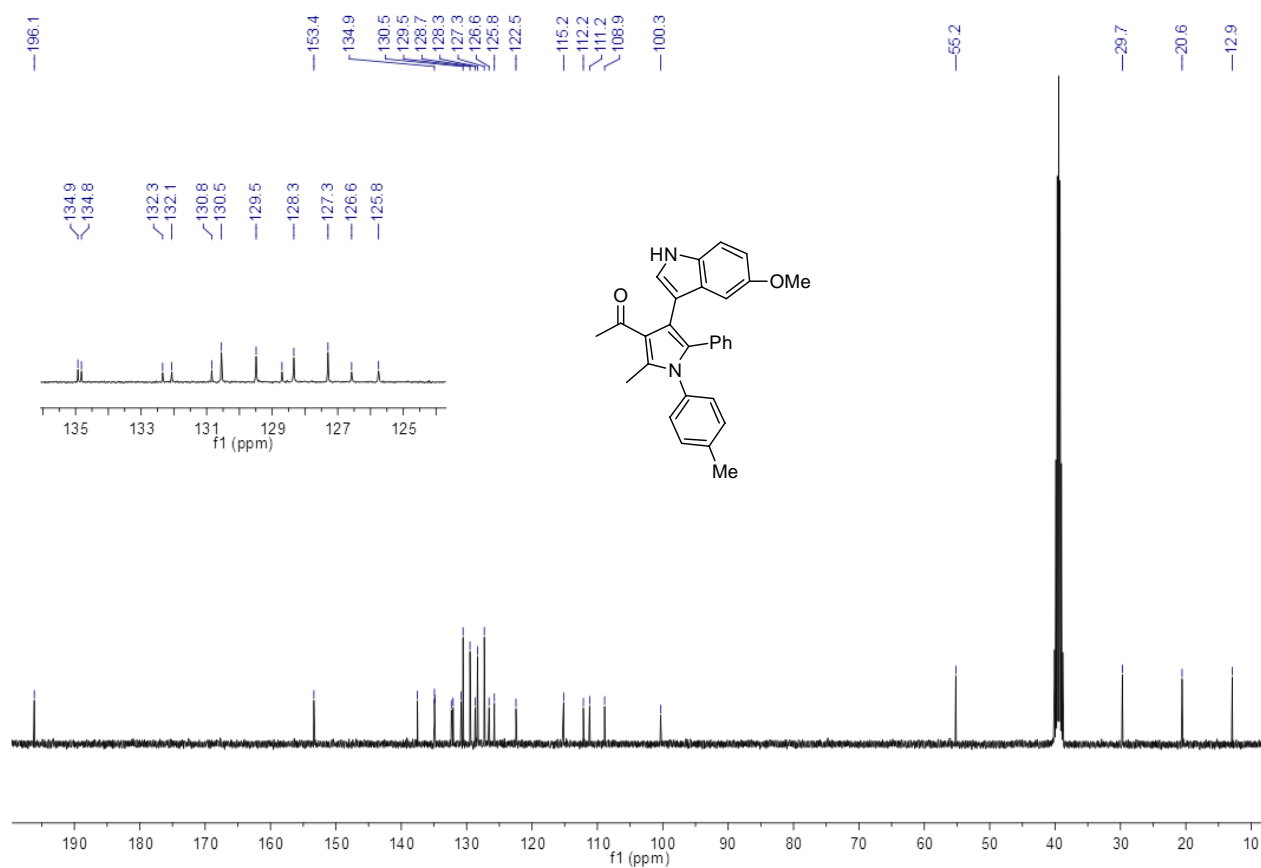

**<sup>13</sup>C NMR Spectrum of Compound 4r**

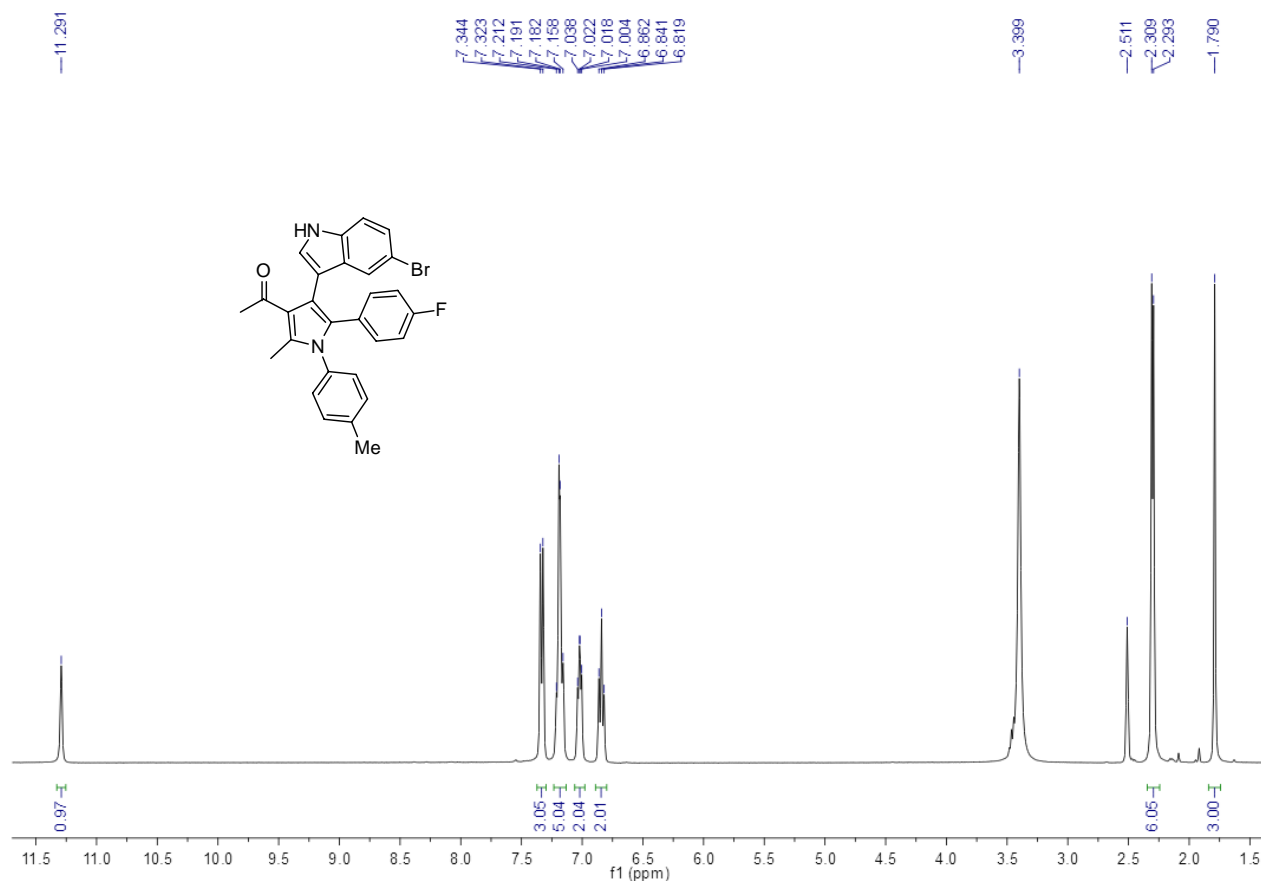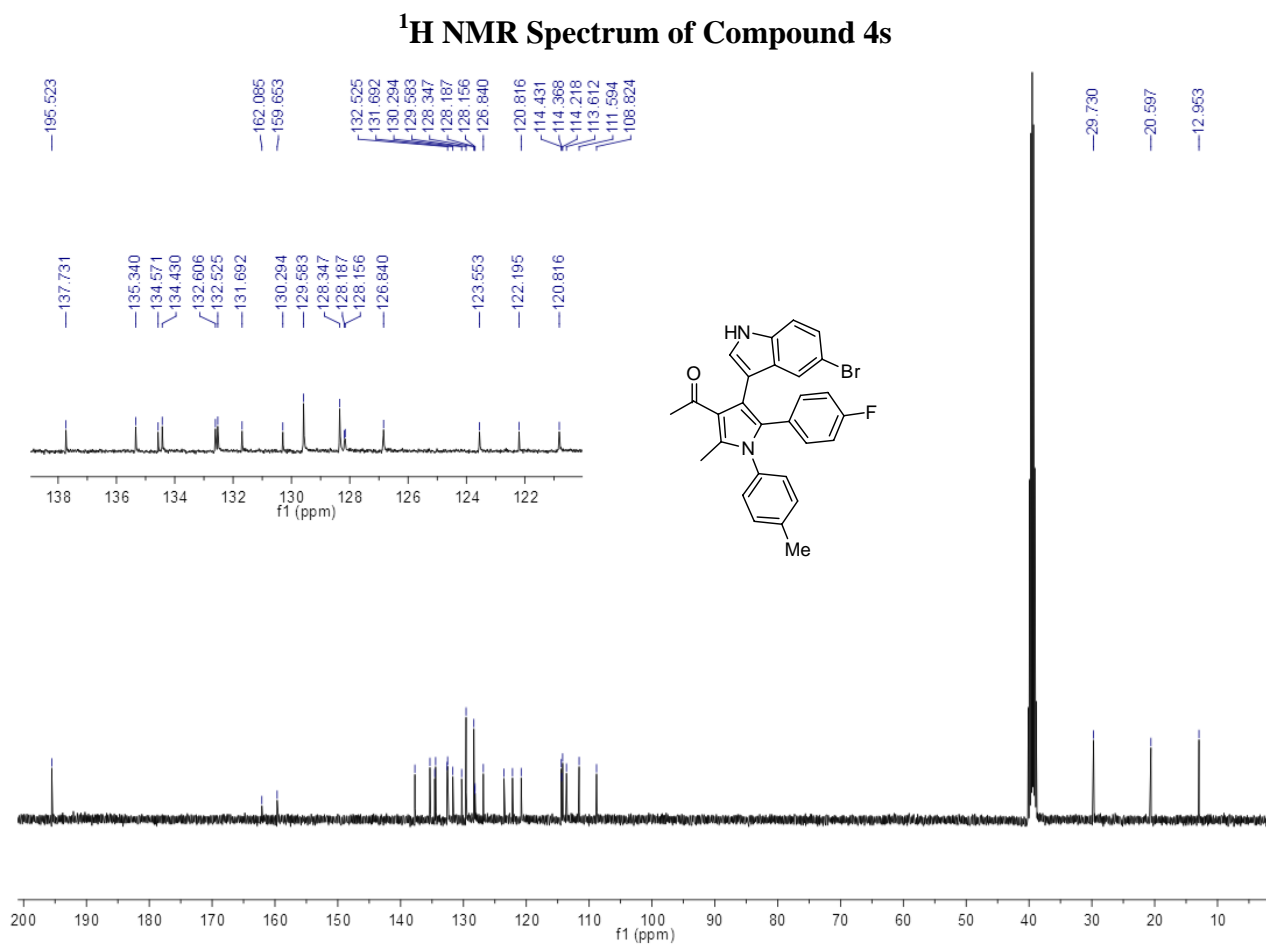

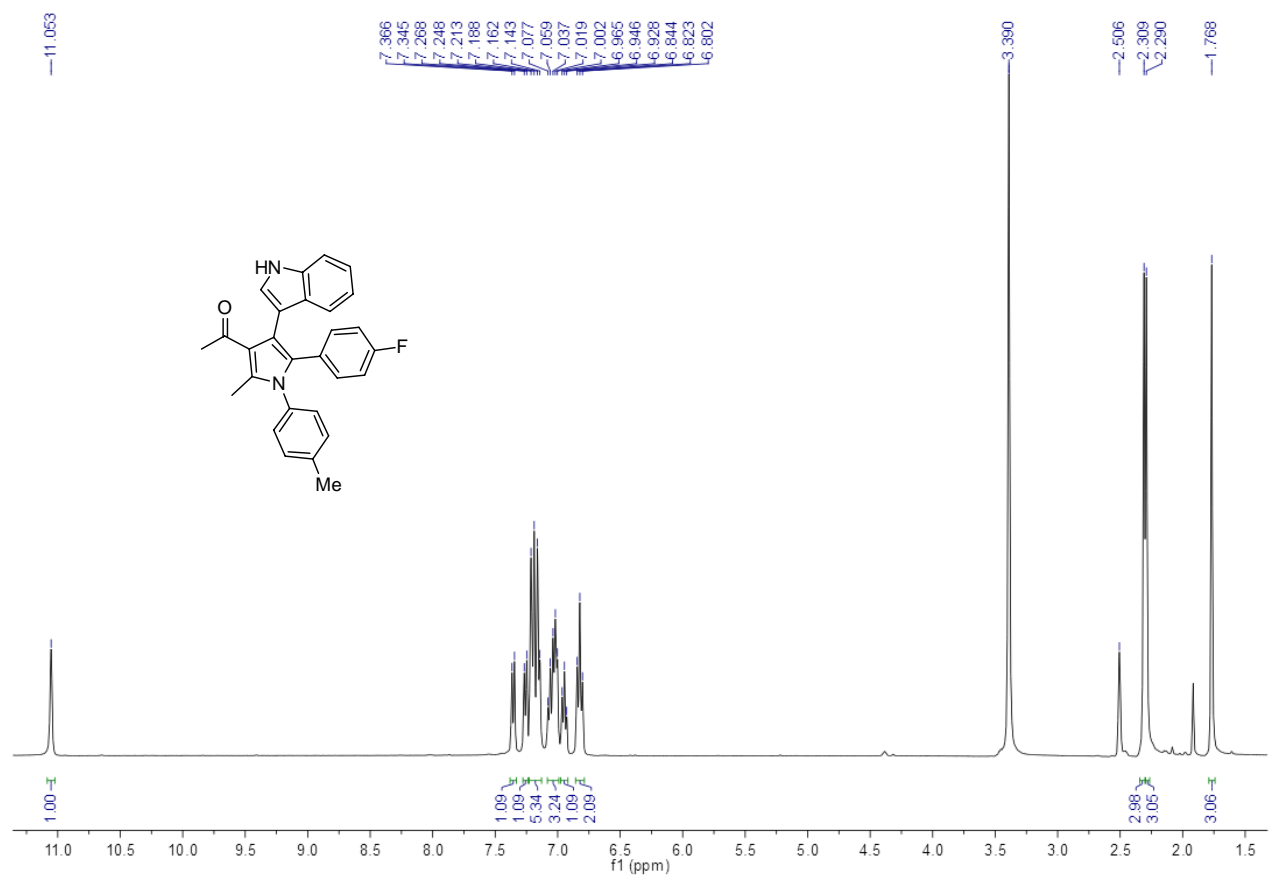

<sup>1</sup>H NMR Spectrum of Compound 4t

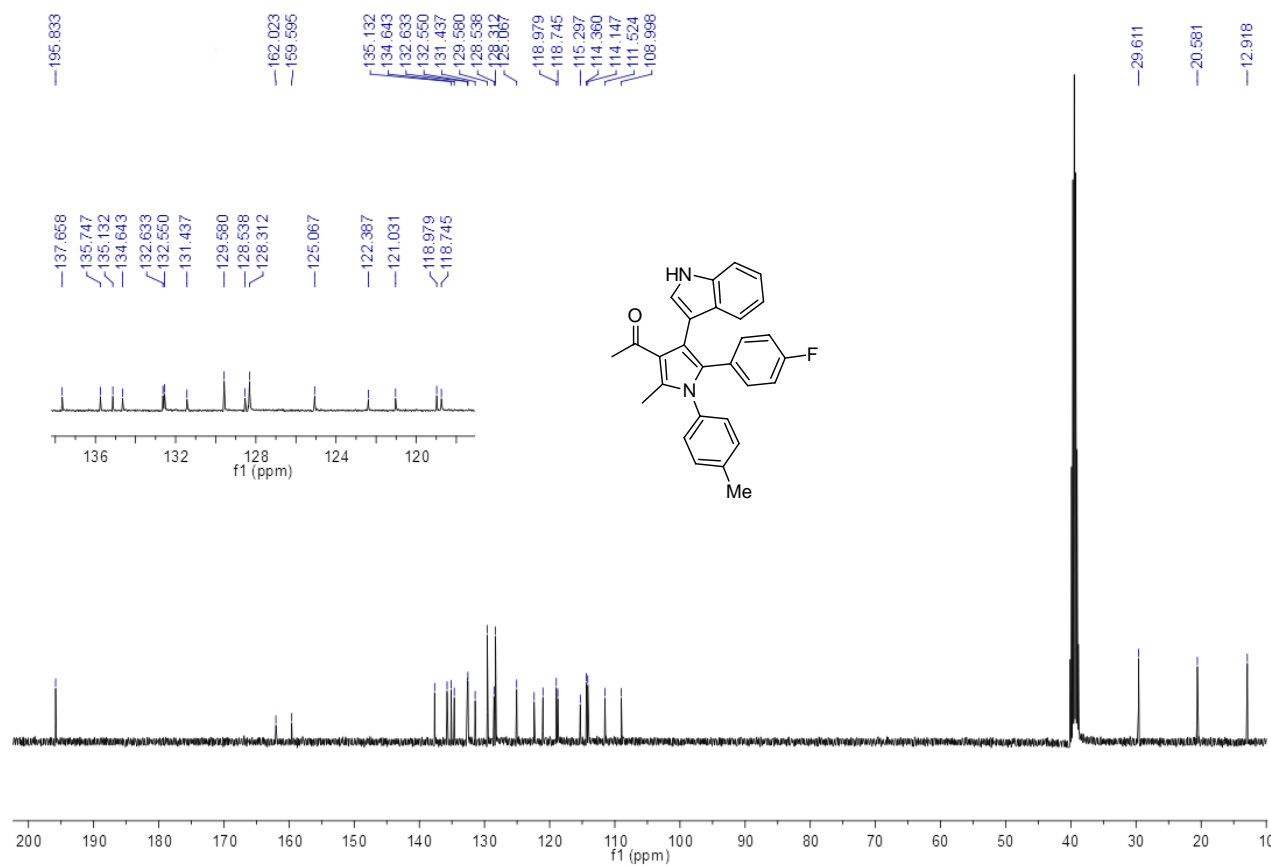

<sup>13</sup>C NMR Spectrum of Compound 4t

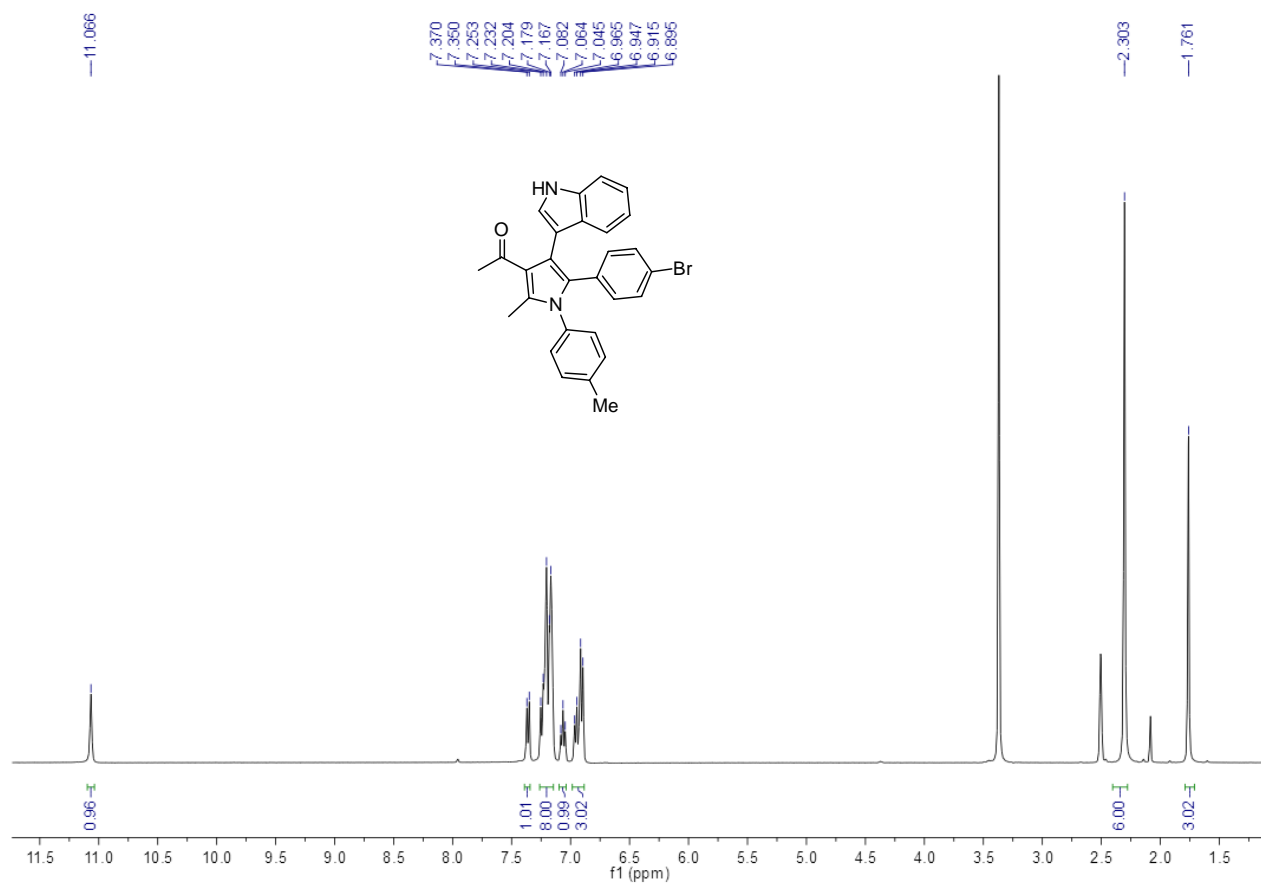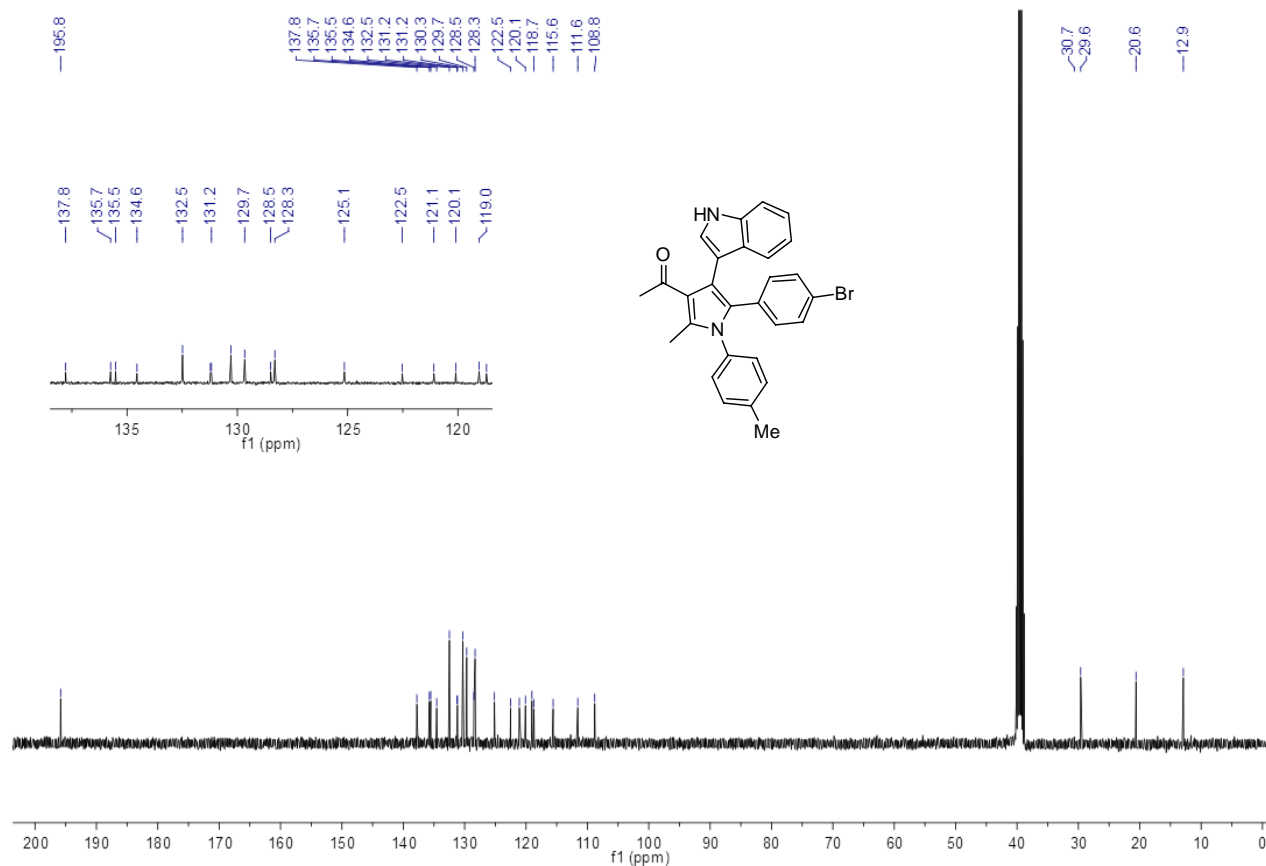

**<sup>13</sup>C NMR Spectrum of Compound 4u**

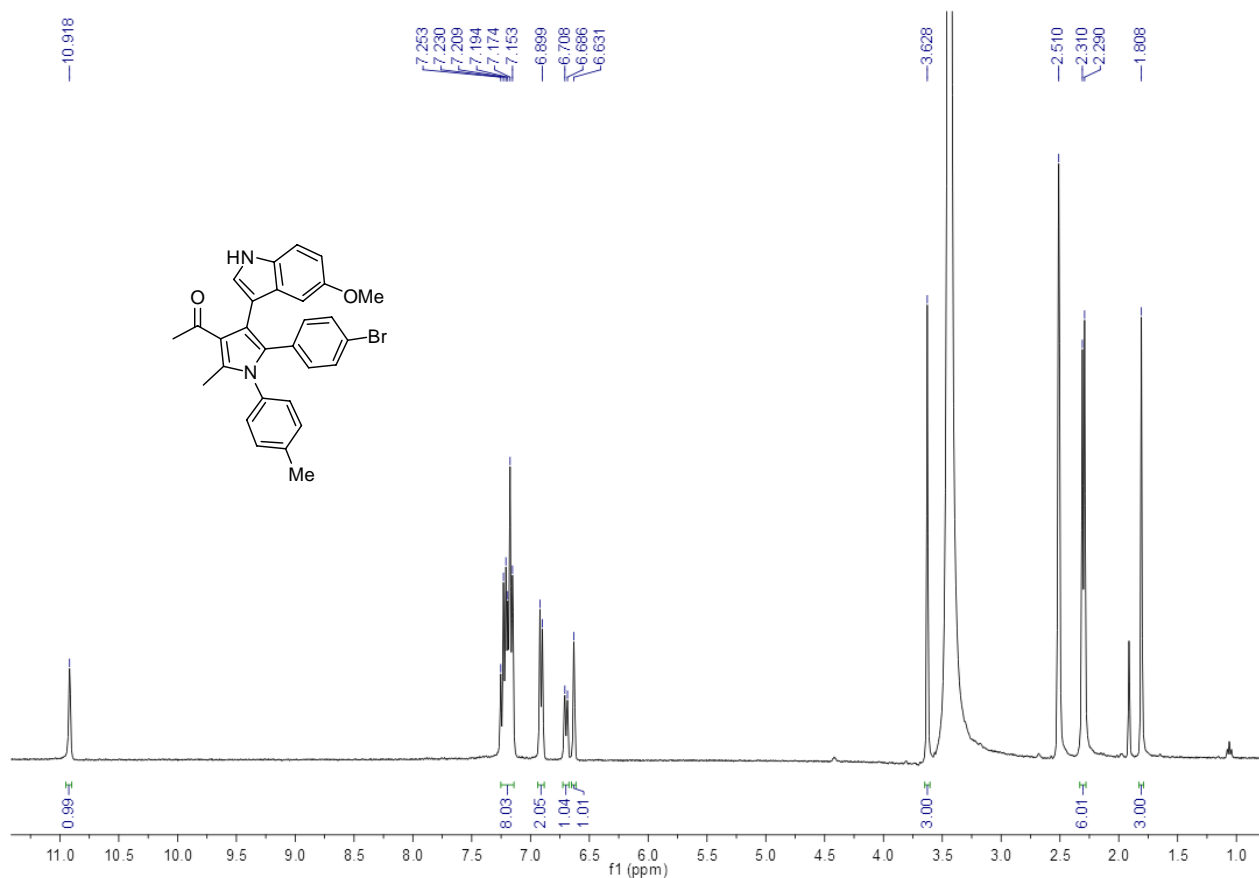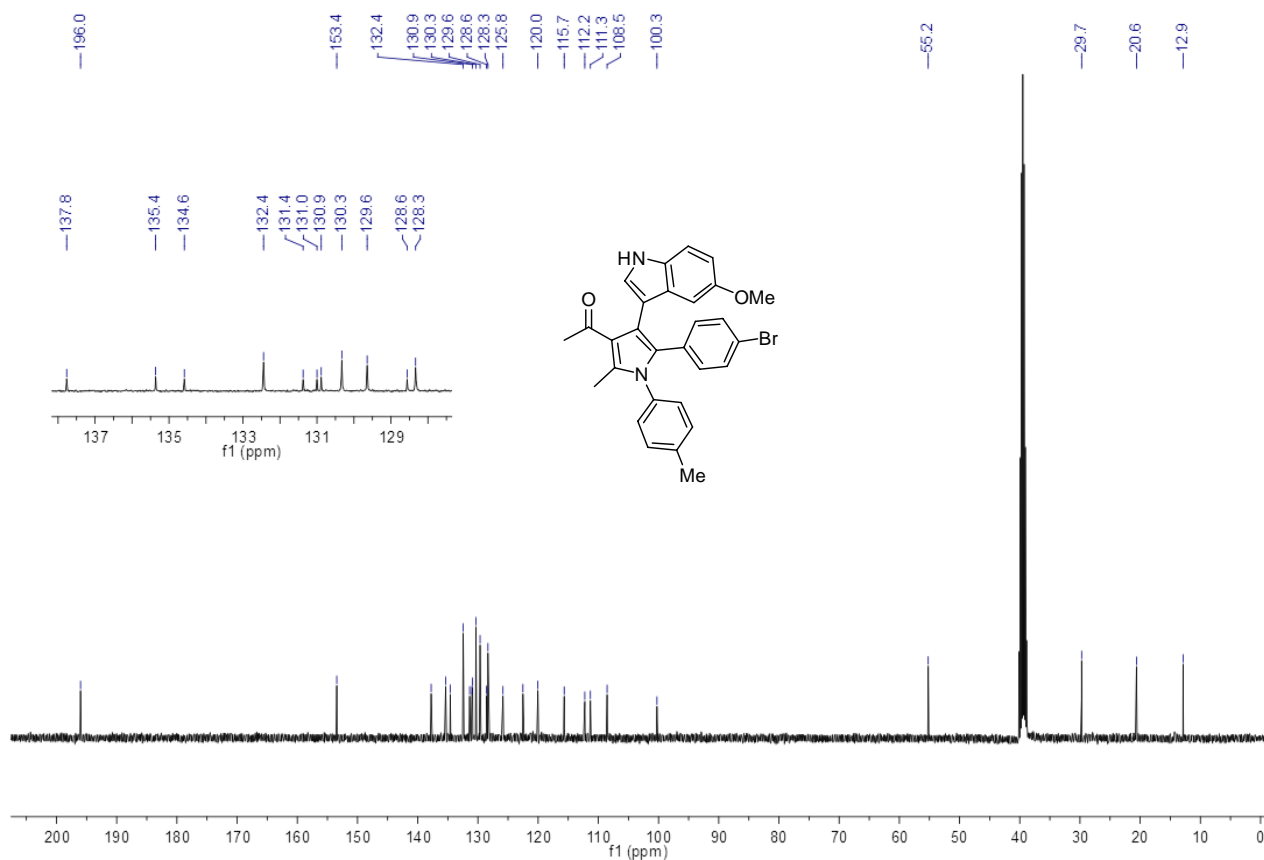

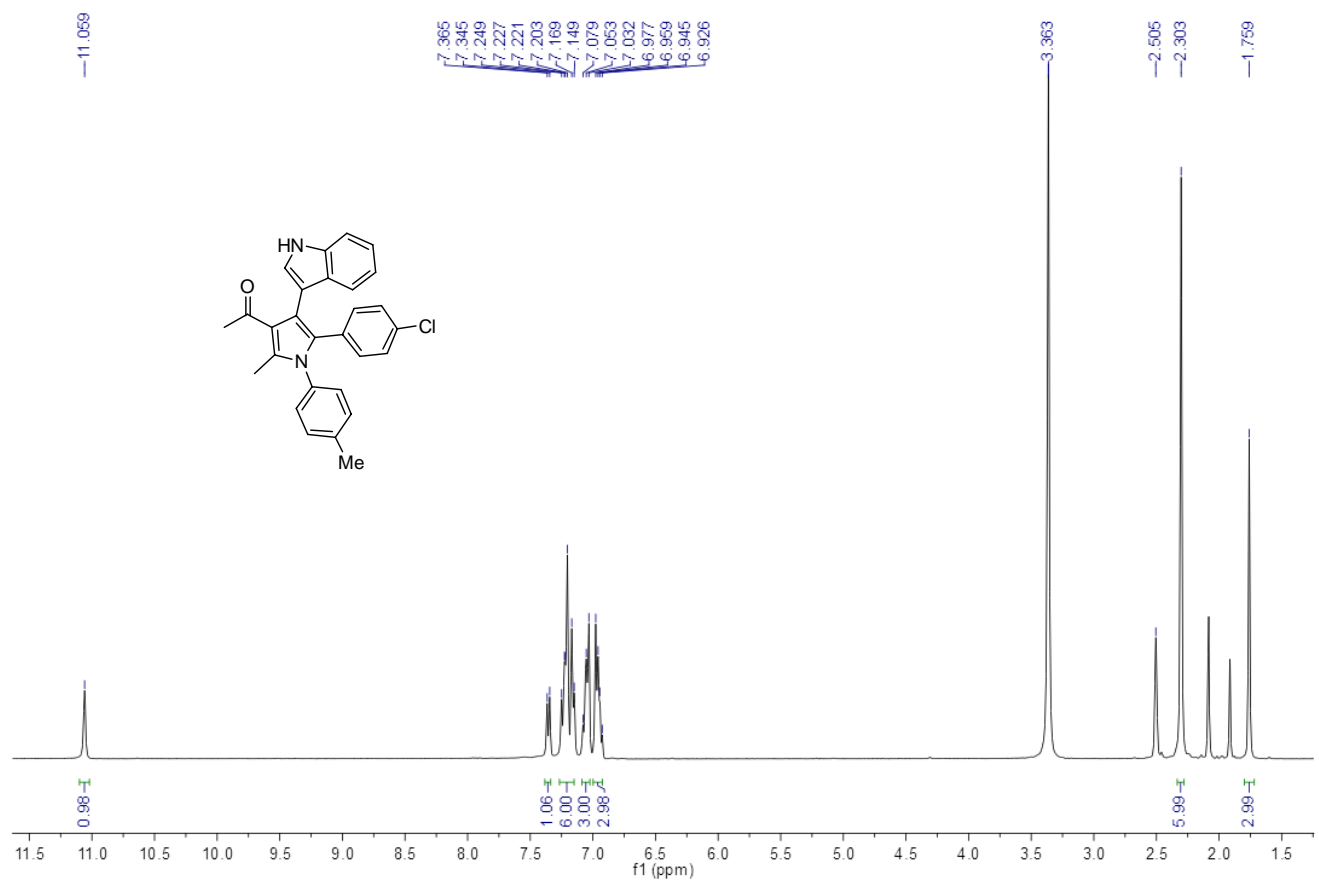

<sup>1</sup>H NMR Spectrum of Compound 4w

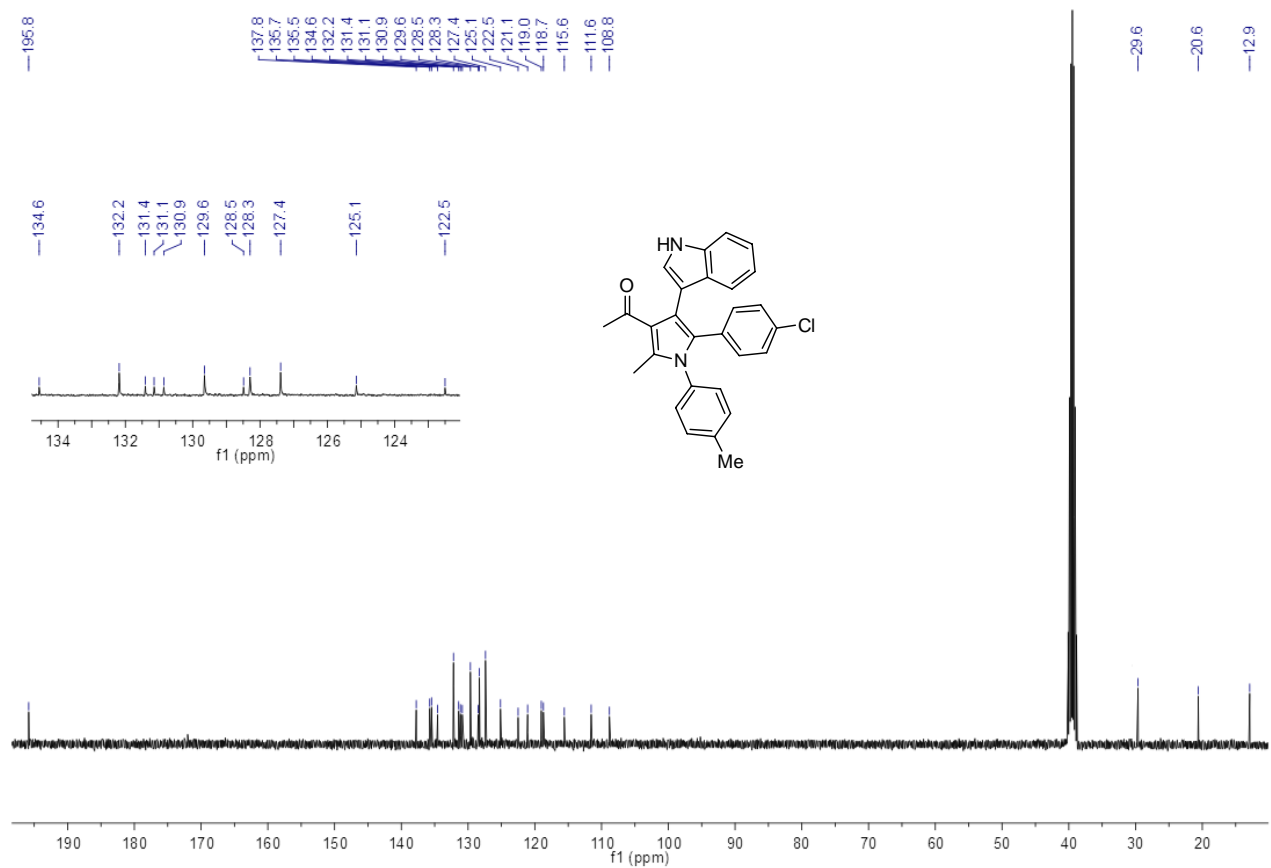

<sup>13</sup>C NMR Spectrum of Compound 4w



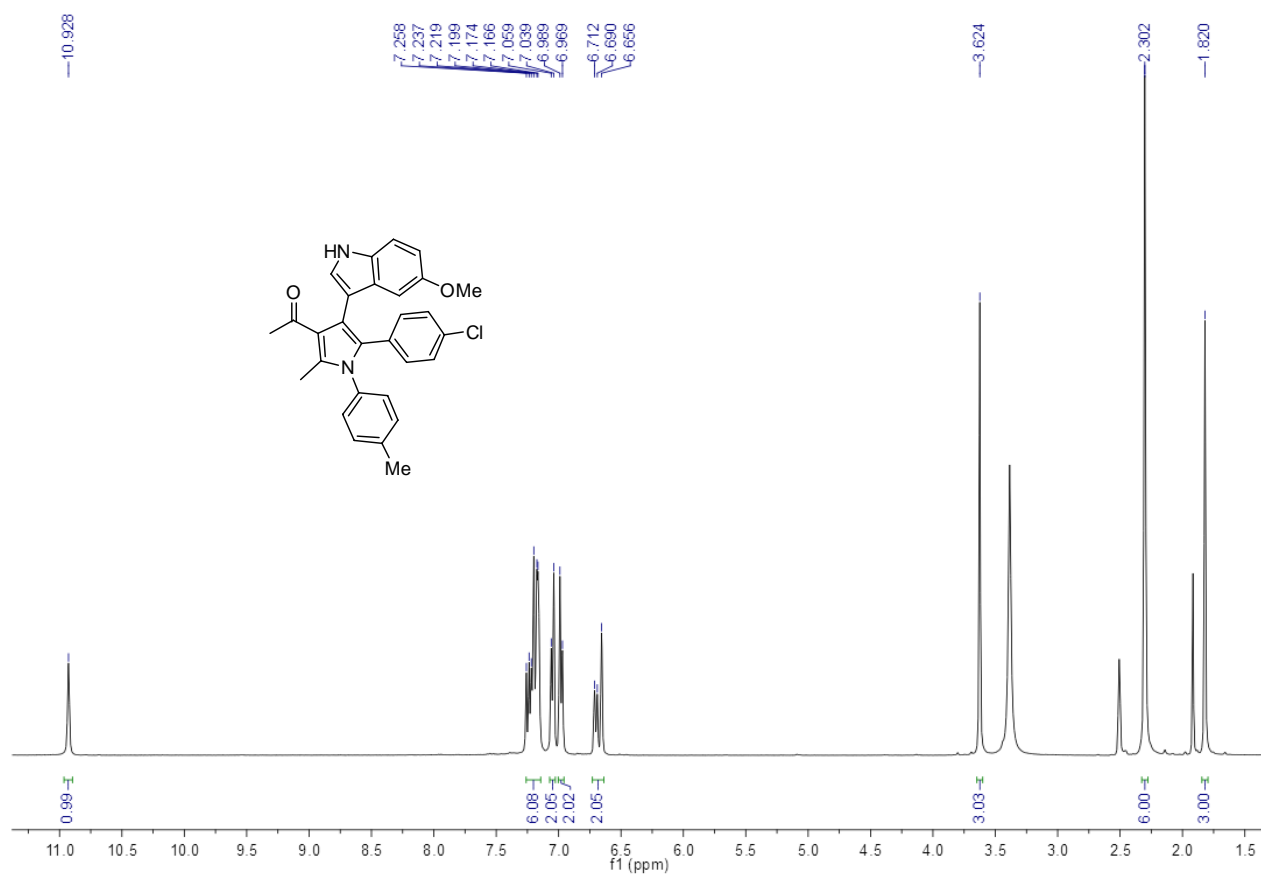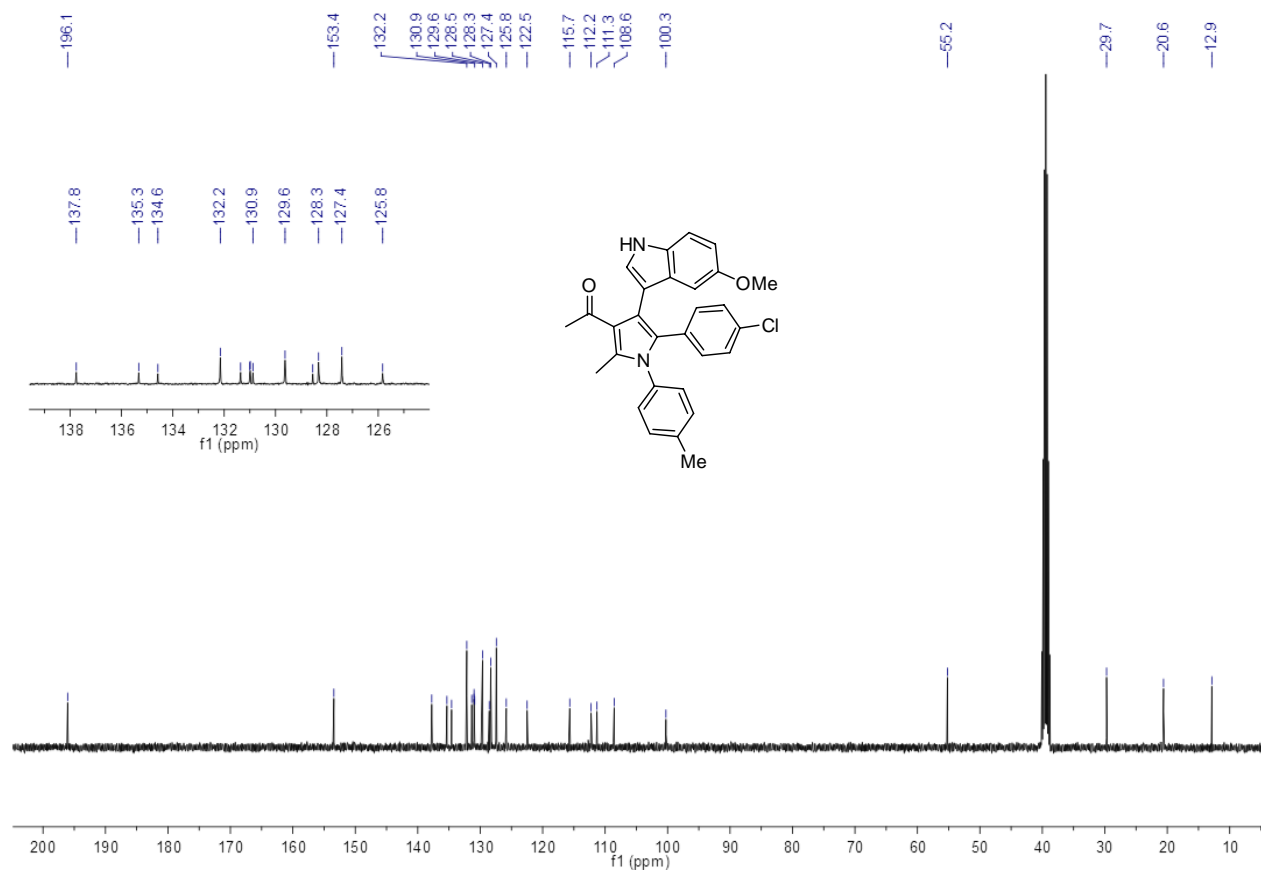

**<sup>13</sup>C NMR Spectrum of Compound 4x**

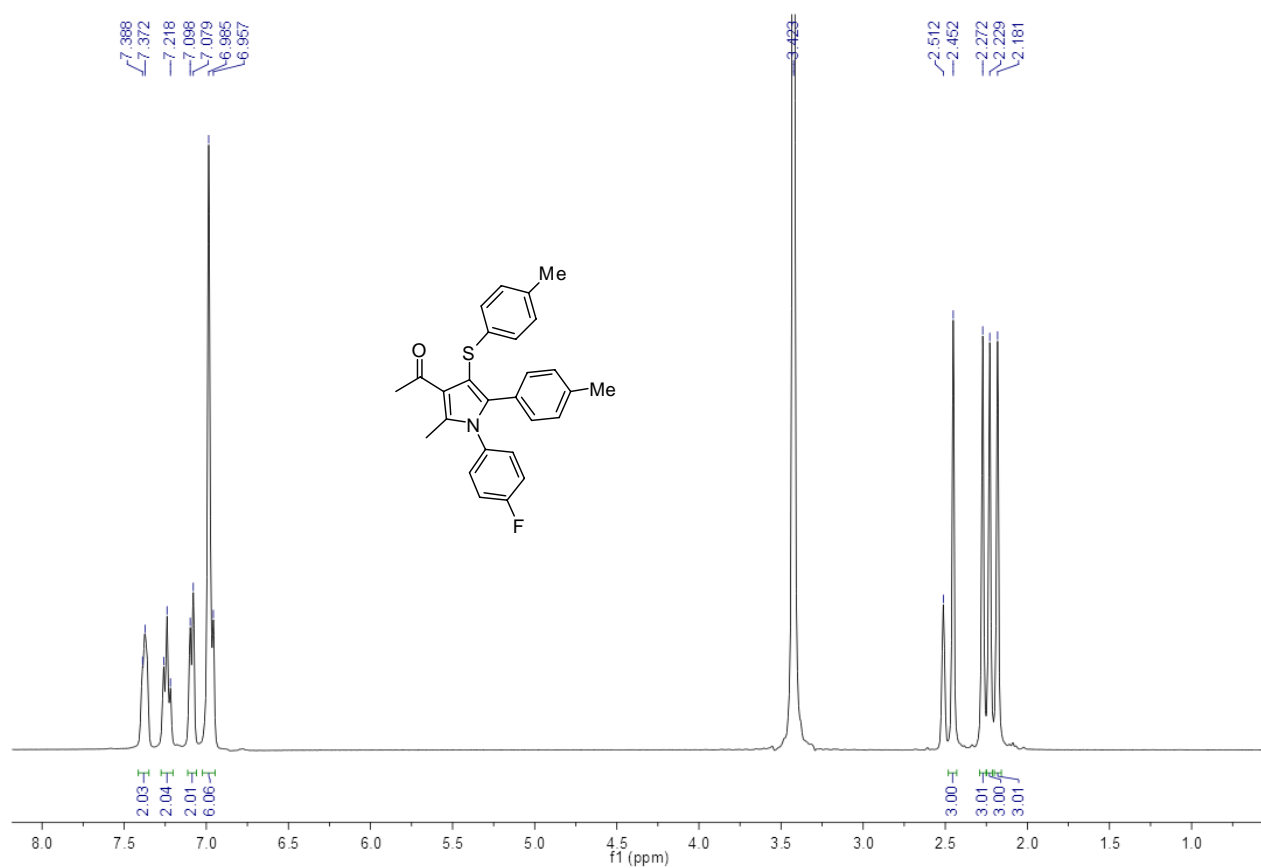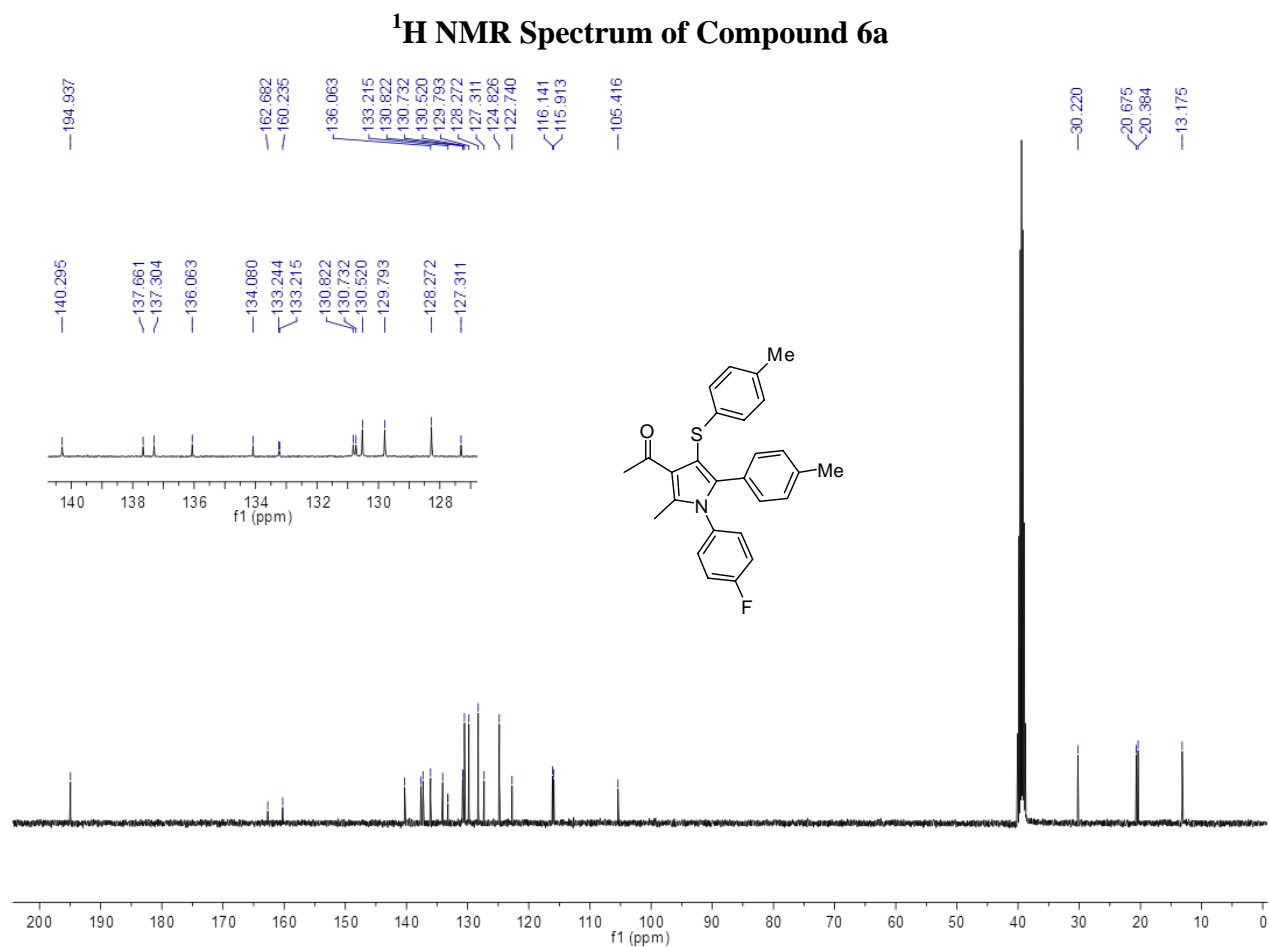

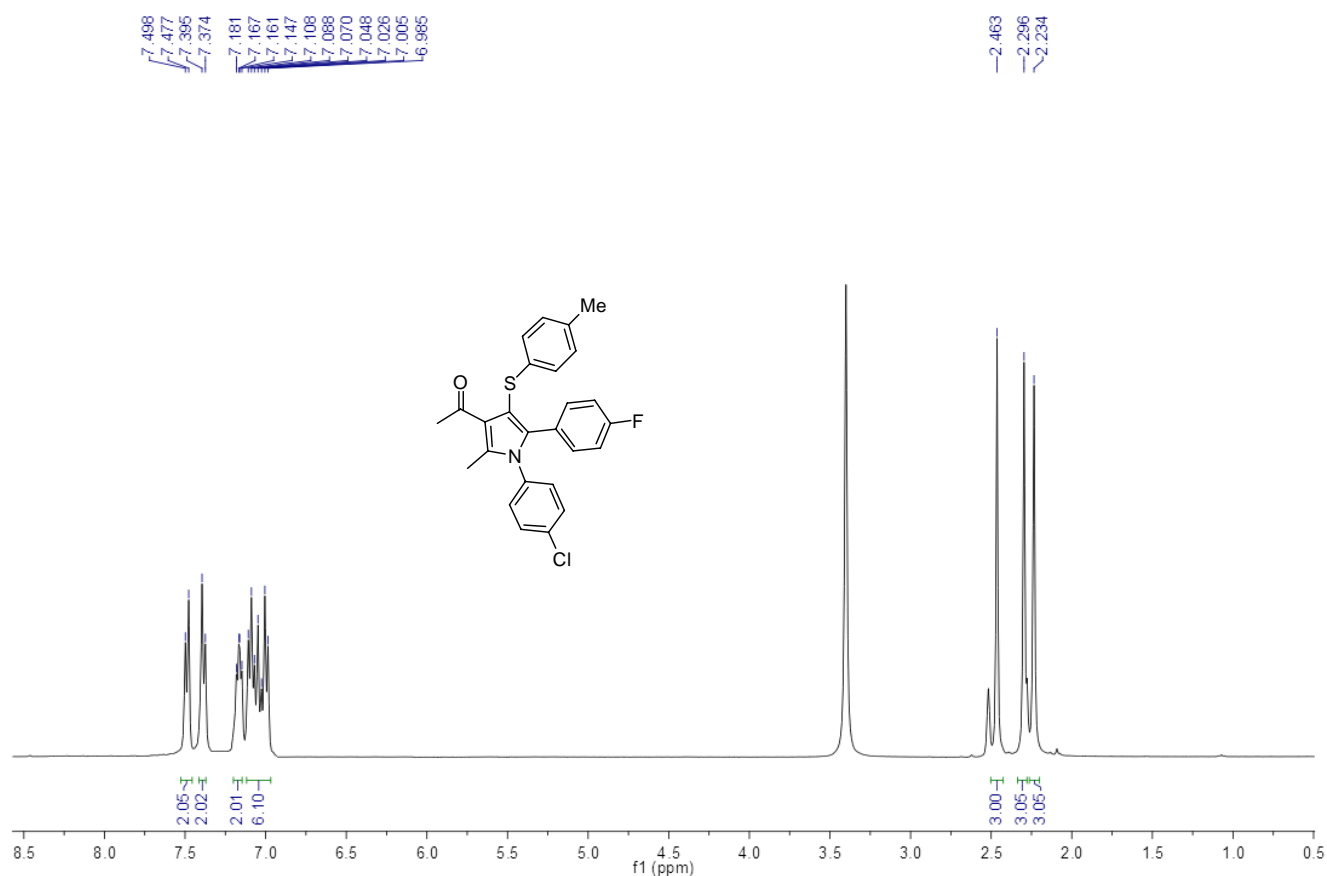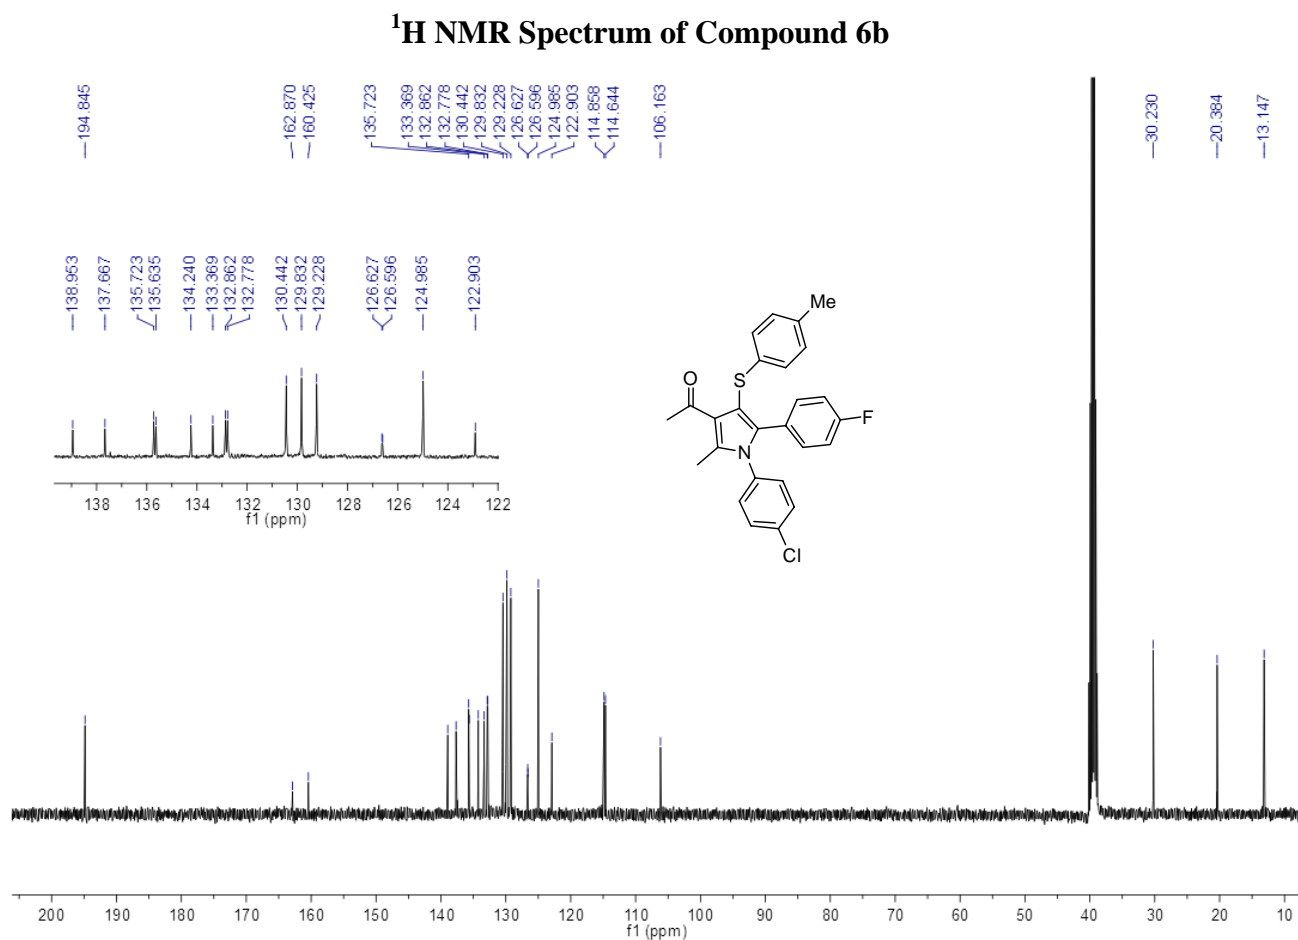

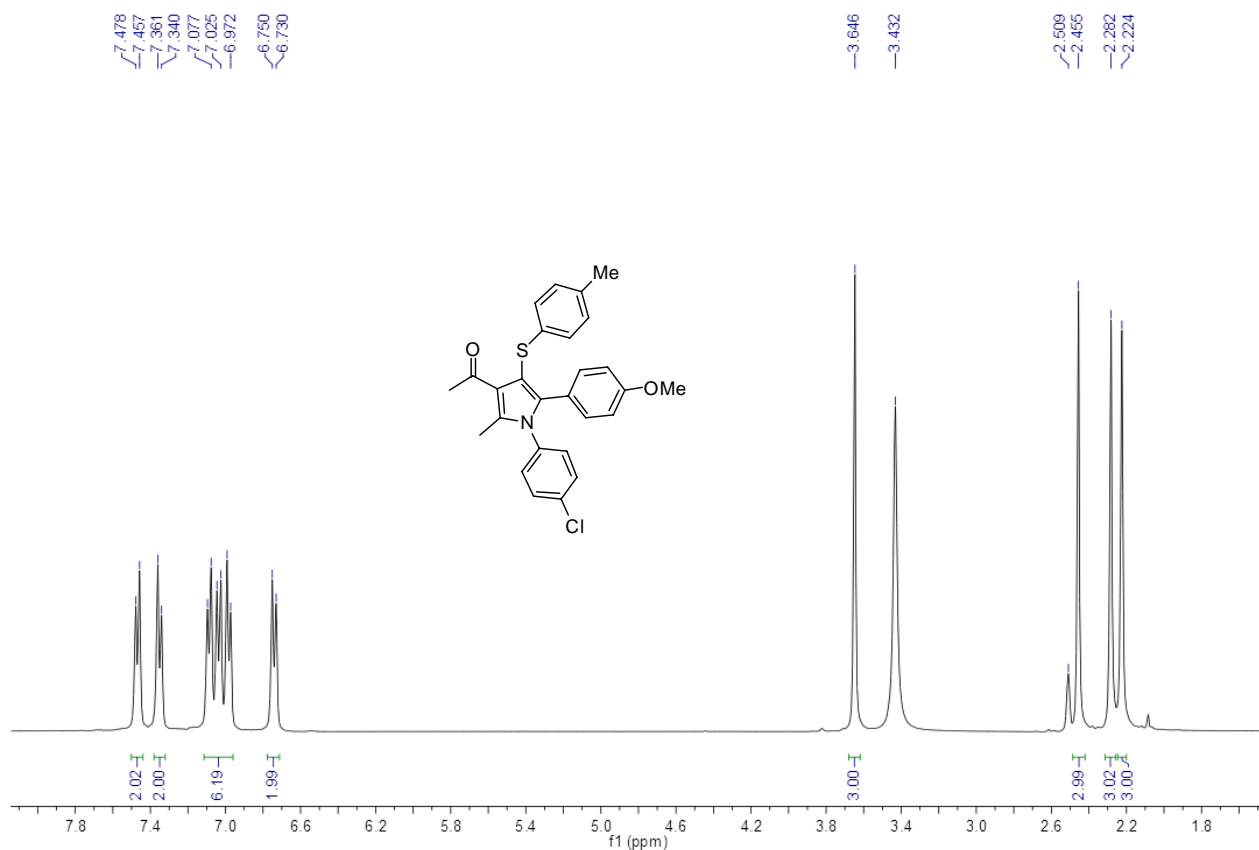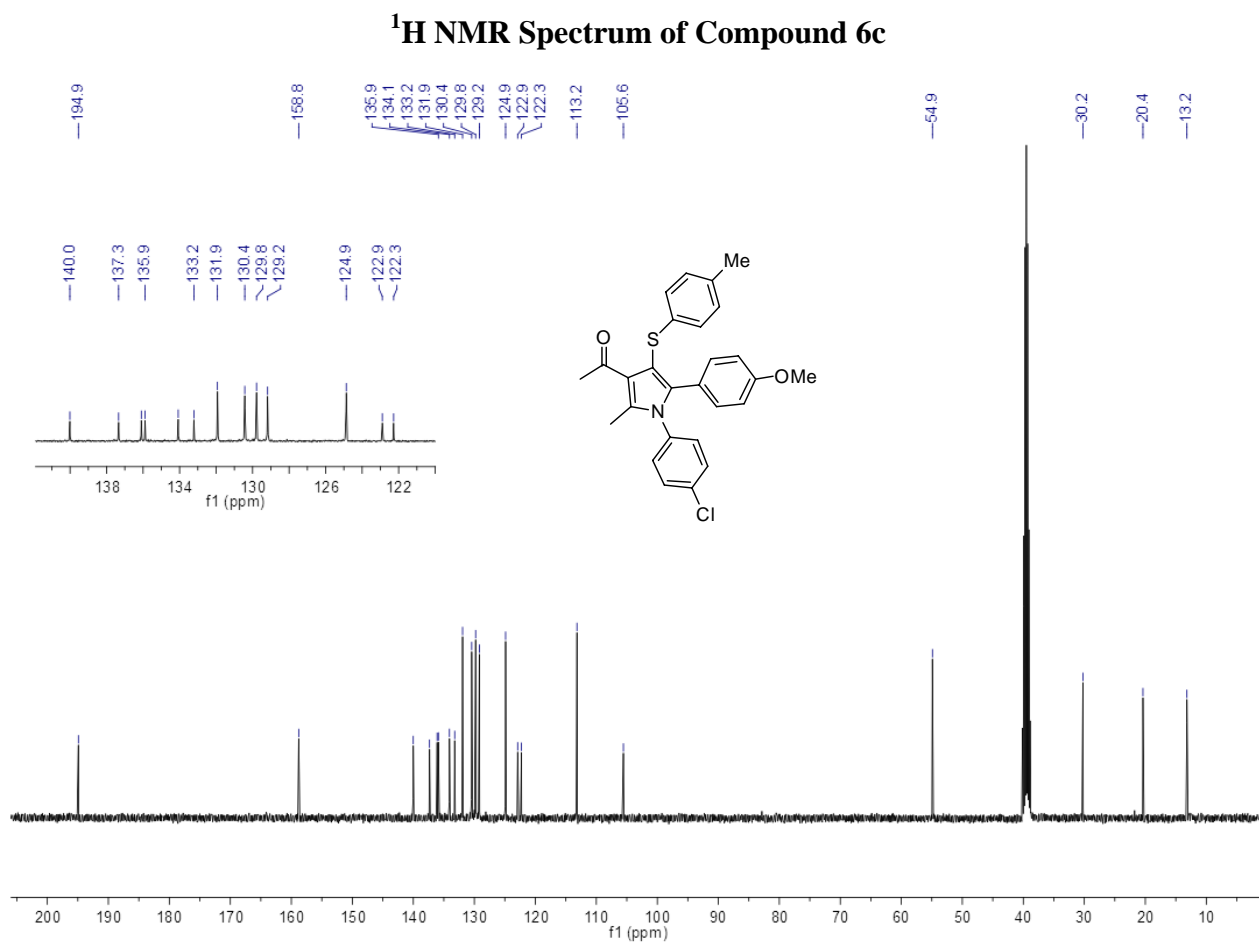

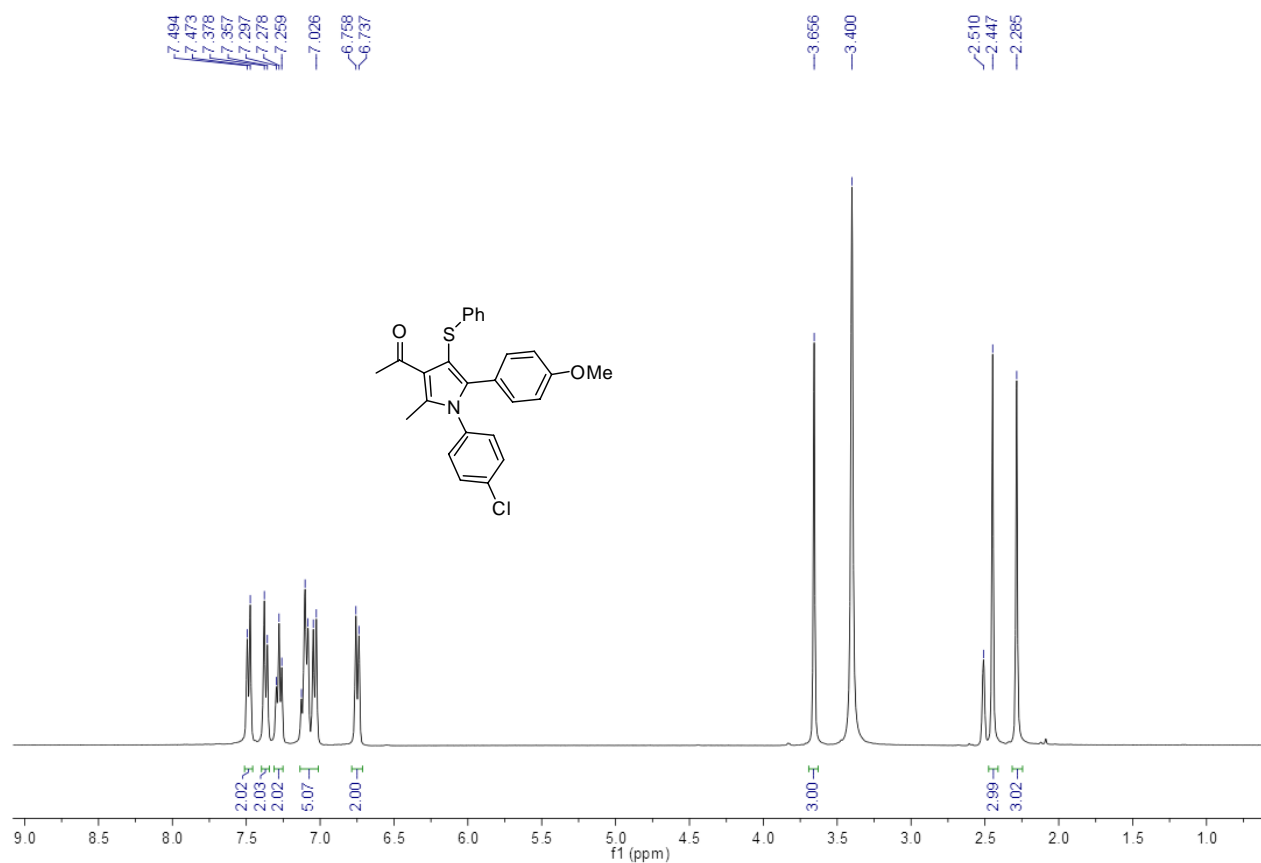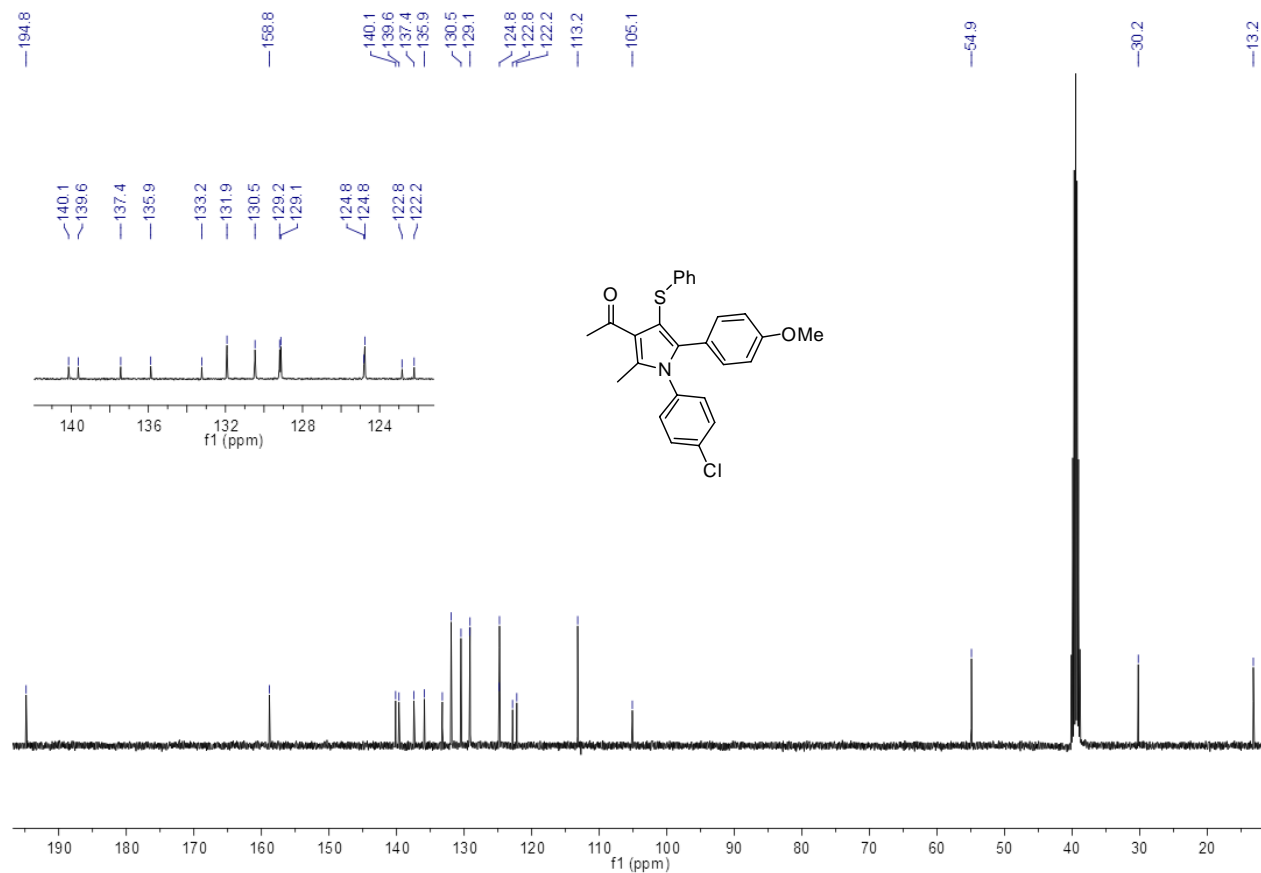

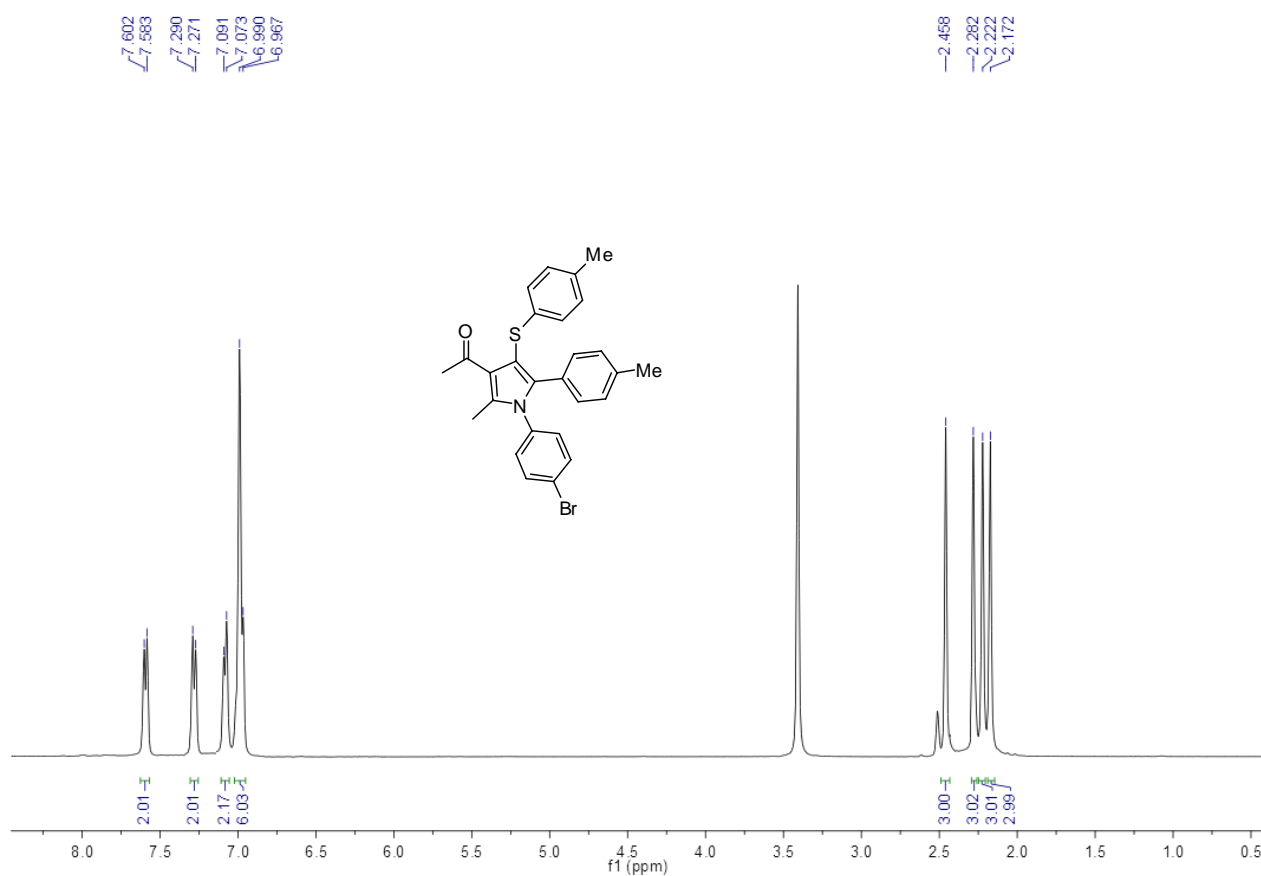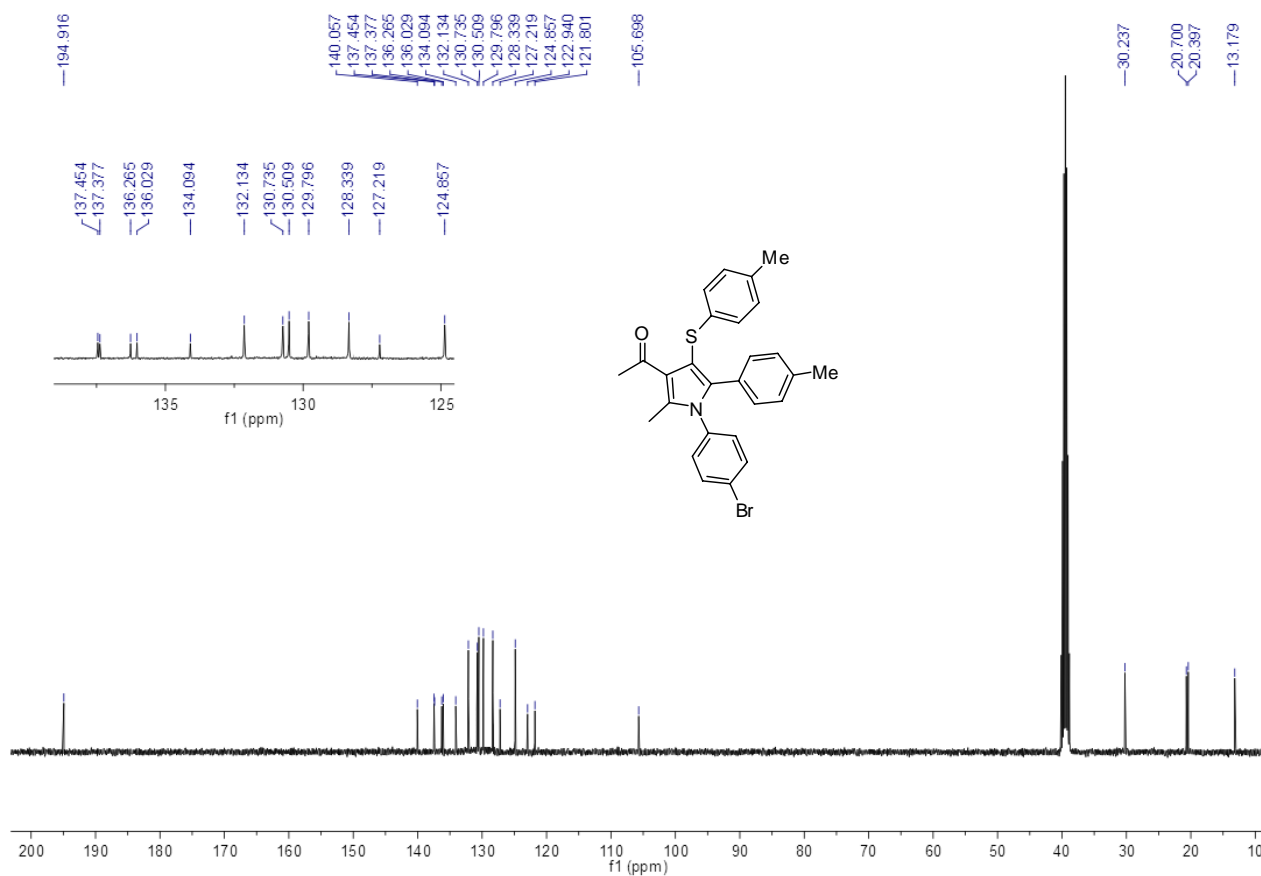

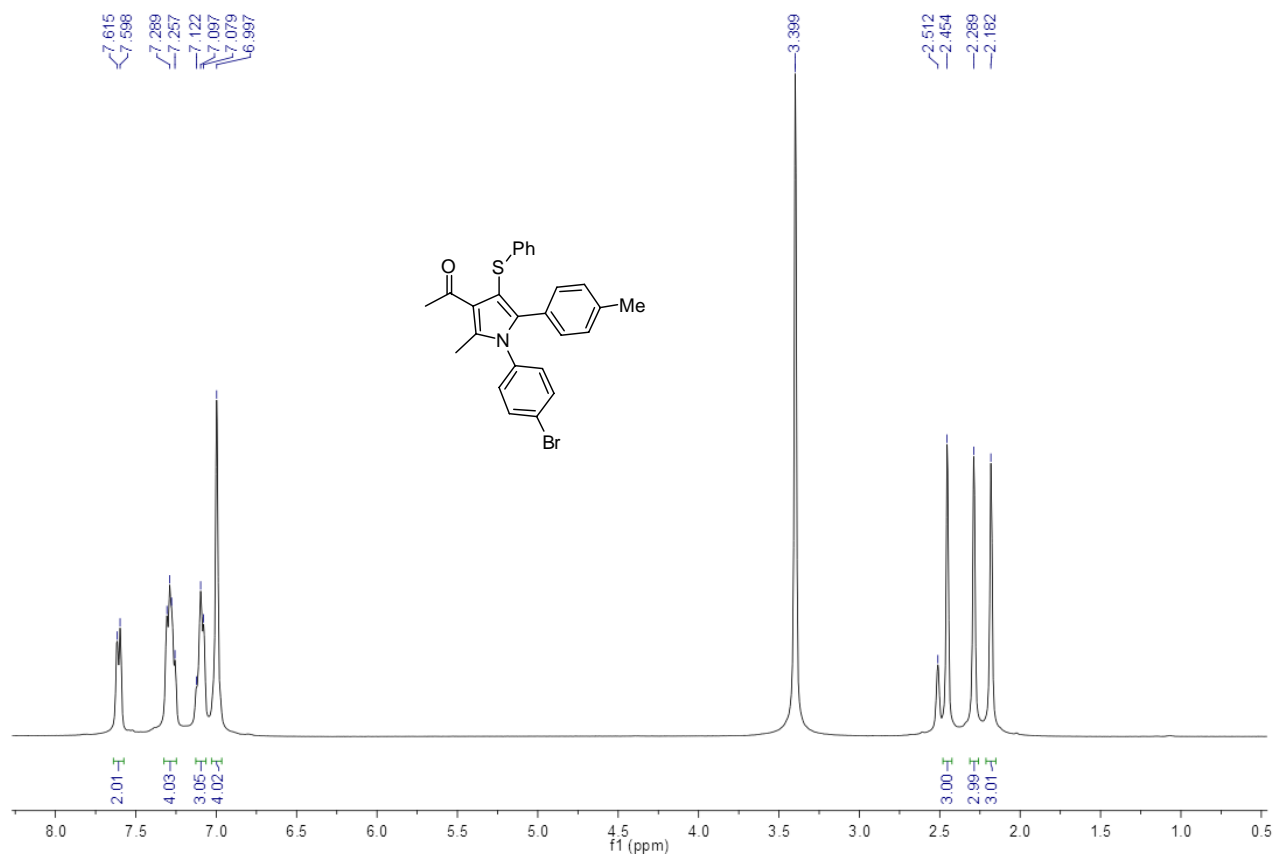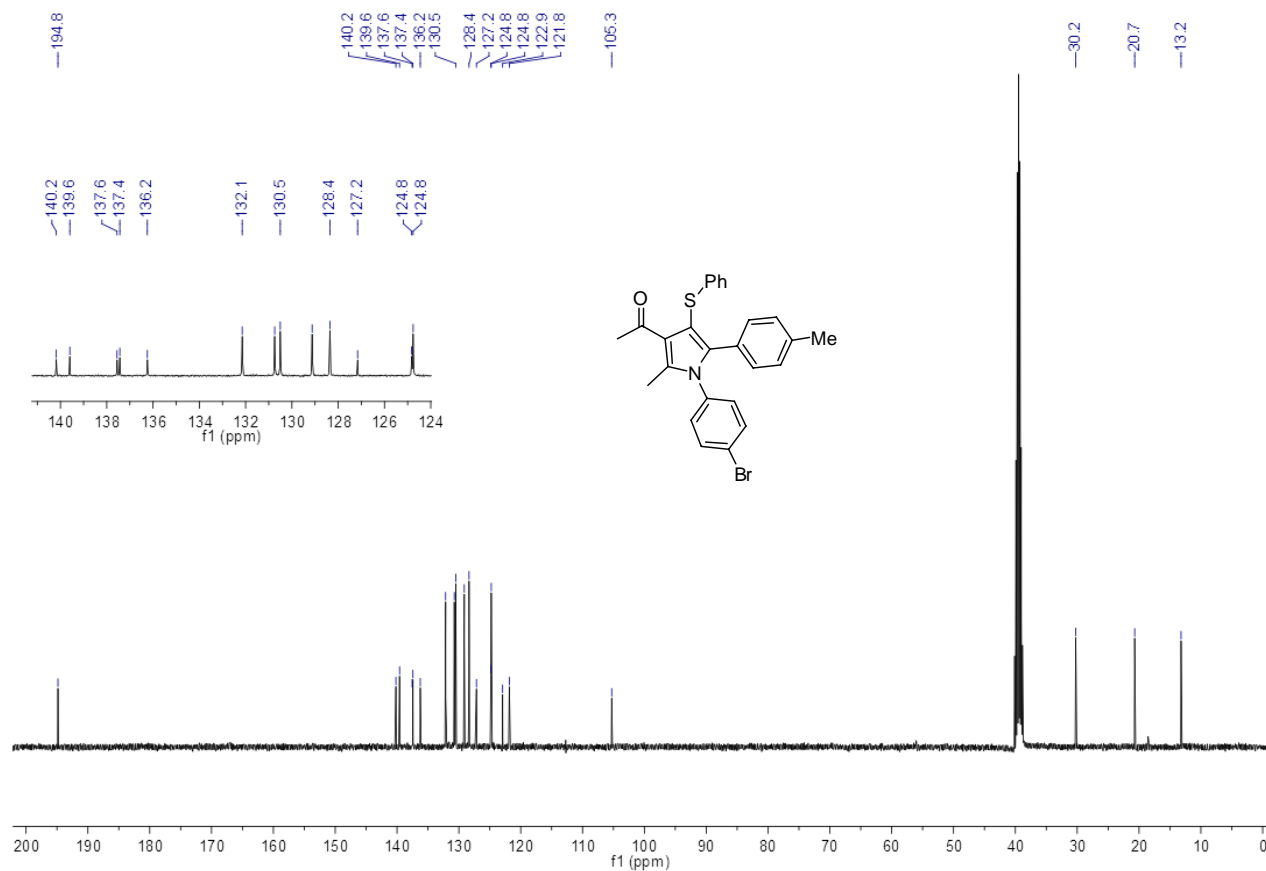

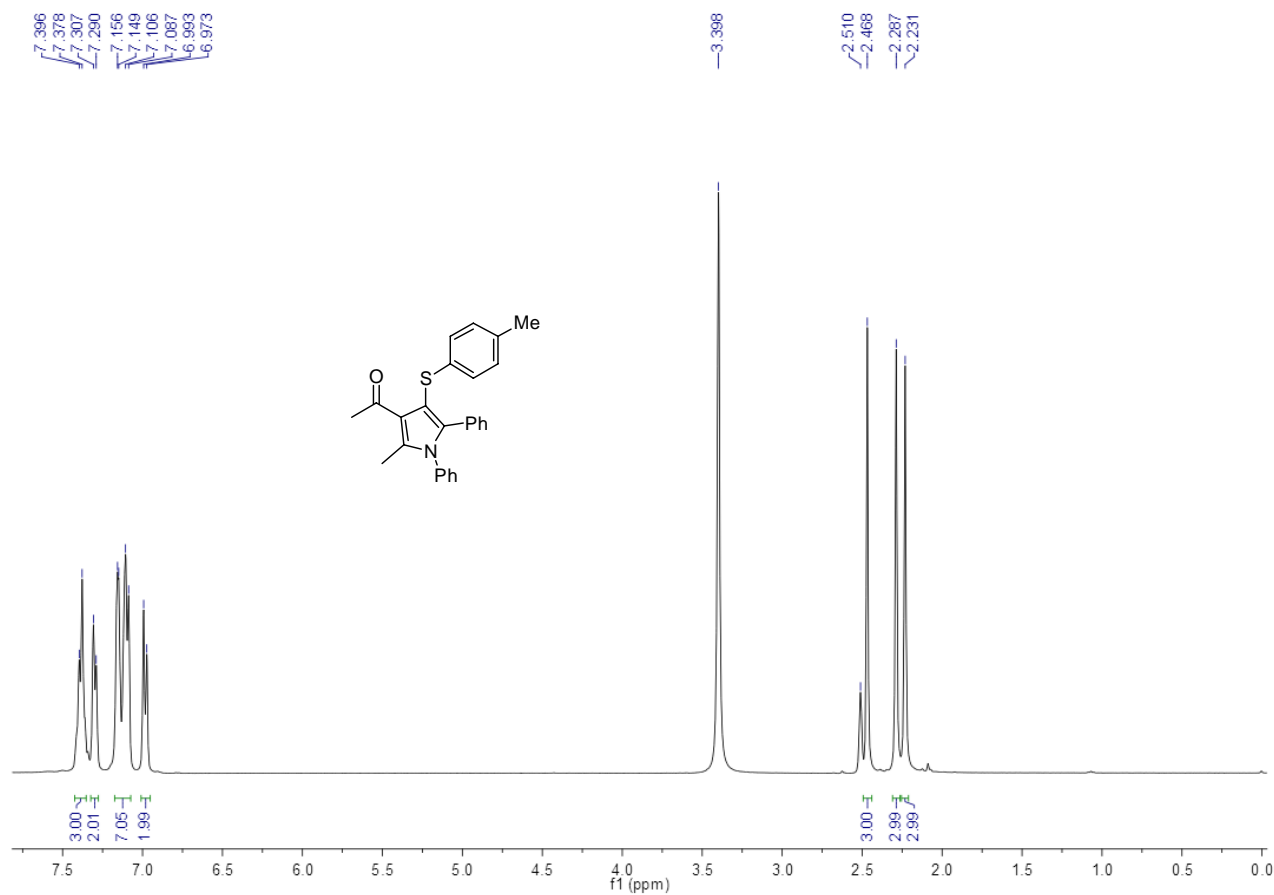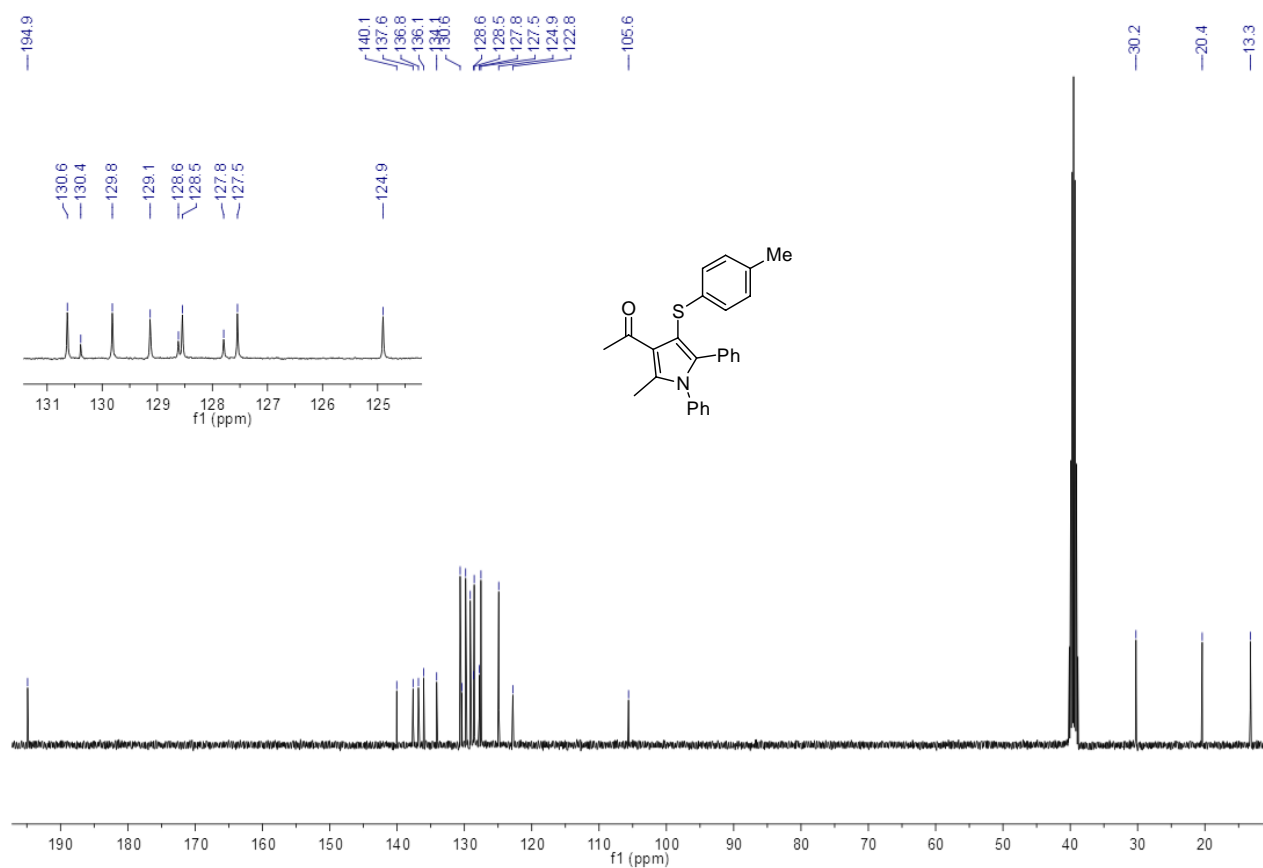



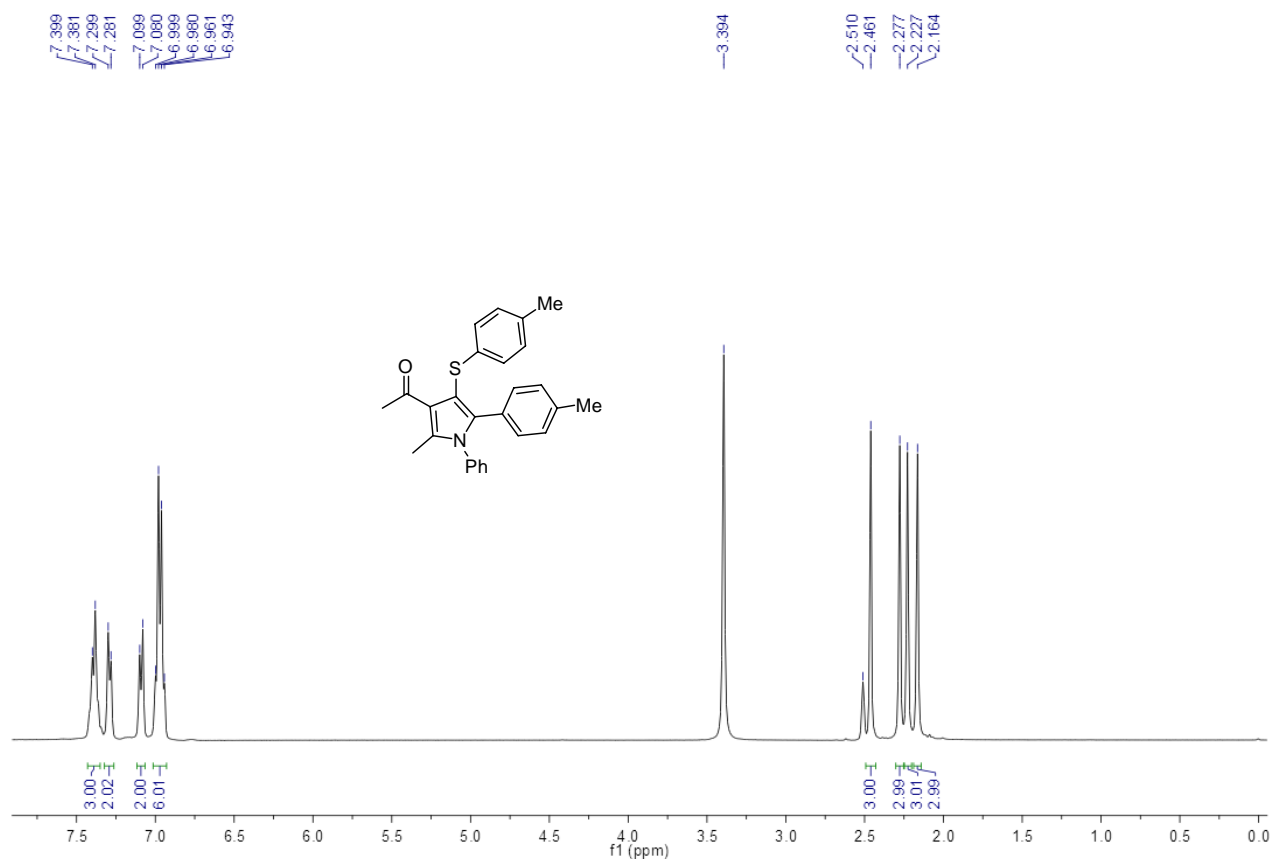

<sup>1</sup>H NMR Spectrum of Compound 6h

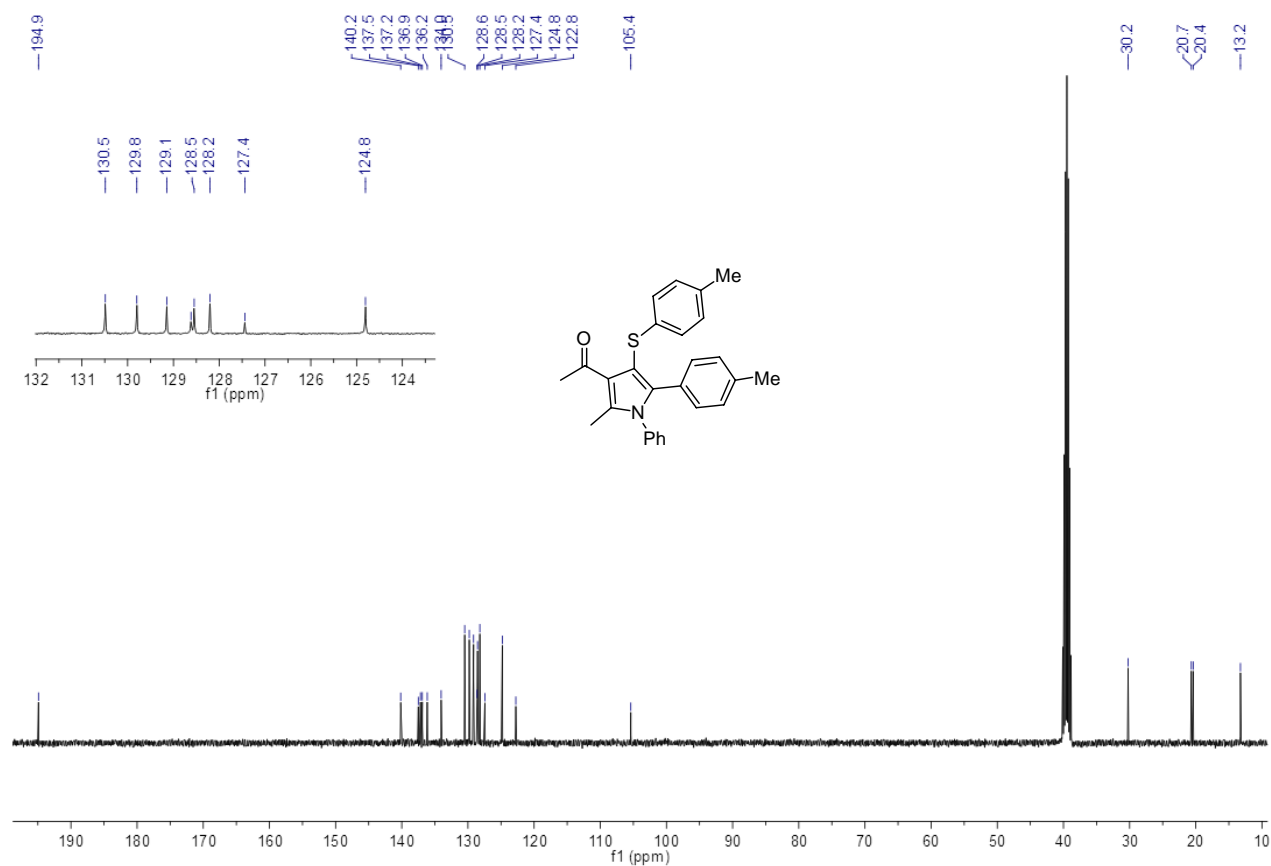

<sup>13</sup>C NMR Spectrum of Compound 6h

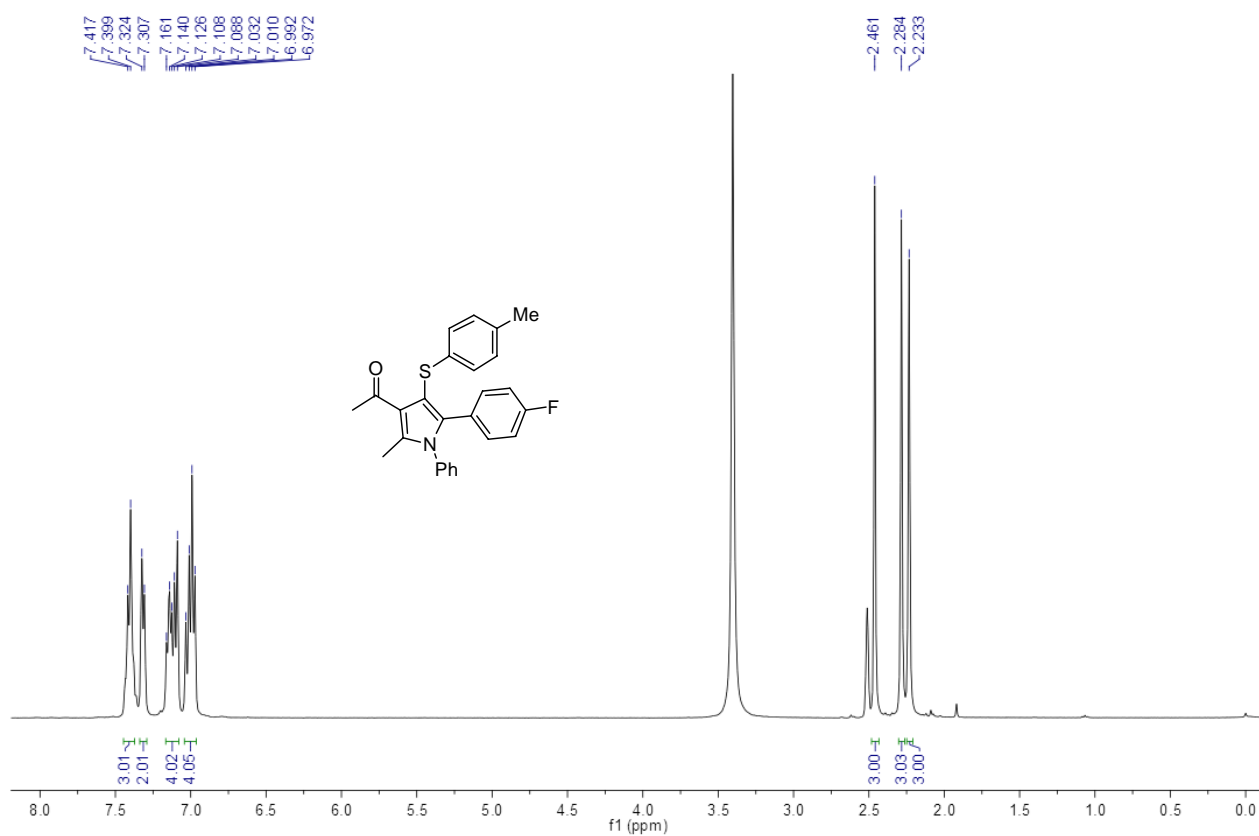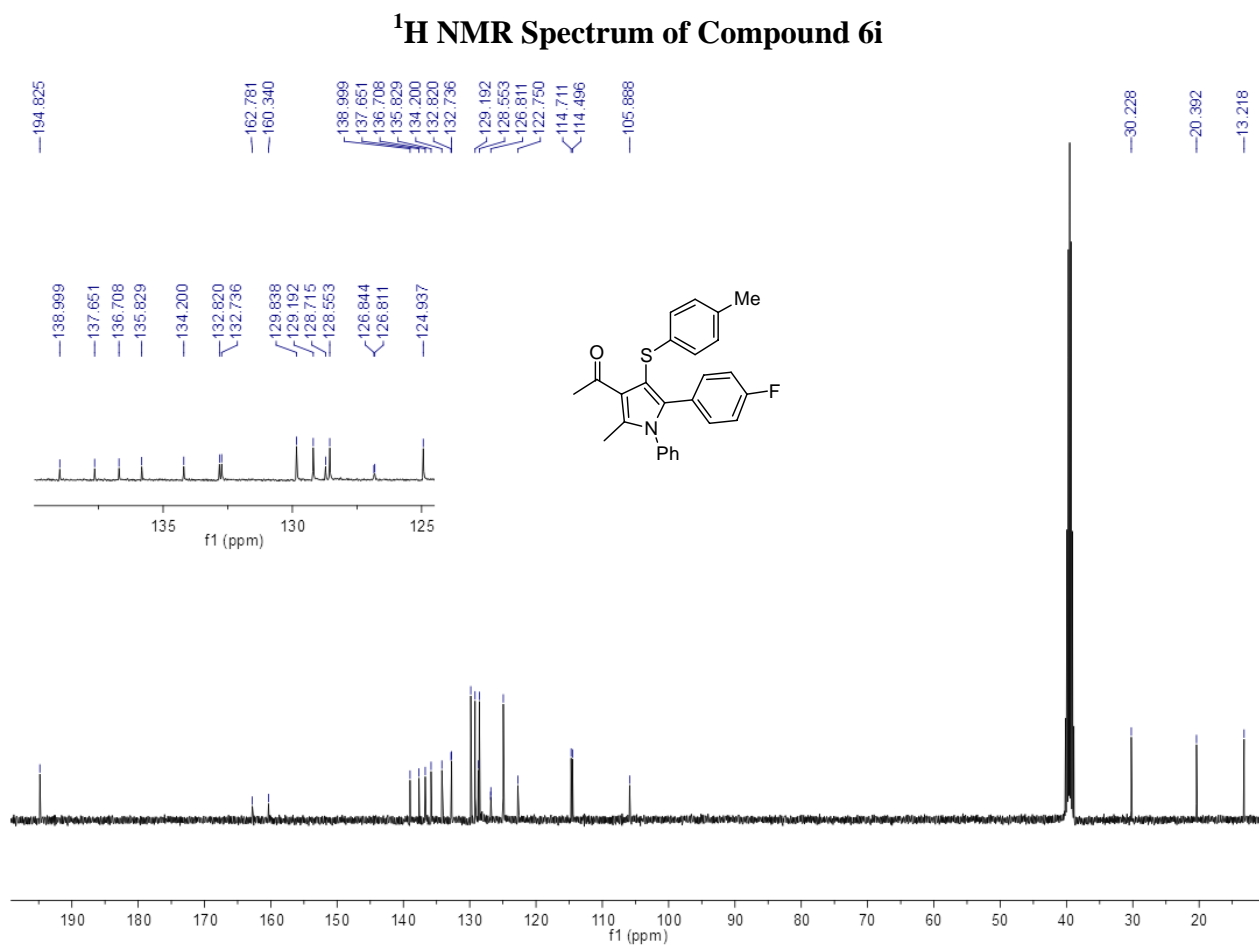

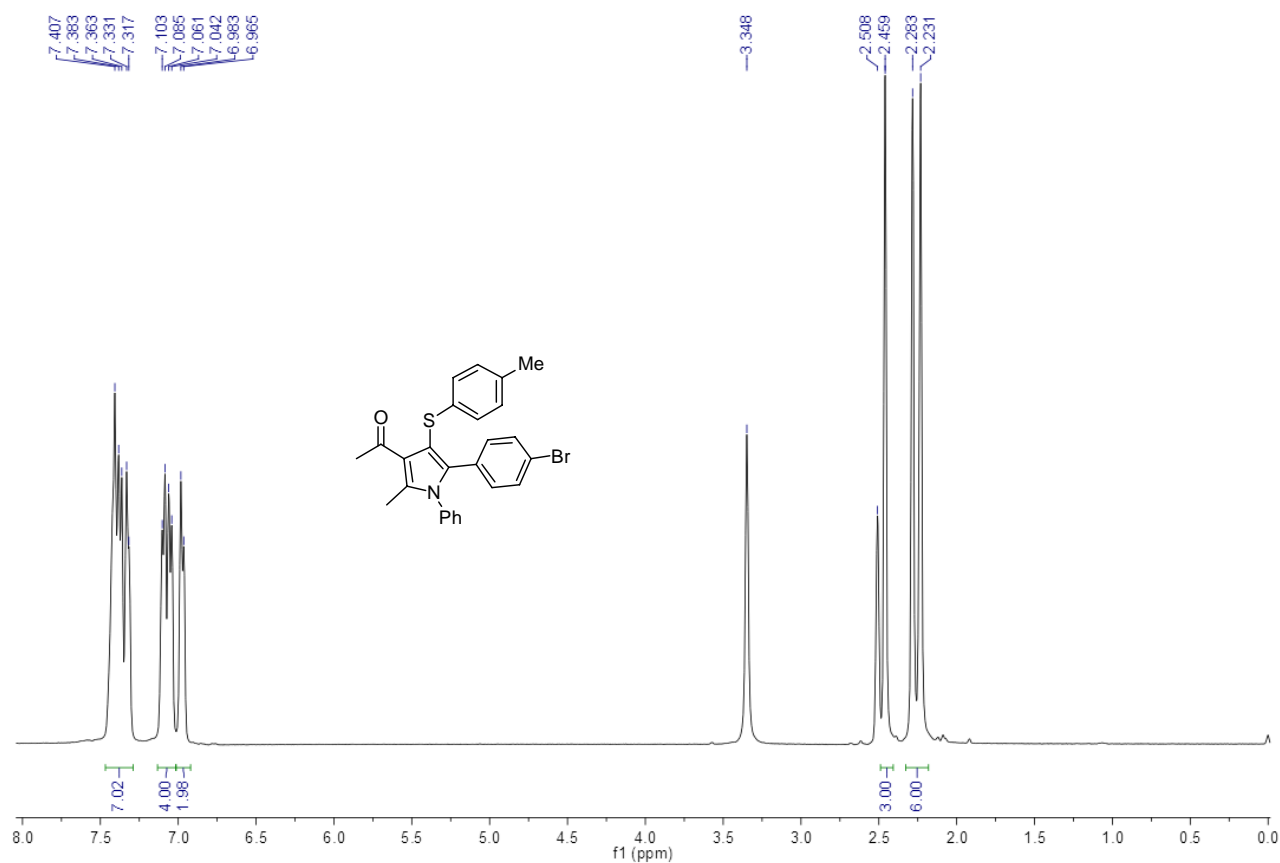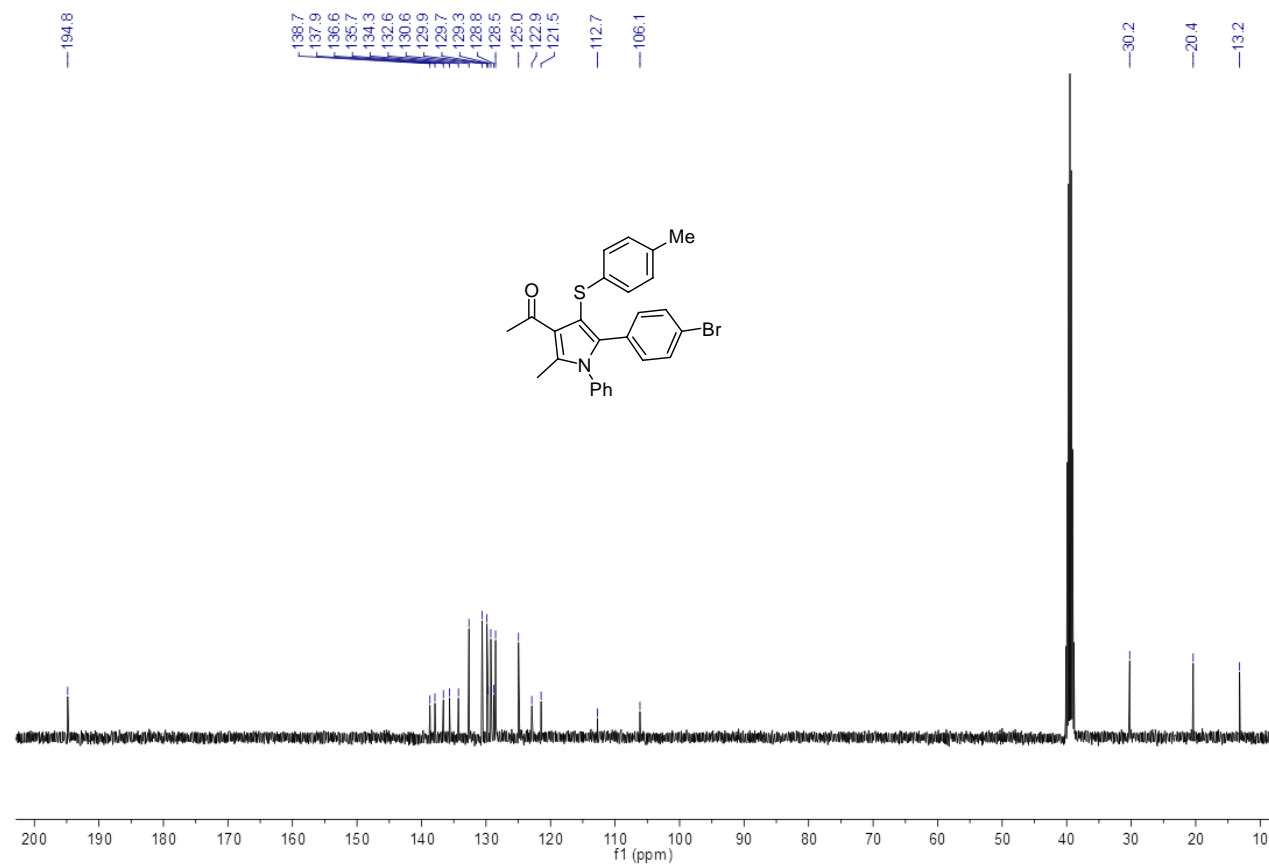

**<sup>13</sup>C NMR Spectrum of Compound 6j**

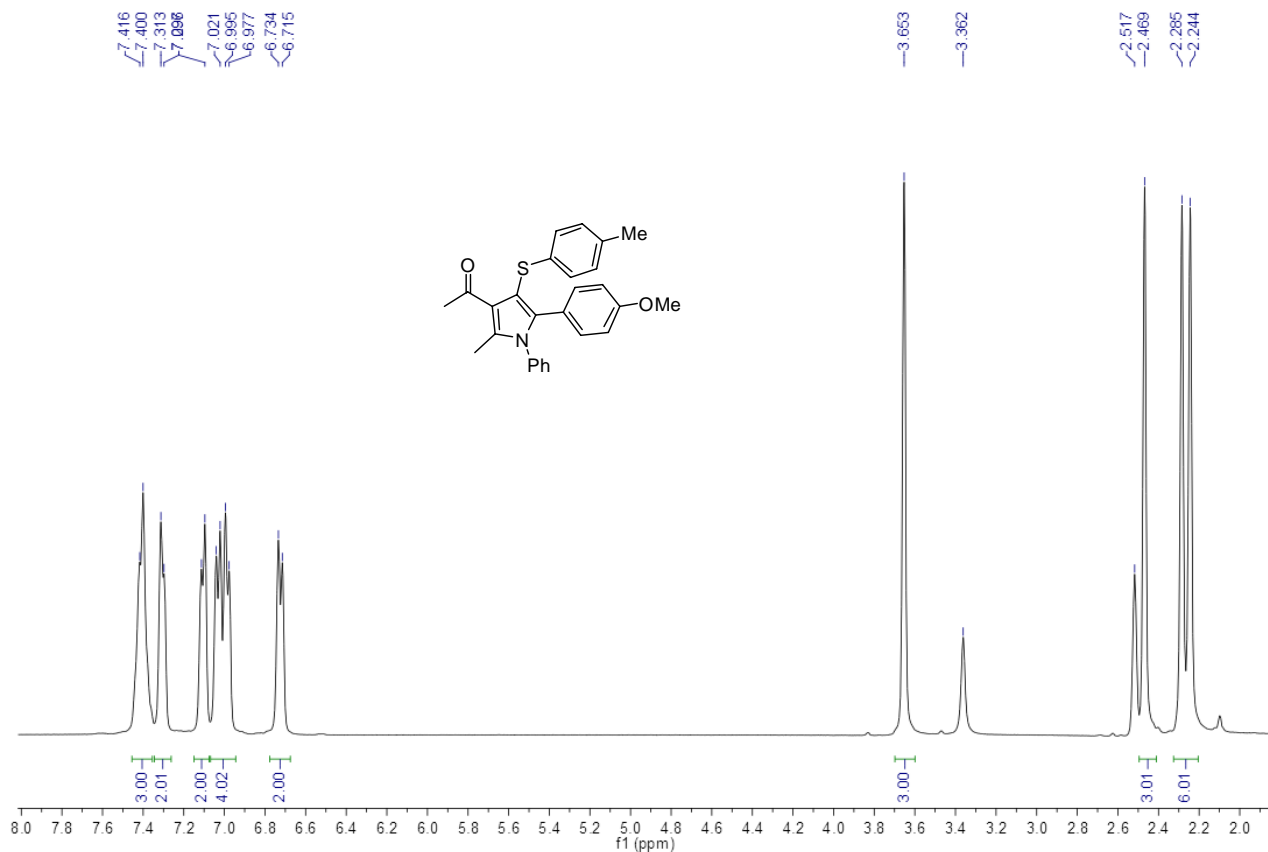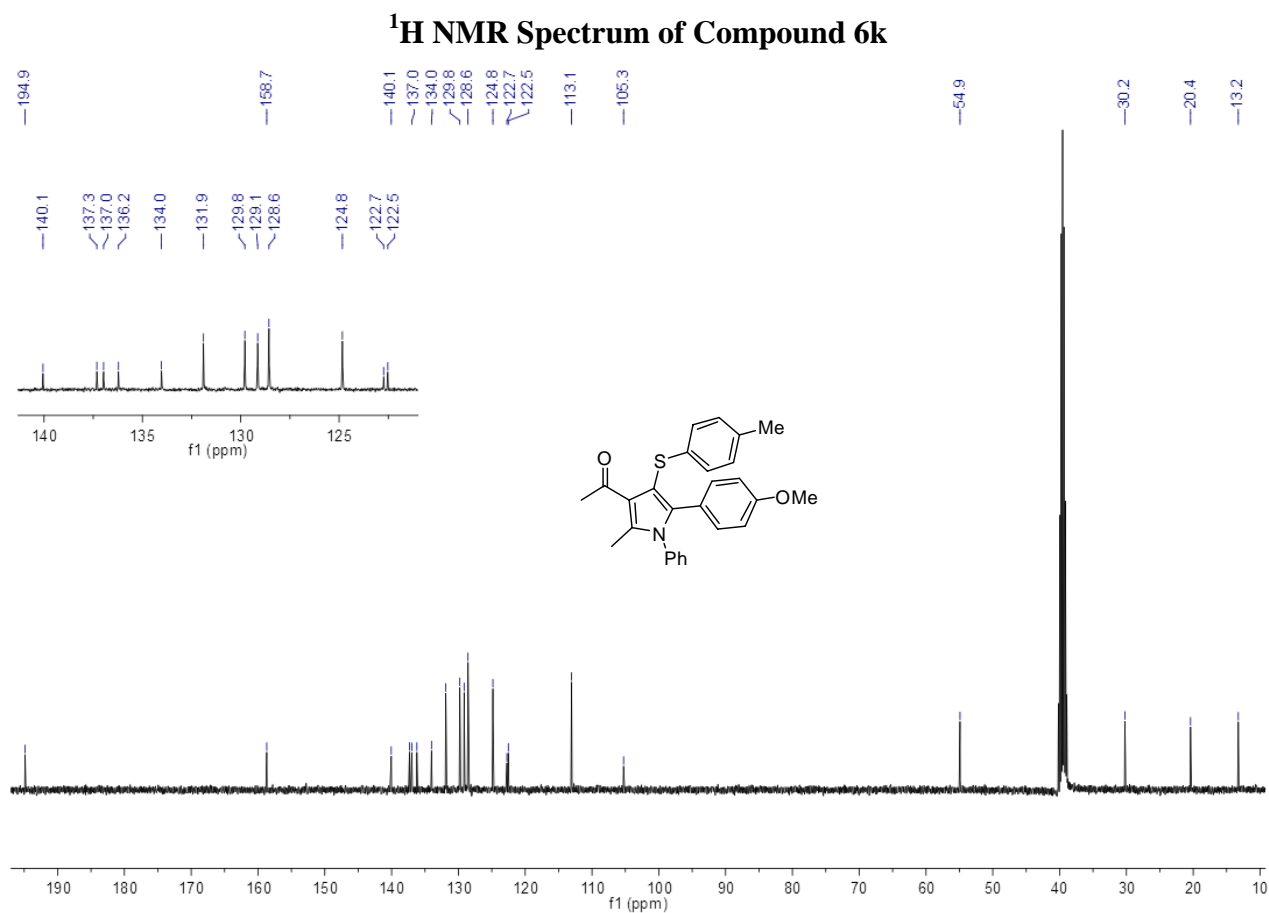

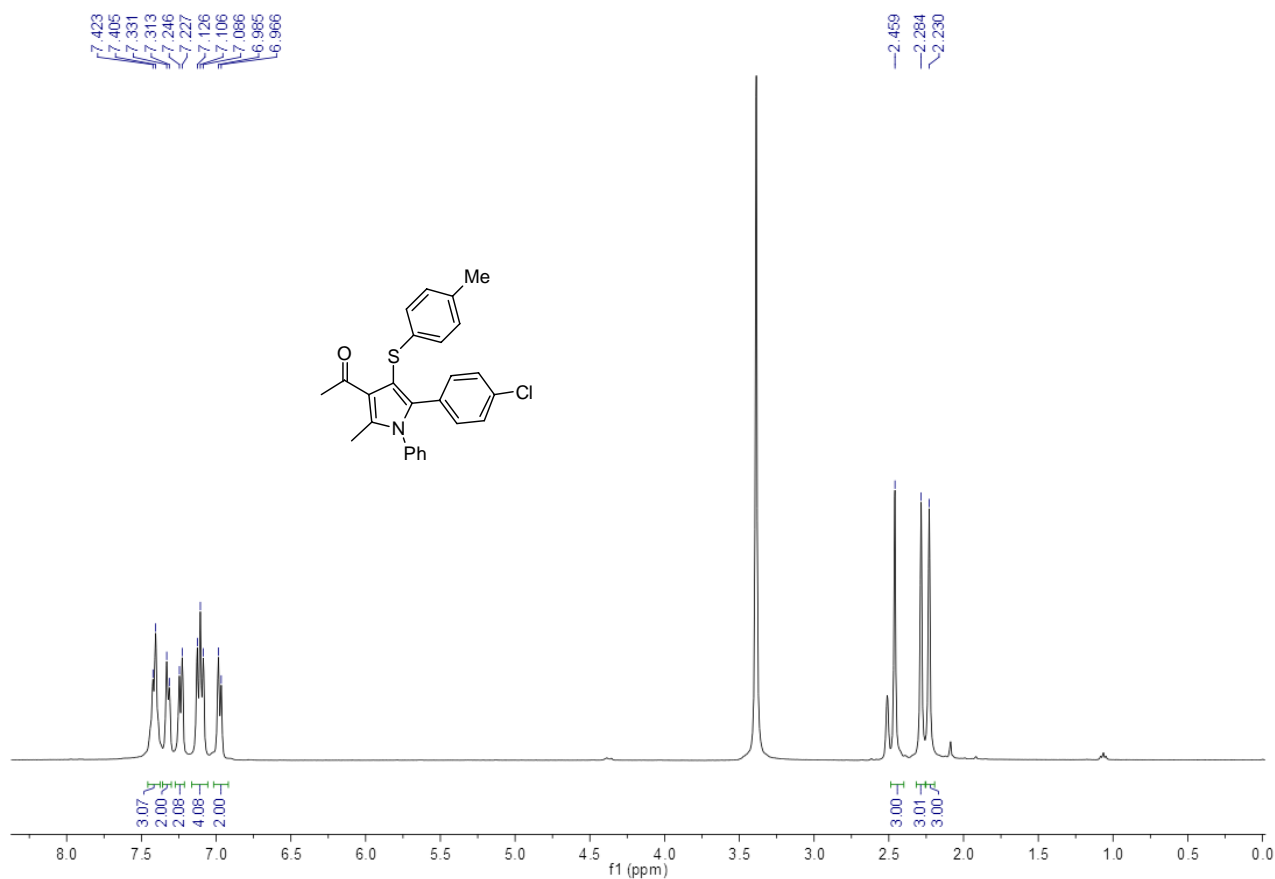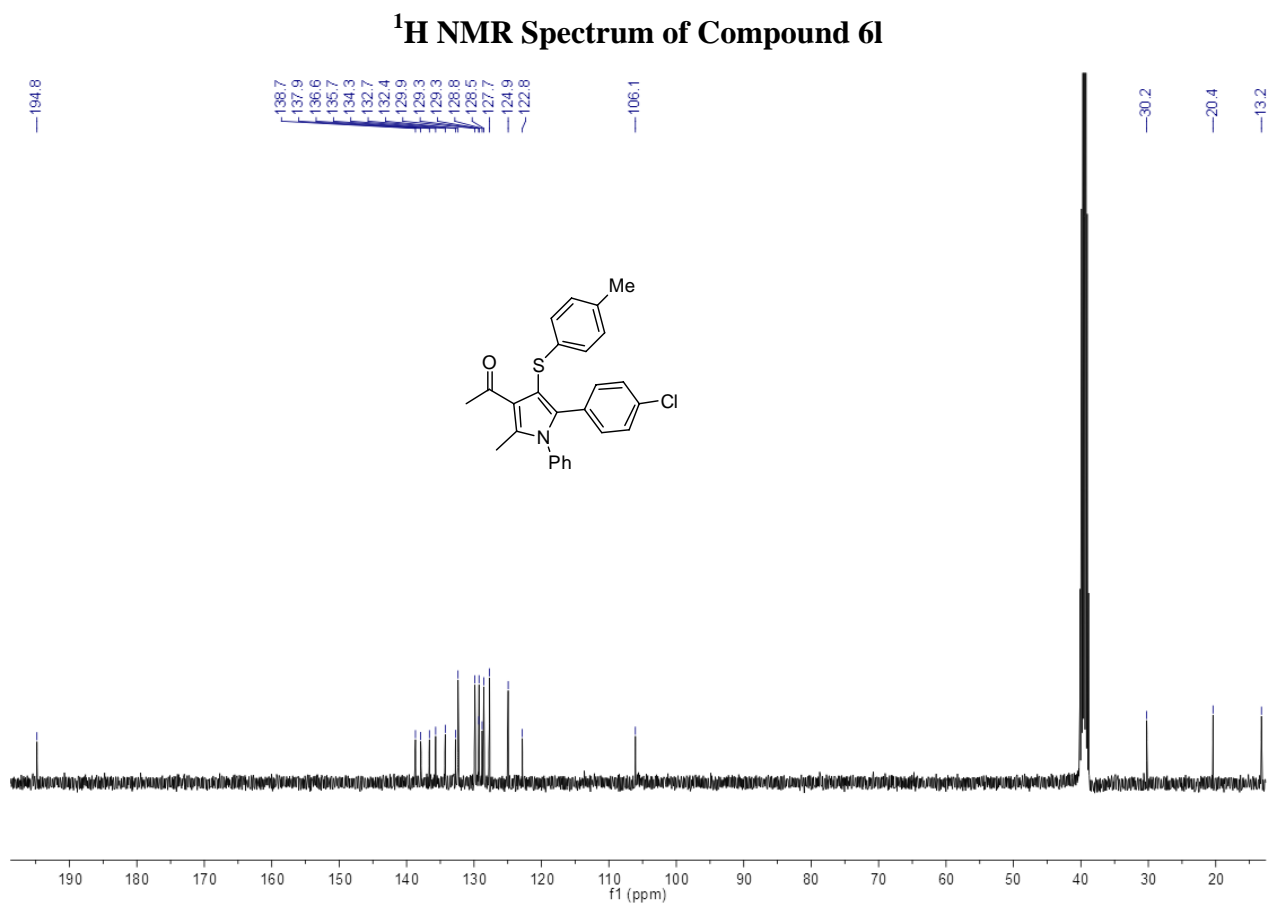

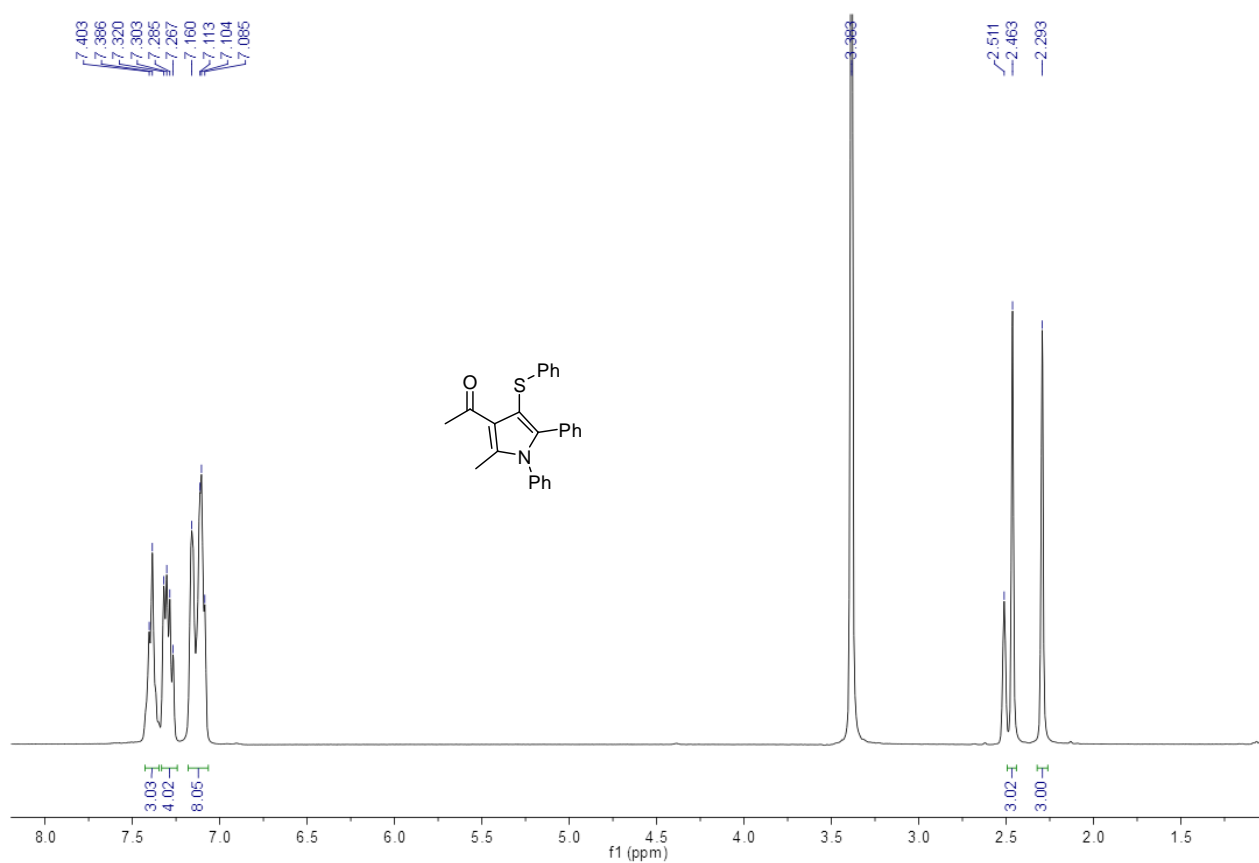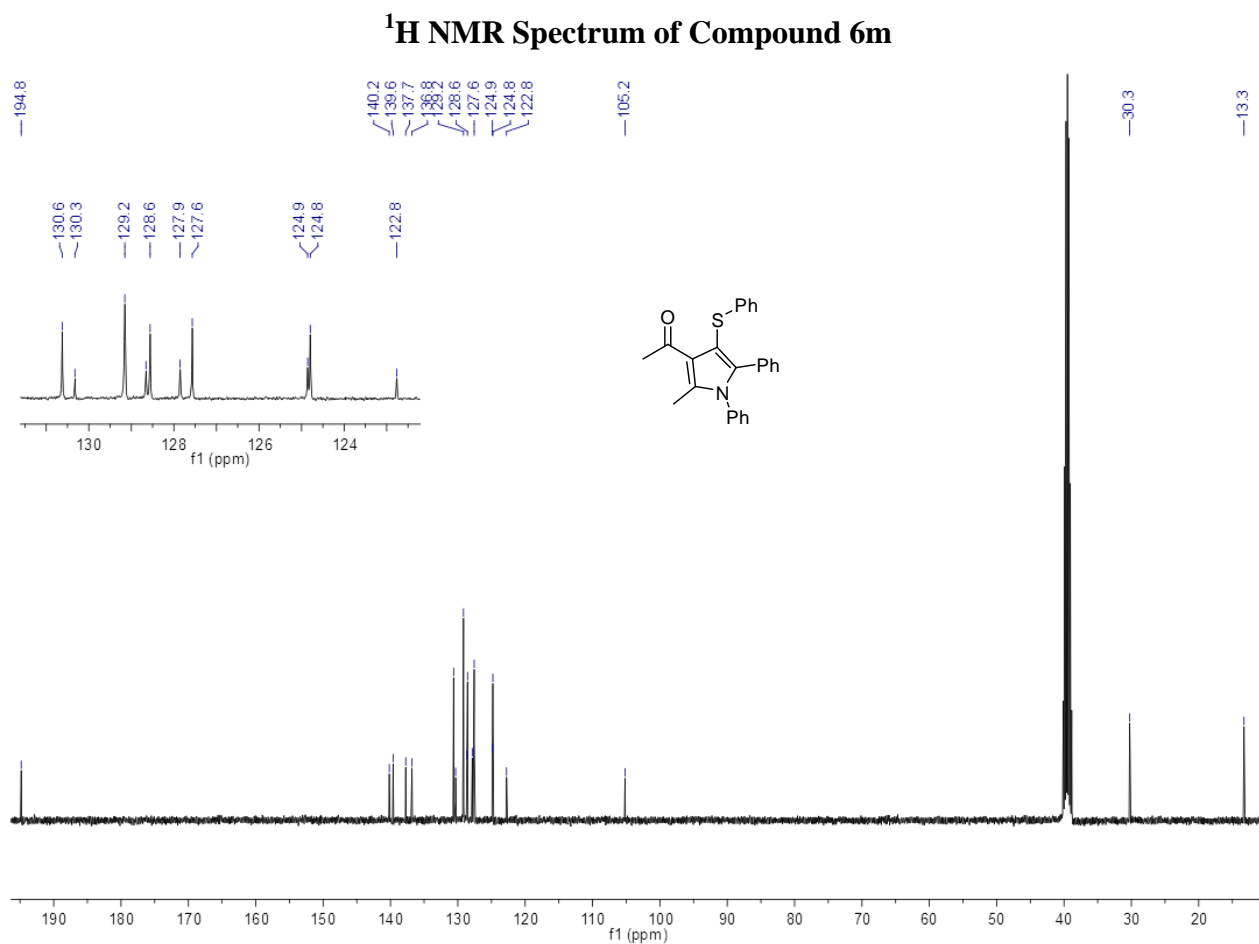

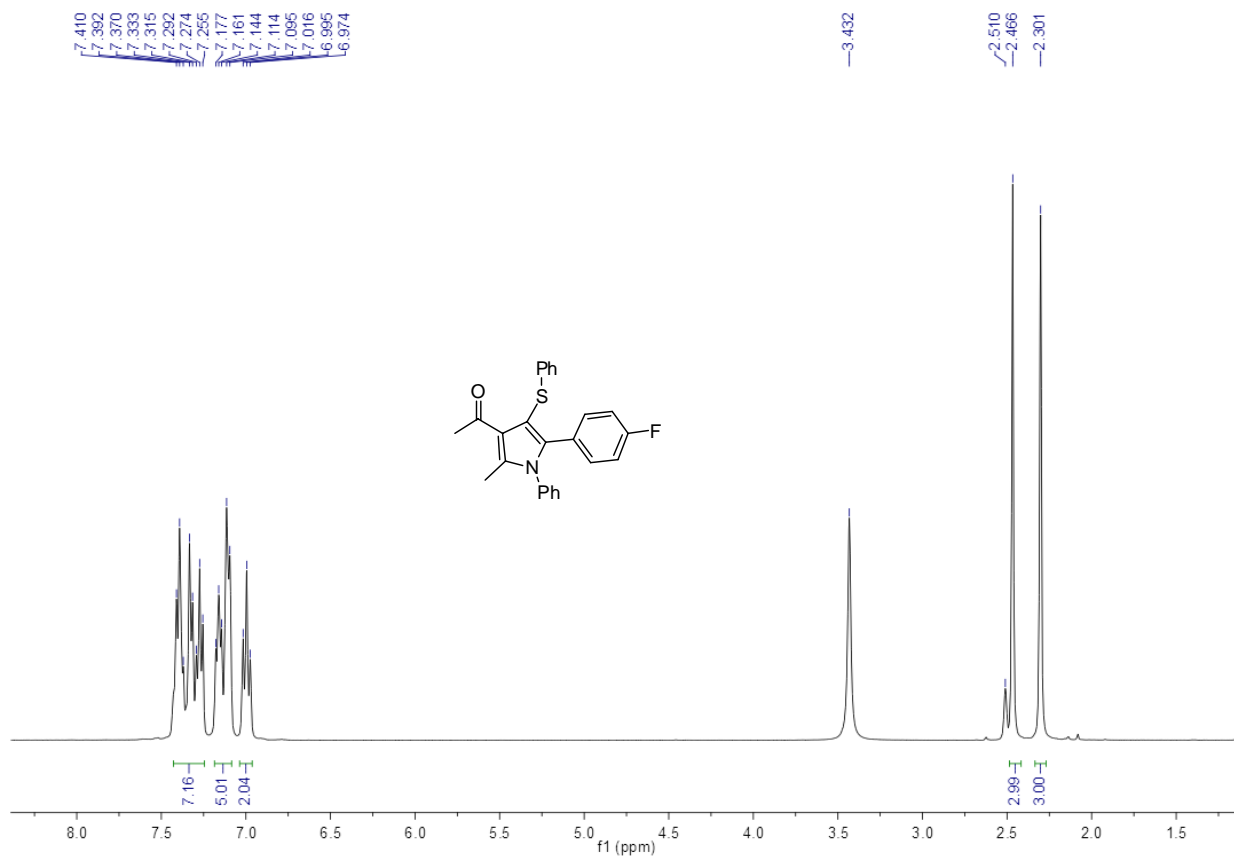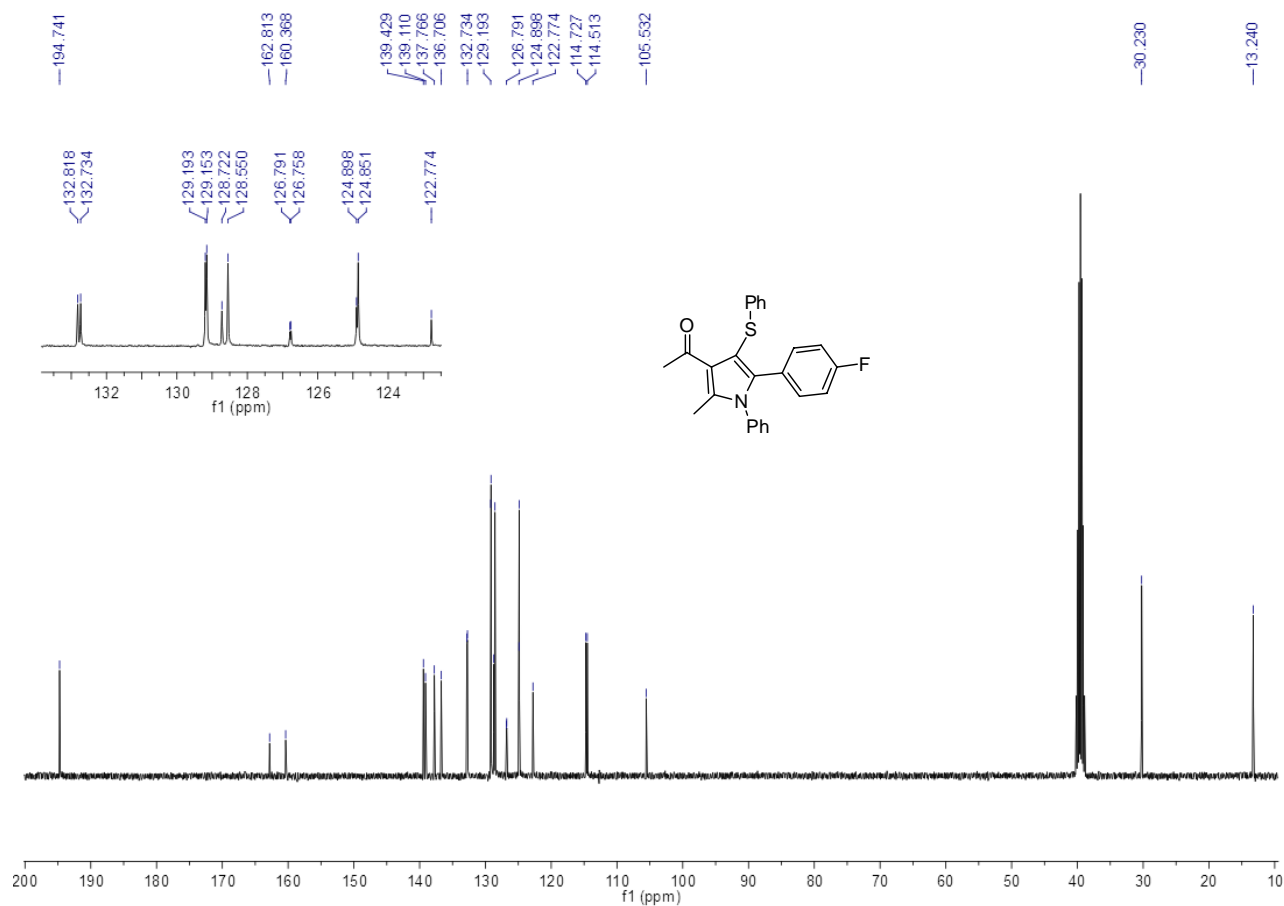

**<sup>13</sup>C NMR Spectrum of Compound 6n**

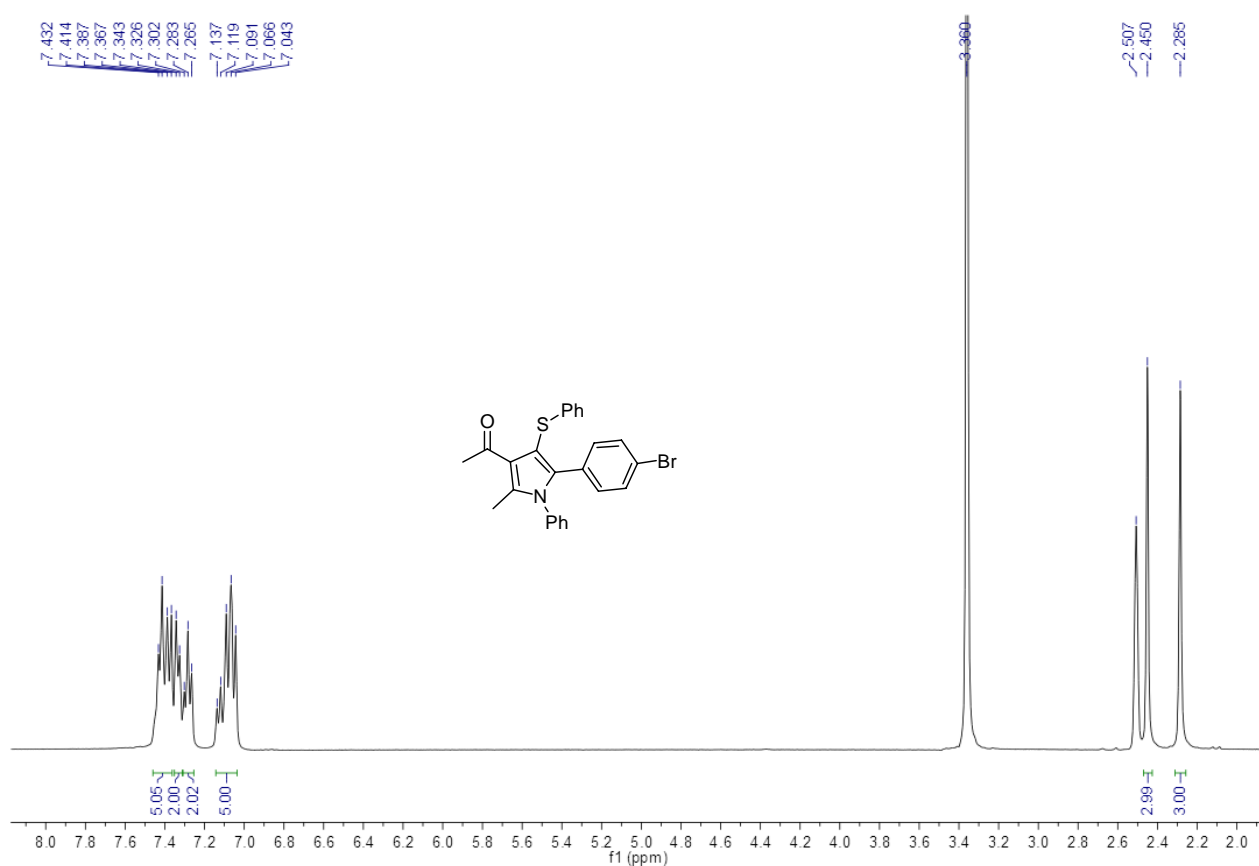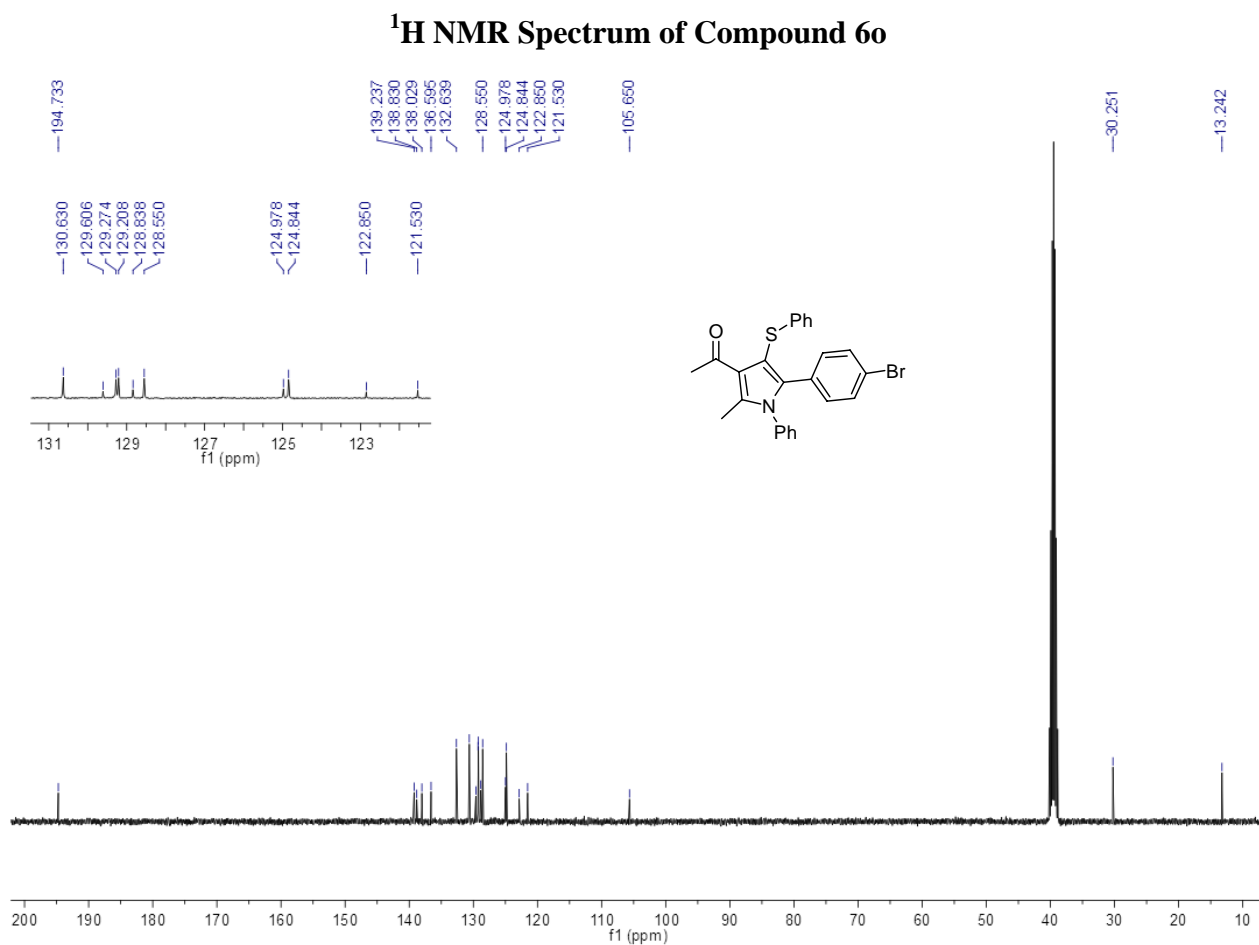



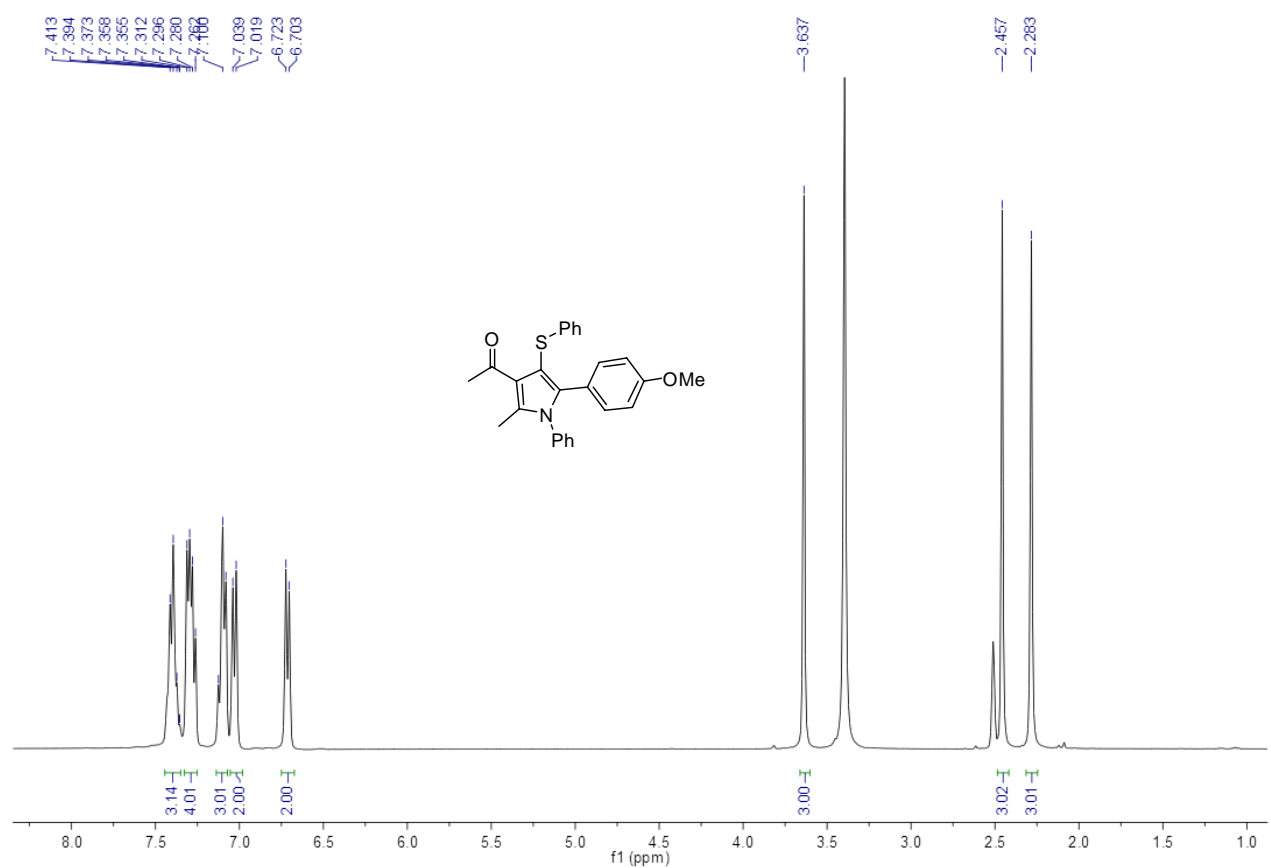

<sup>1</sup>H NMR Spectrum of Compound 6p

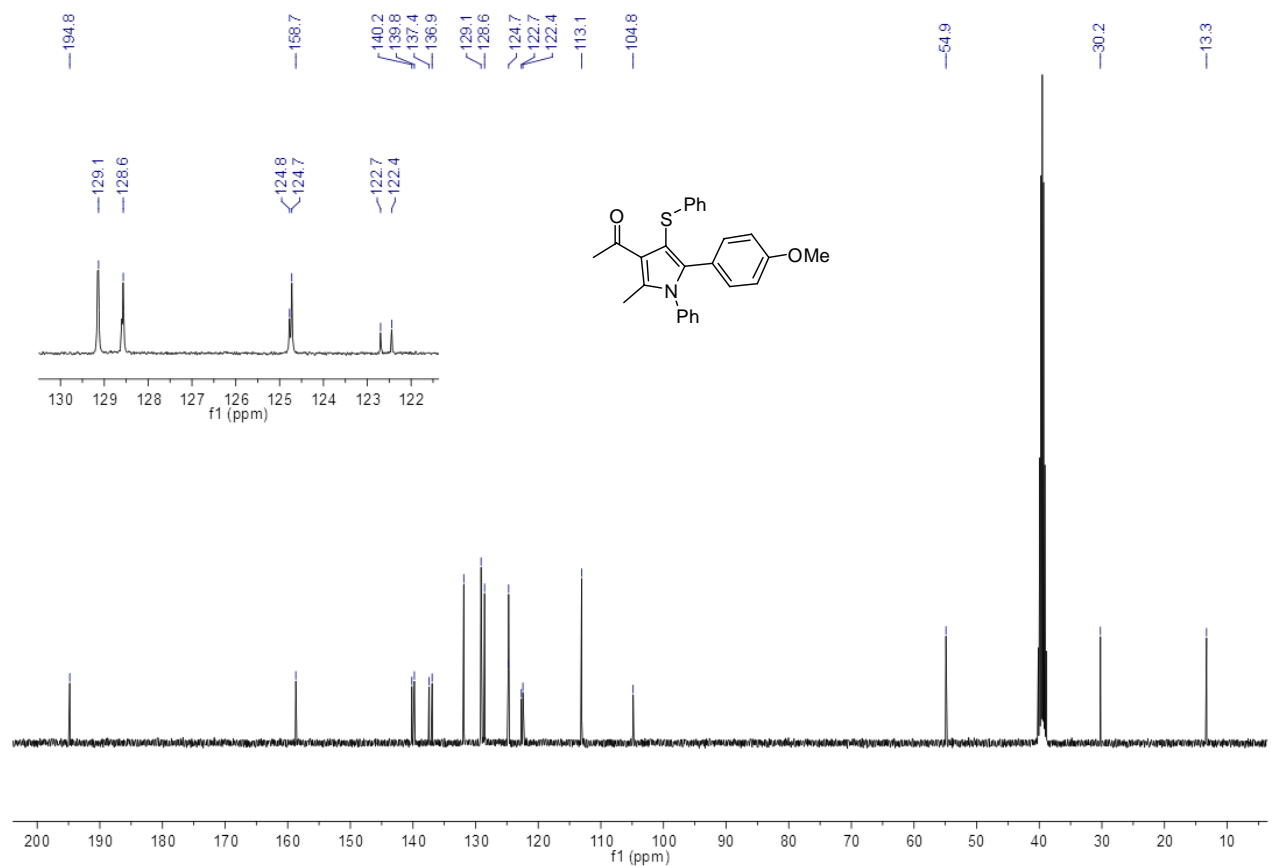

<sup>13</sup>C NMR Spectrum of Compound 6p

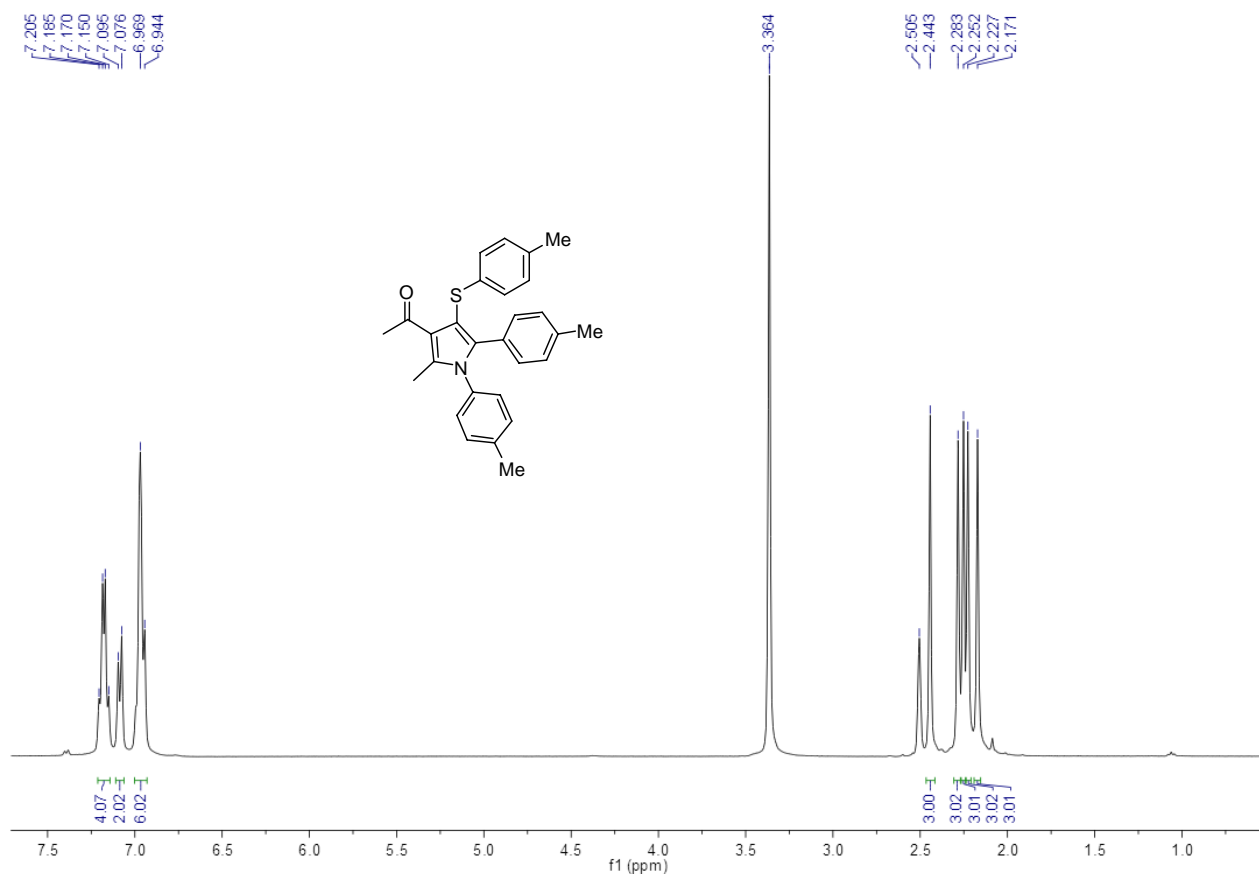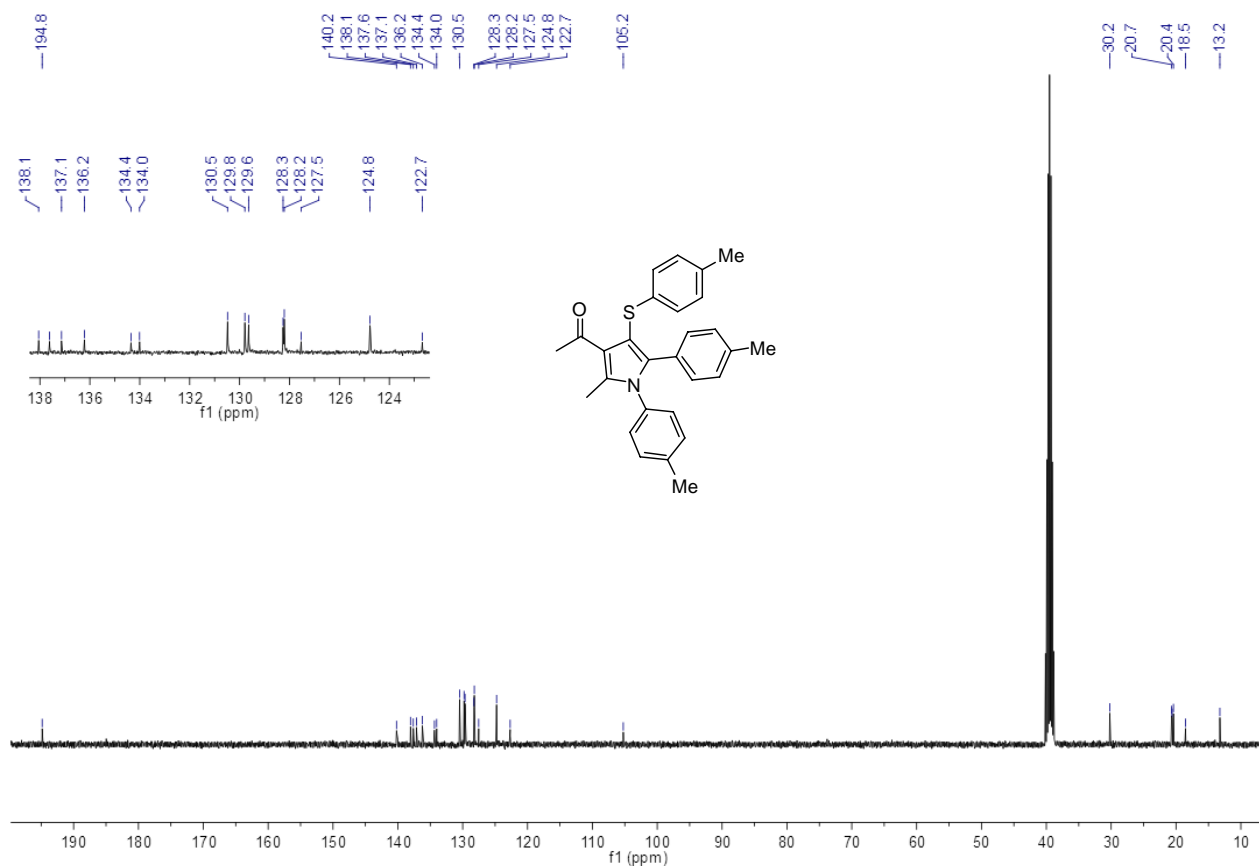

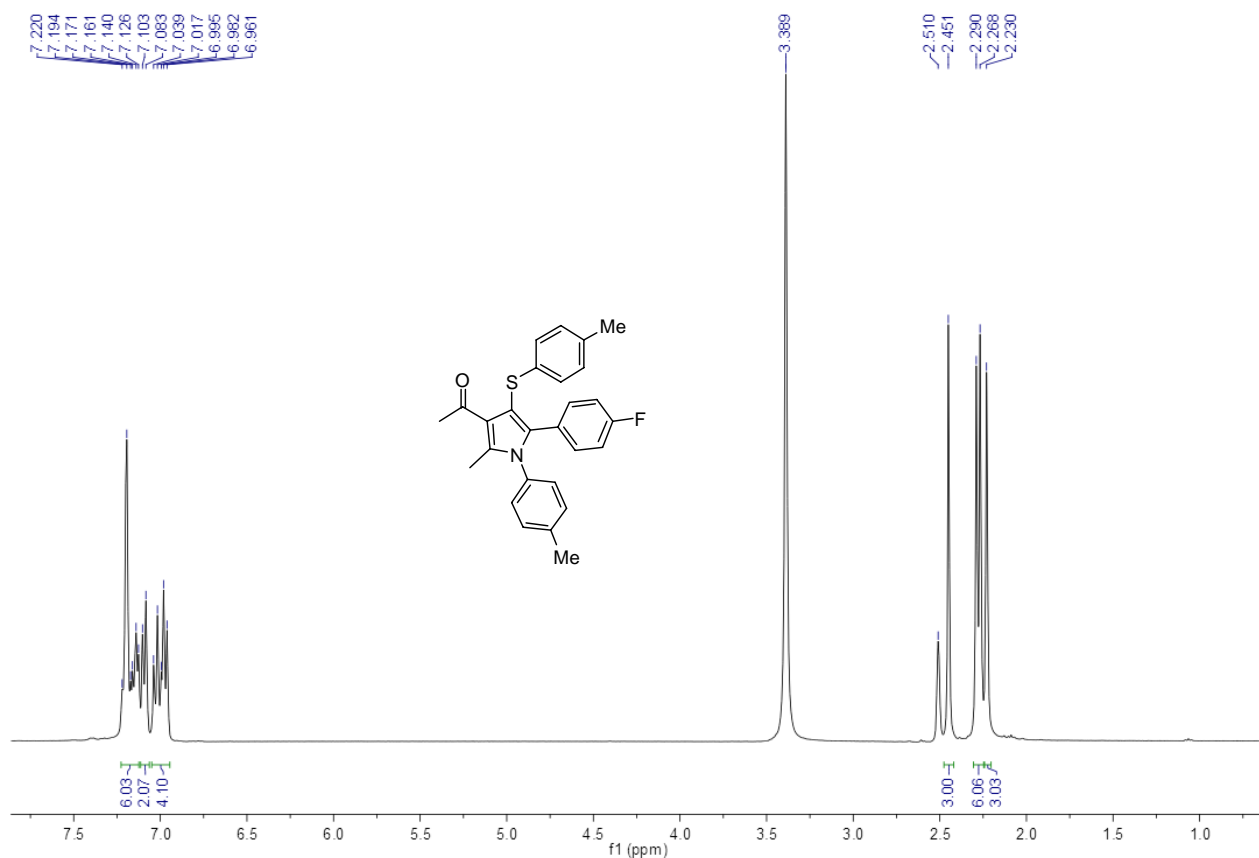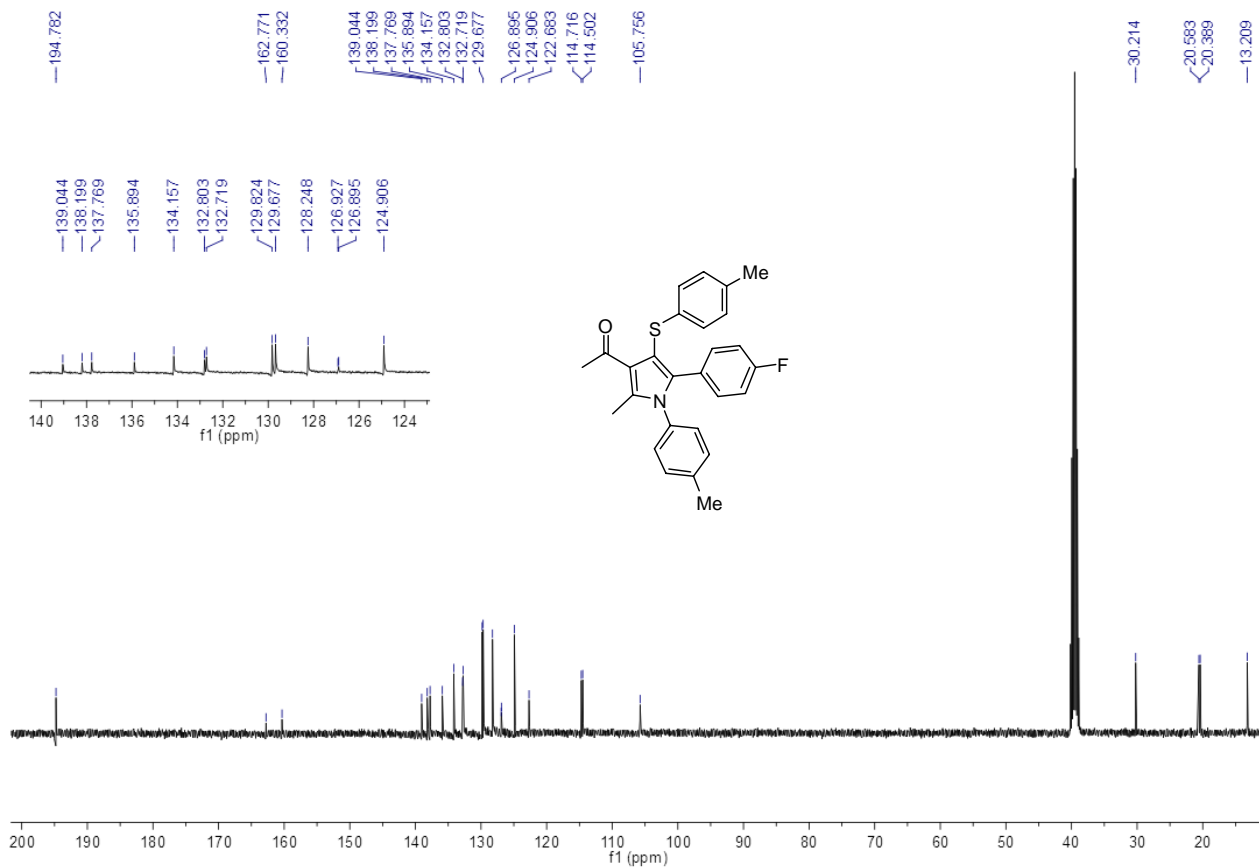

**<sup>13</sup>C NMR Spectrum of Compound 6r**

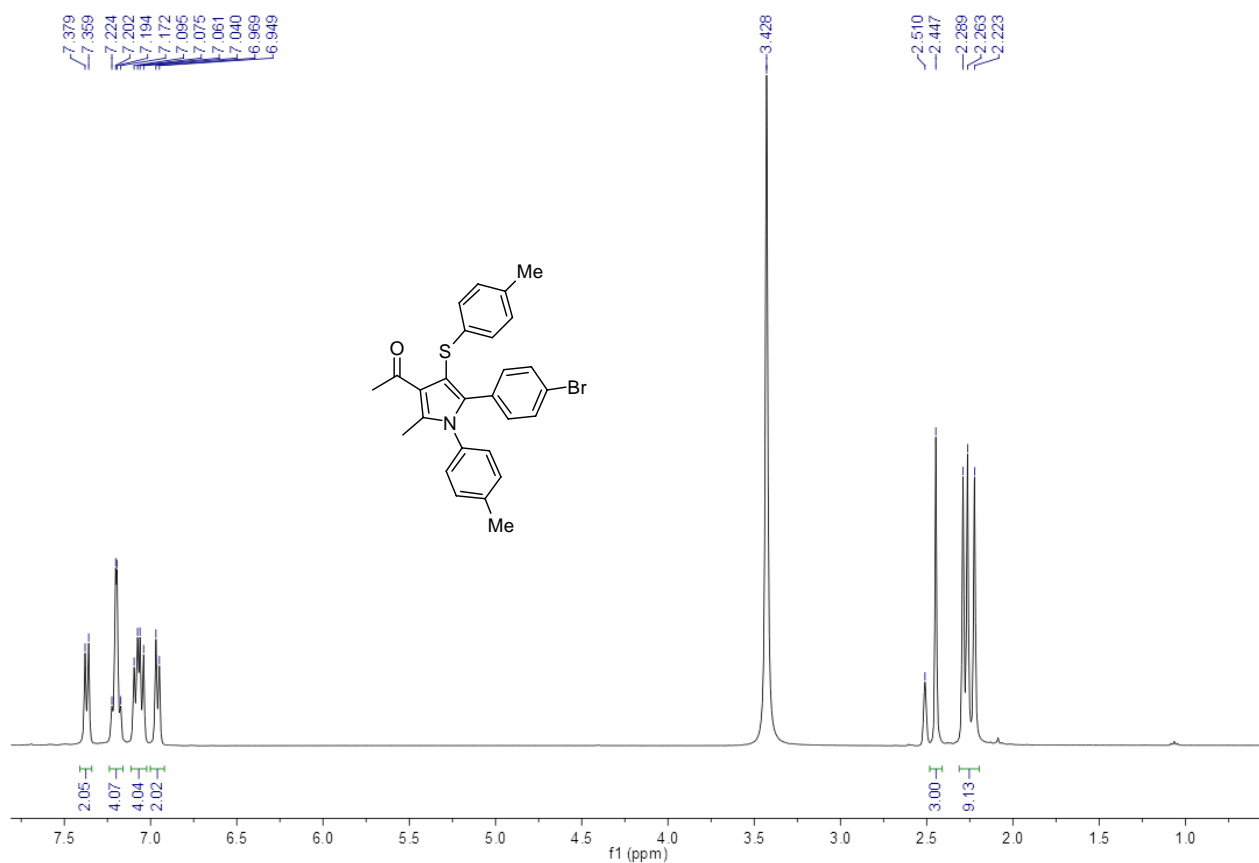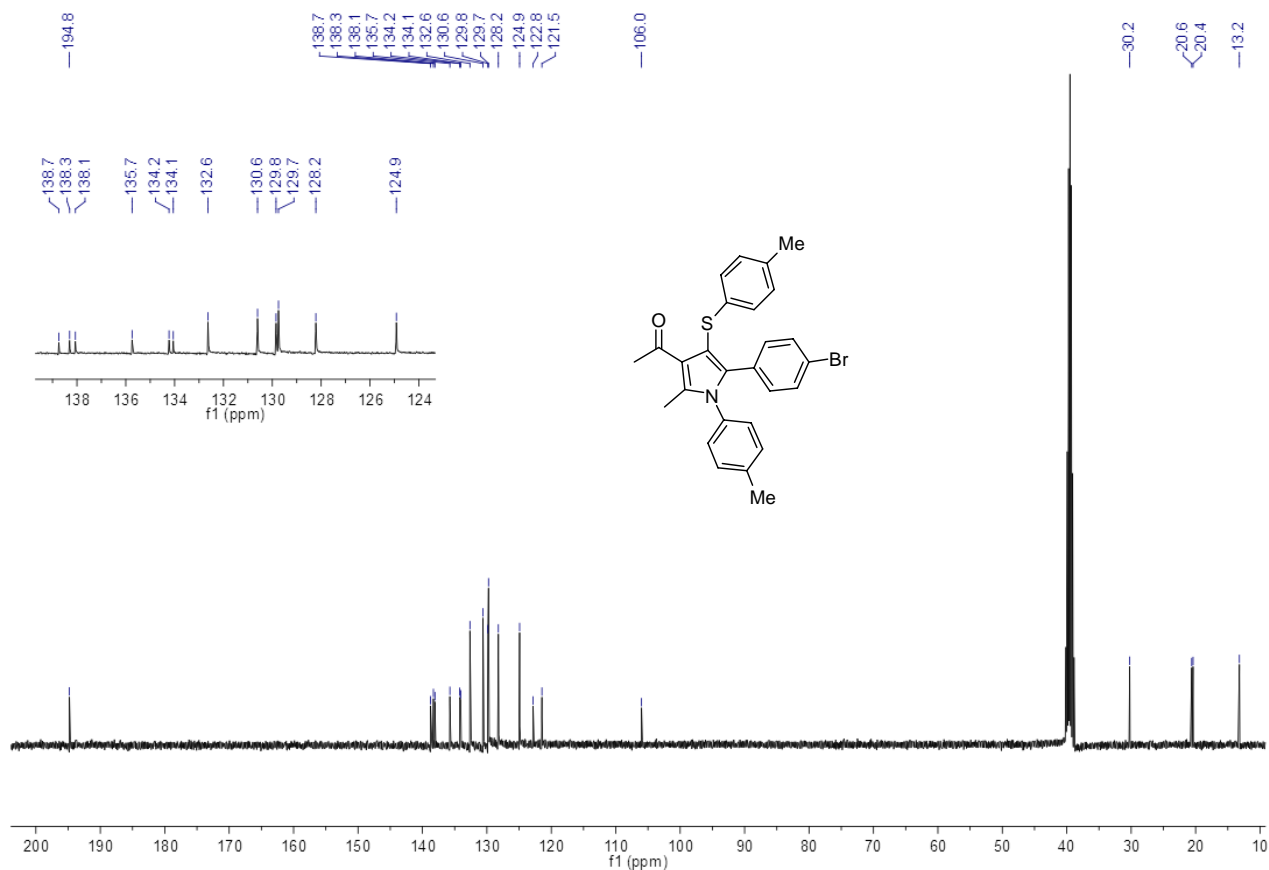

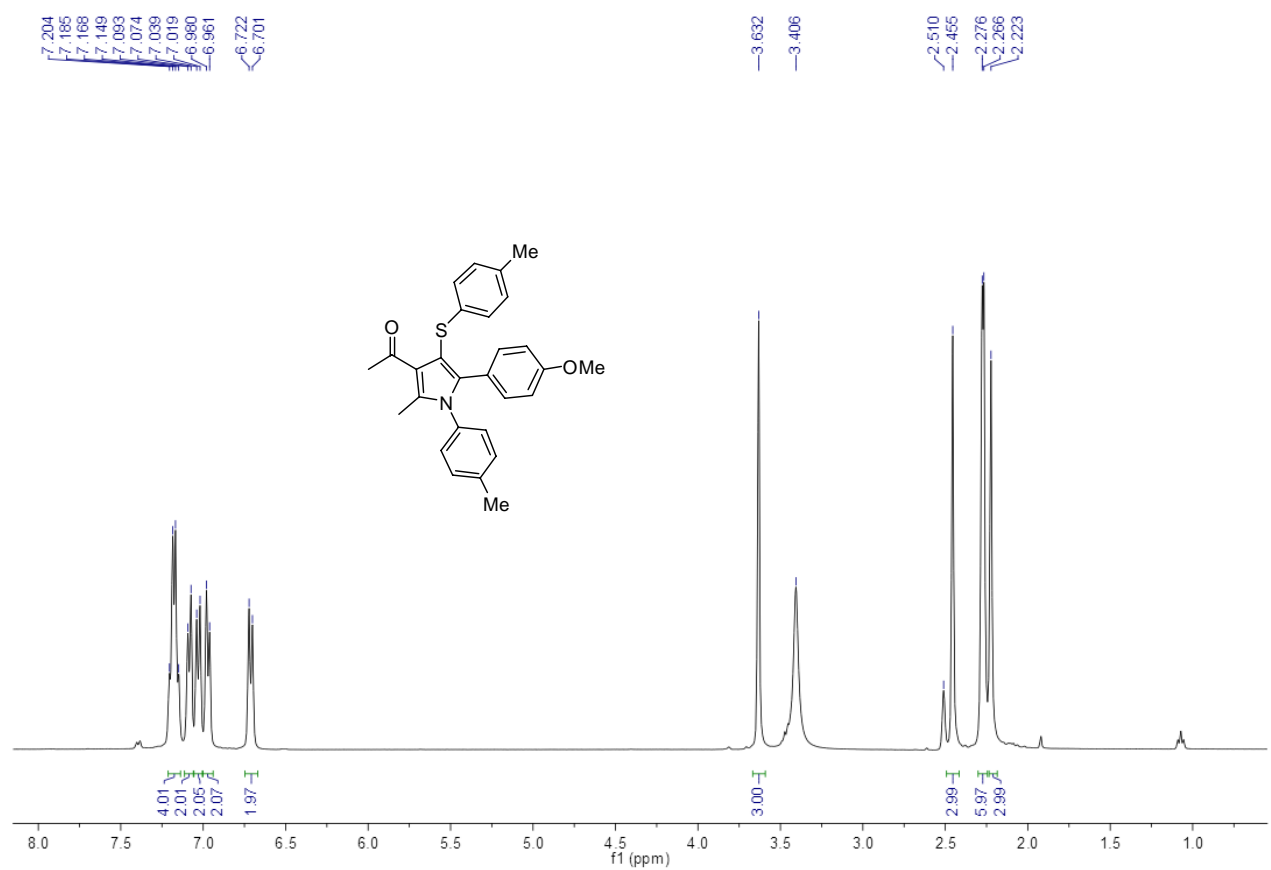

<sup>1</sup>H NMR Spectrum of Compound 6t

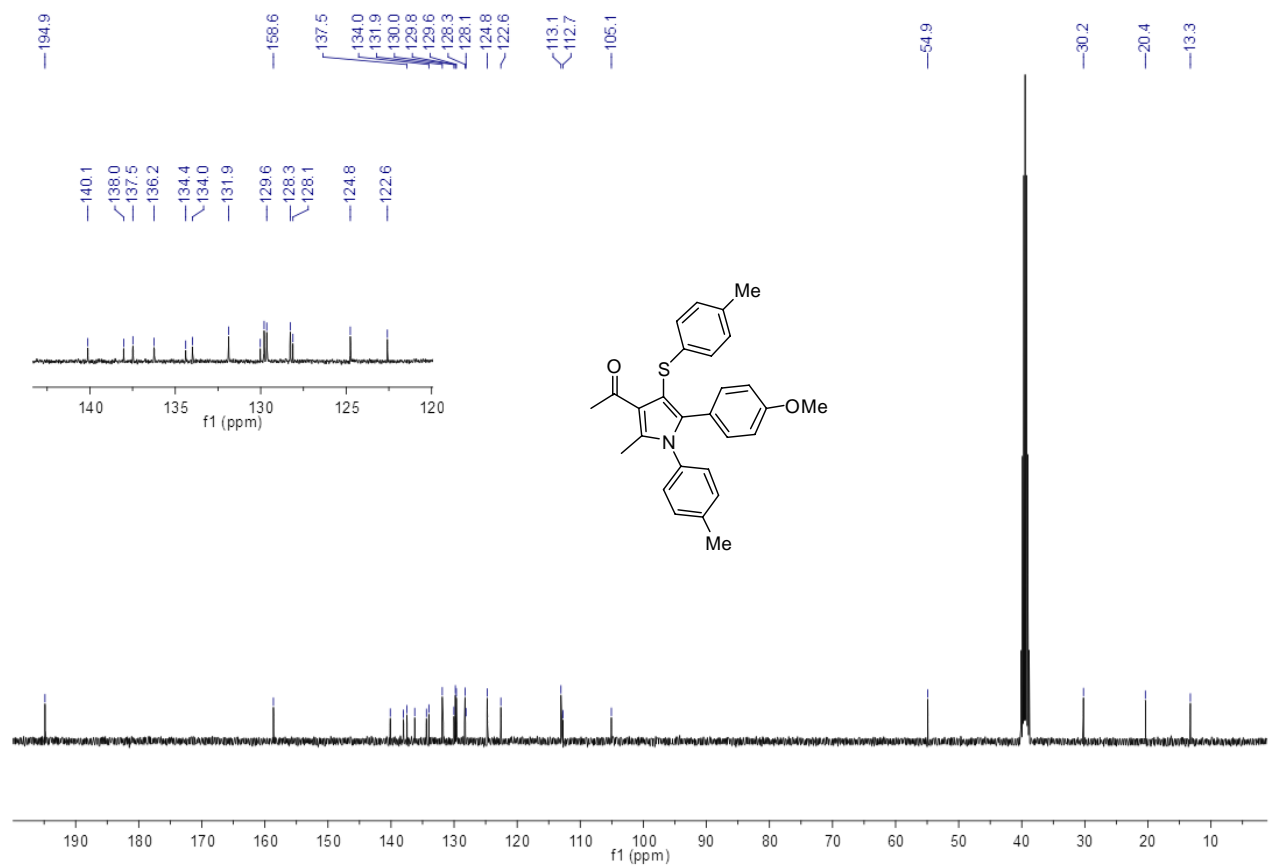

<sup>13</sup>C NMR Spectrum of Compound 6t

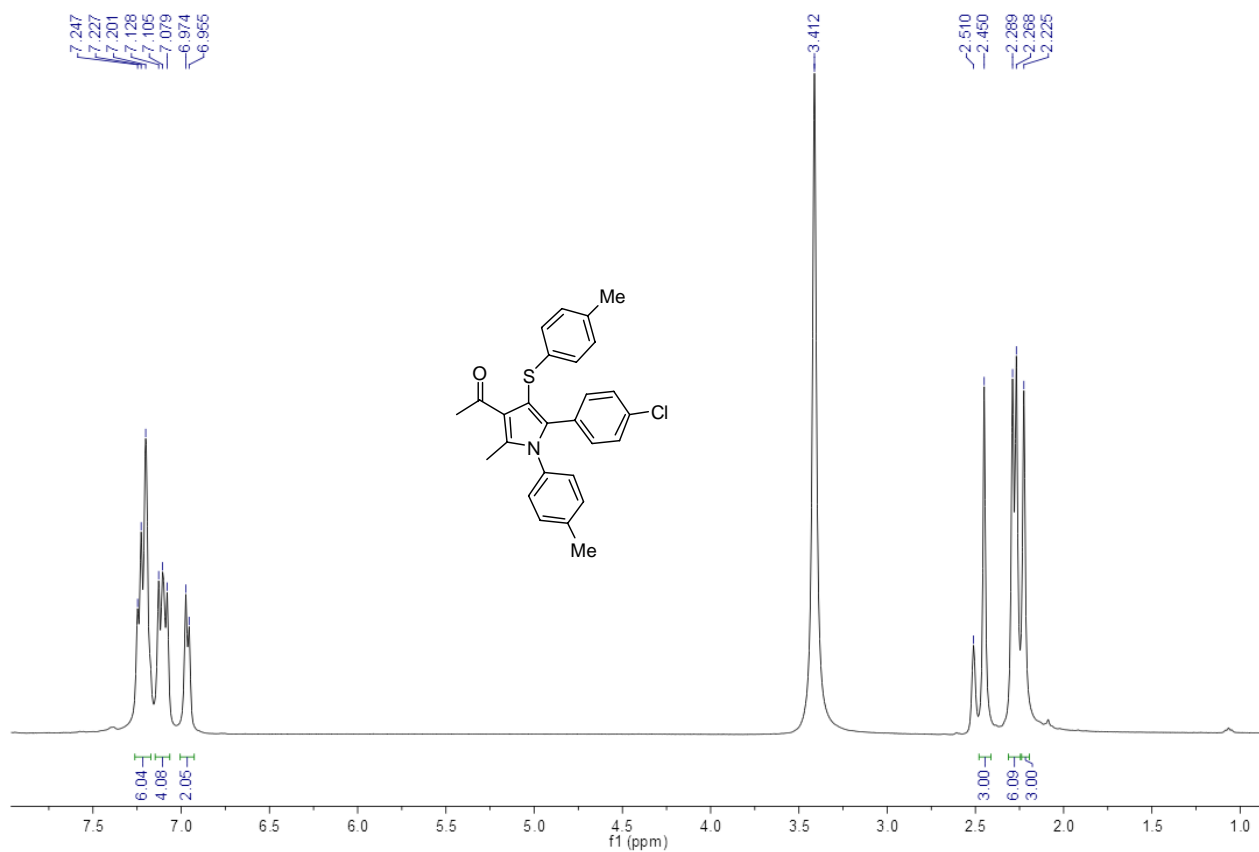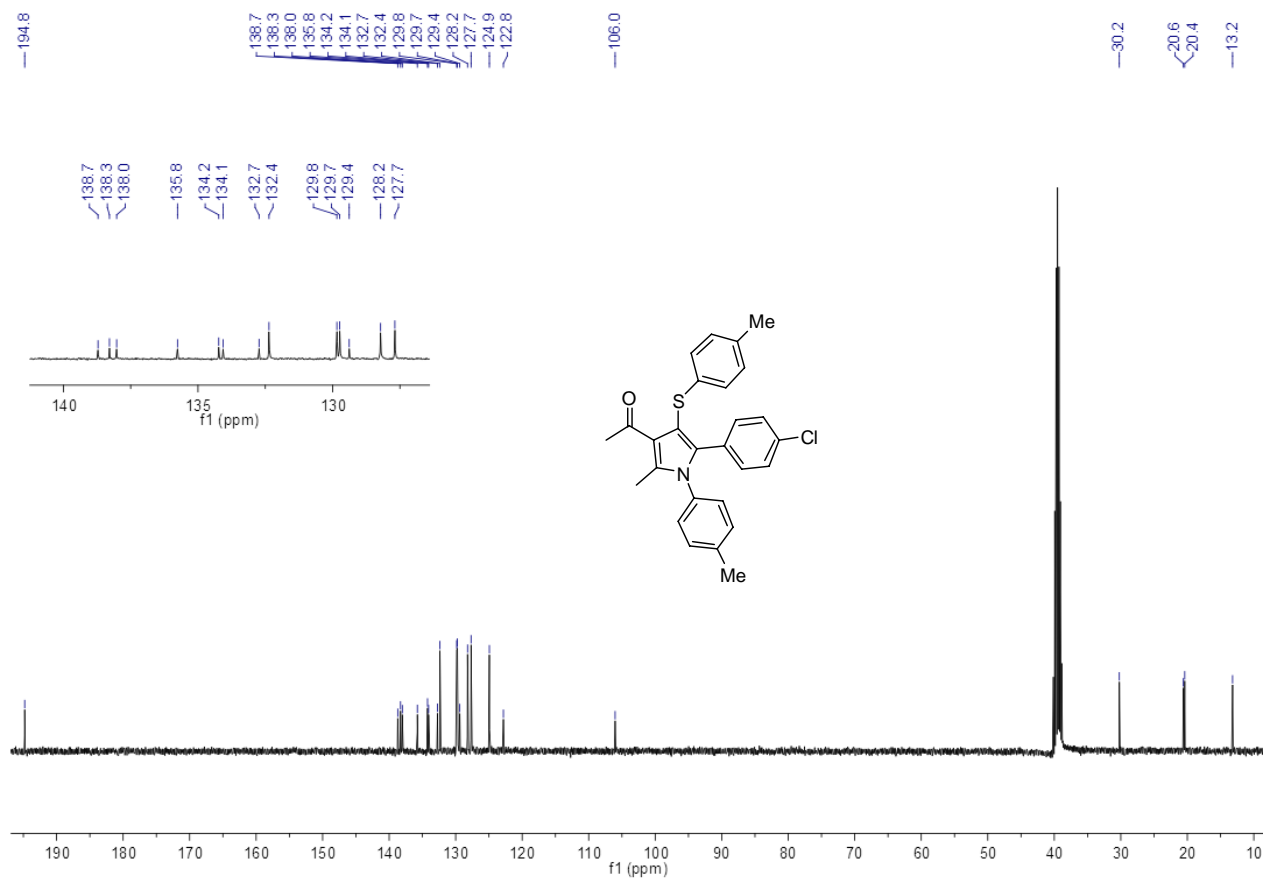

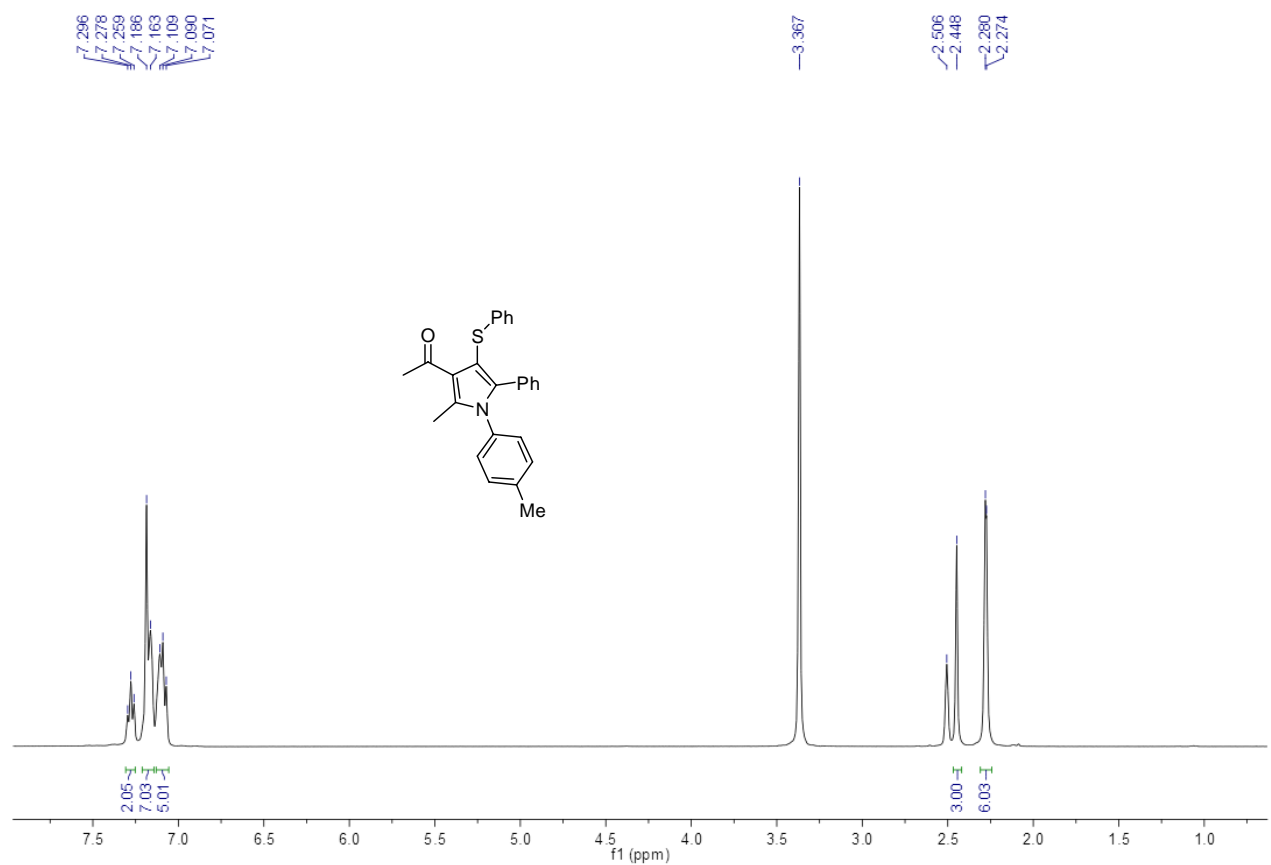

<sup>1</sup>H NMR Spectrum of Compound 6v

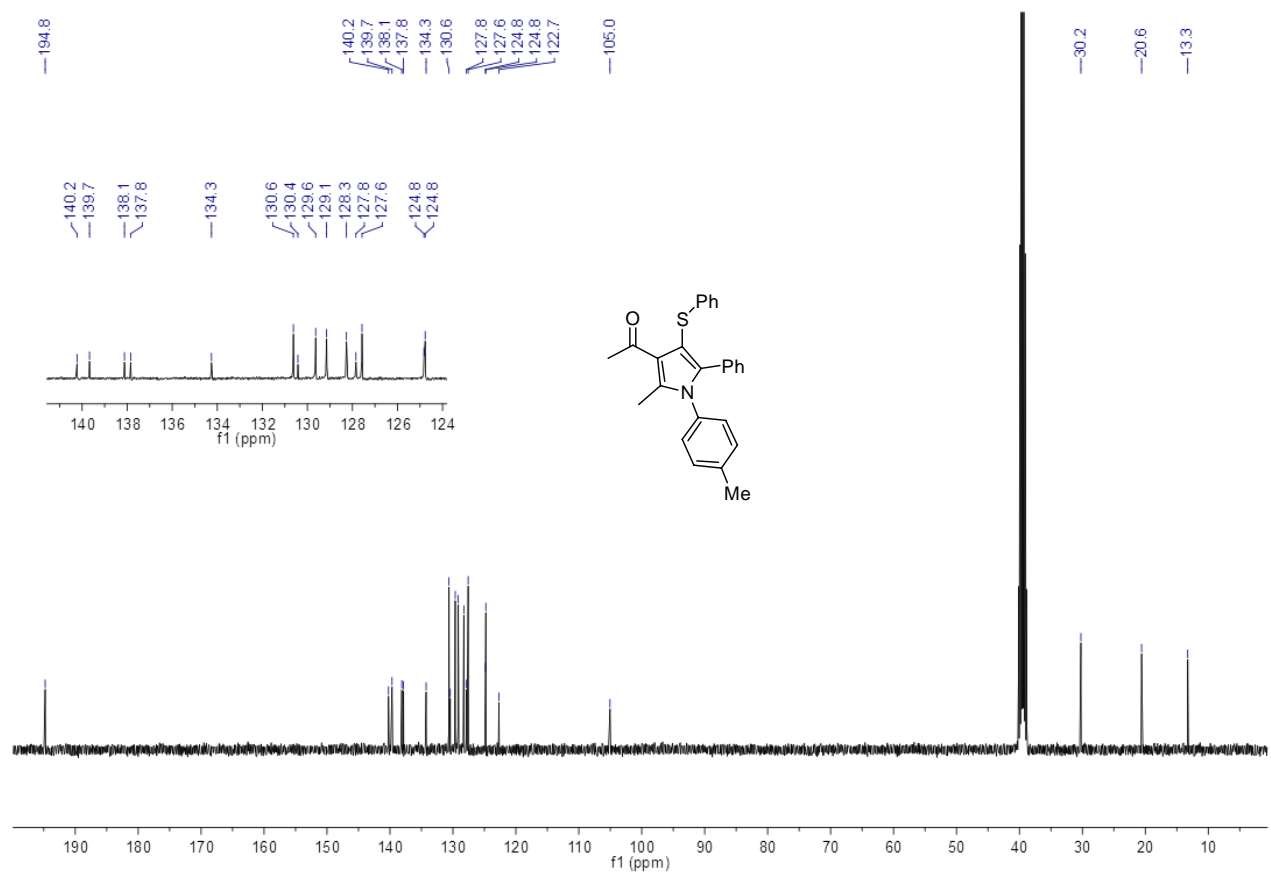

<sup>13</sup>C NMR Spectrum of Compound 6v

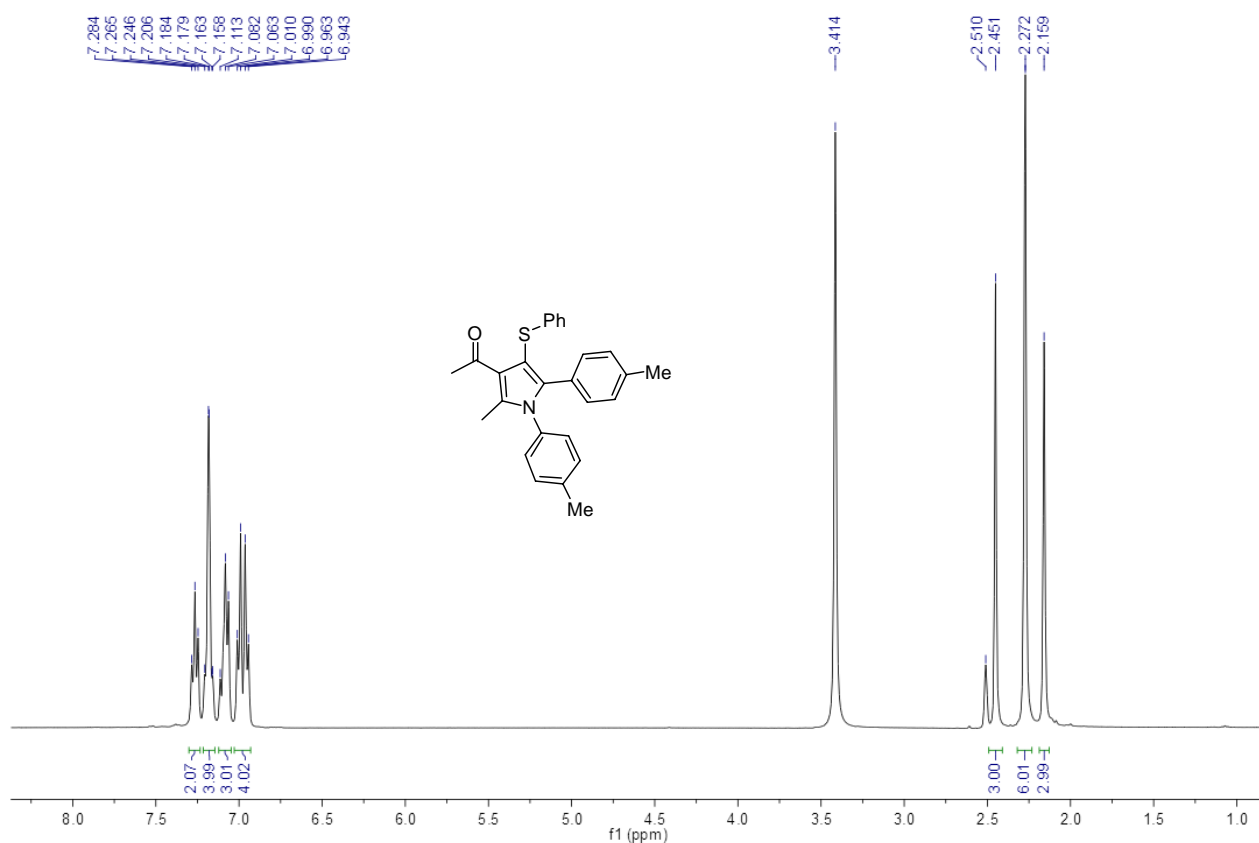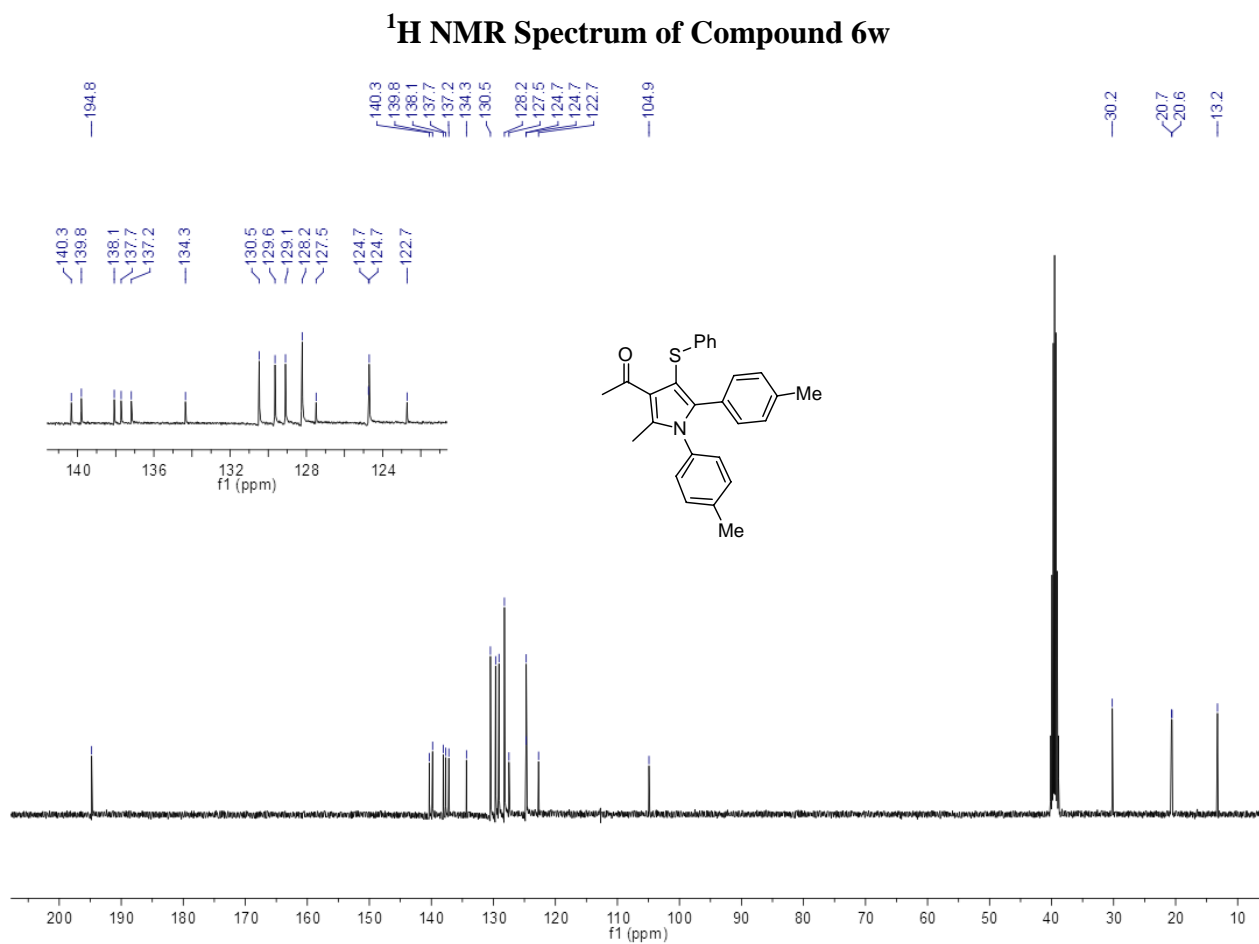



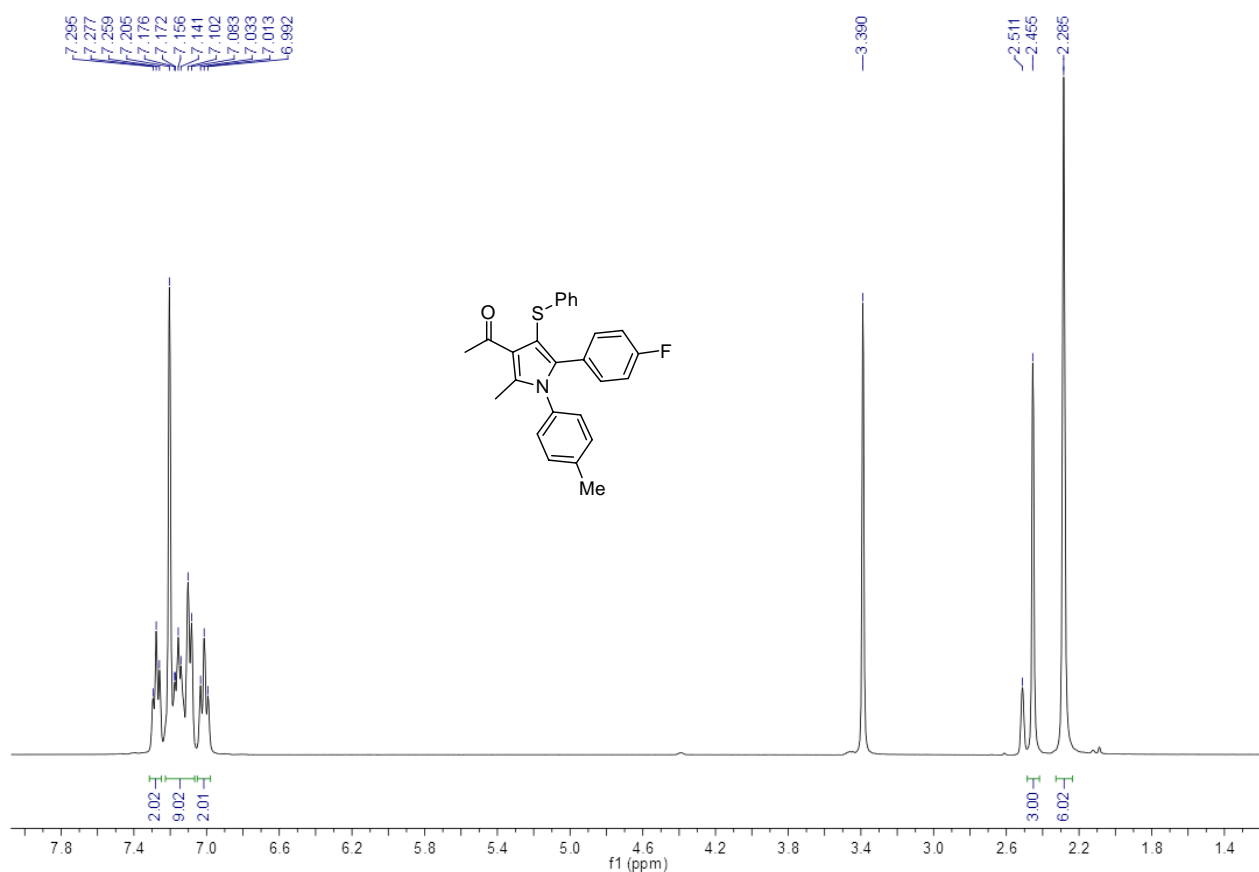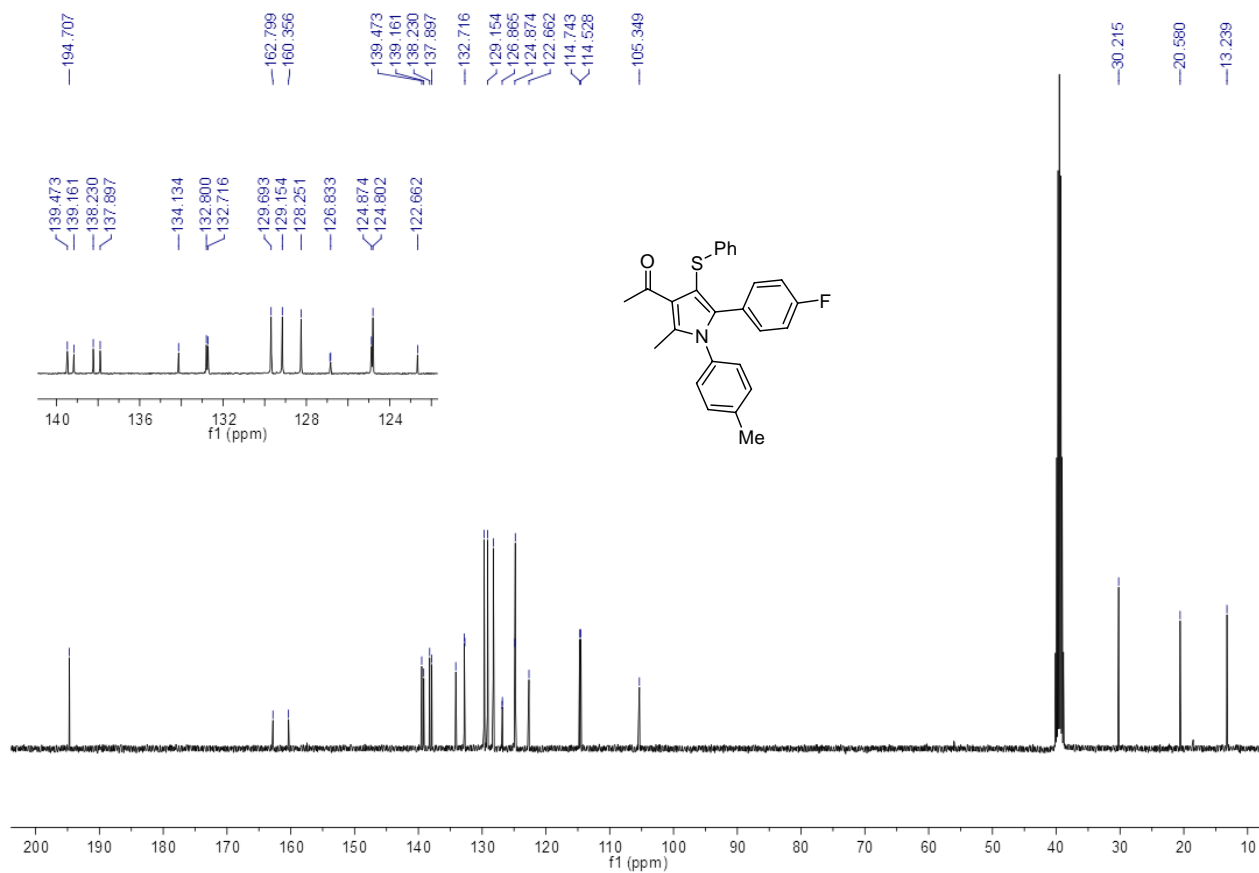

**<sup>13</sup>C NMR Spectrum of Compound 6x**

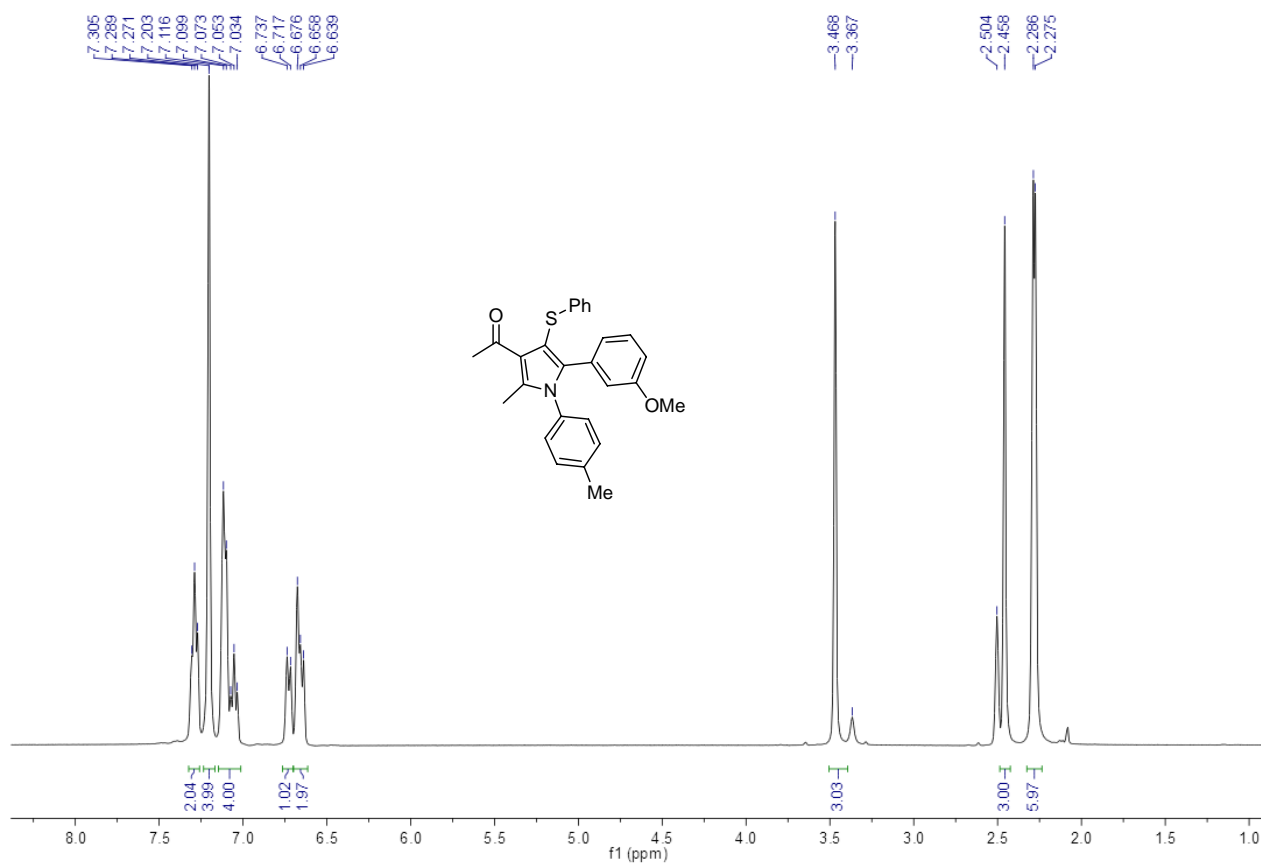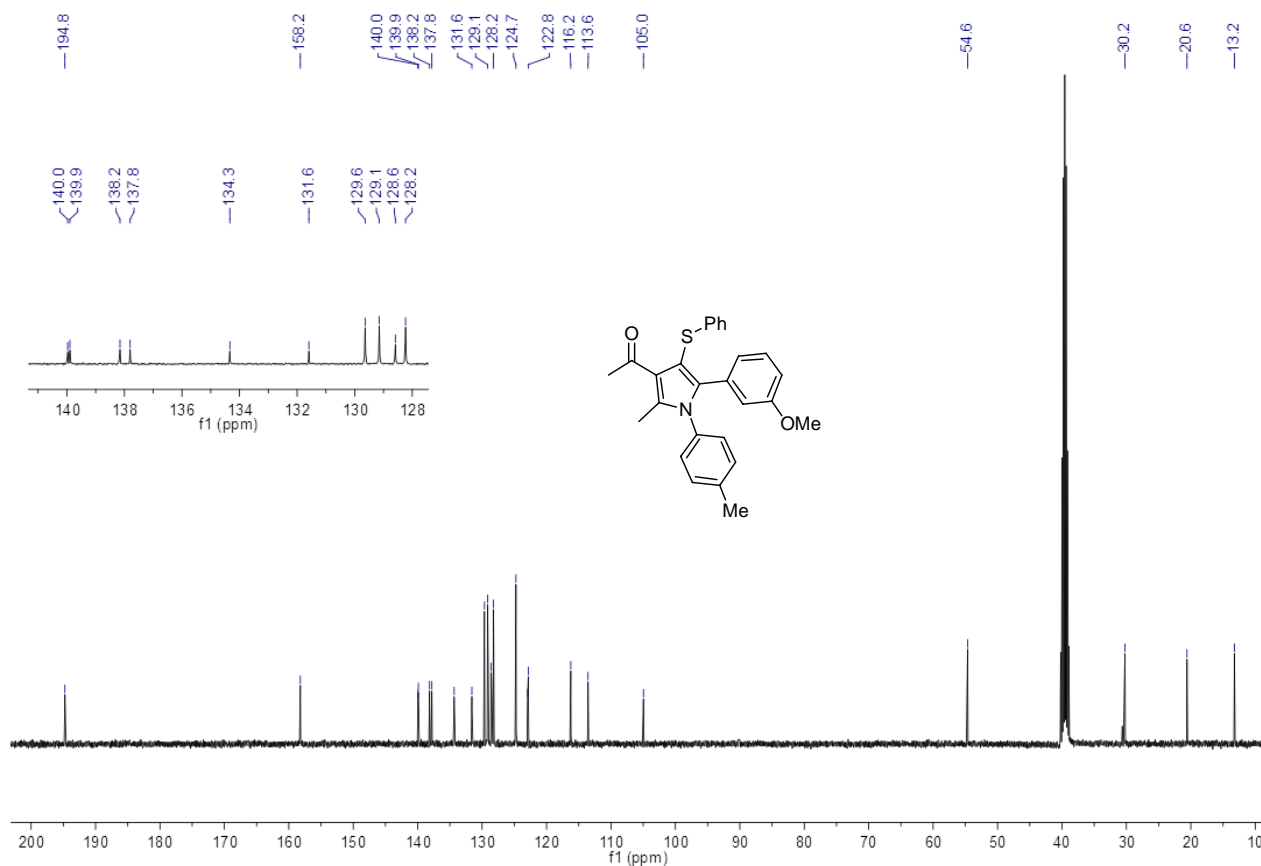

**<sup>13</sup>C NMR Spectrum of Compound 6y**  
S50

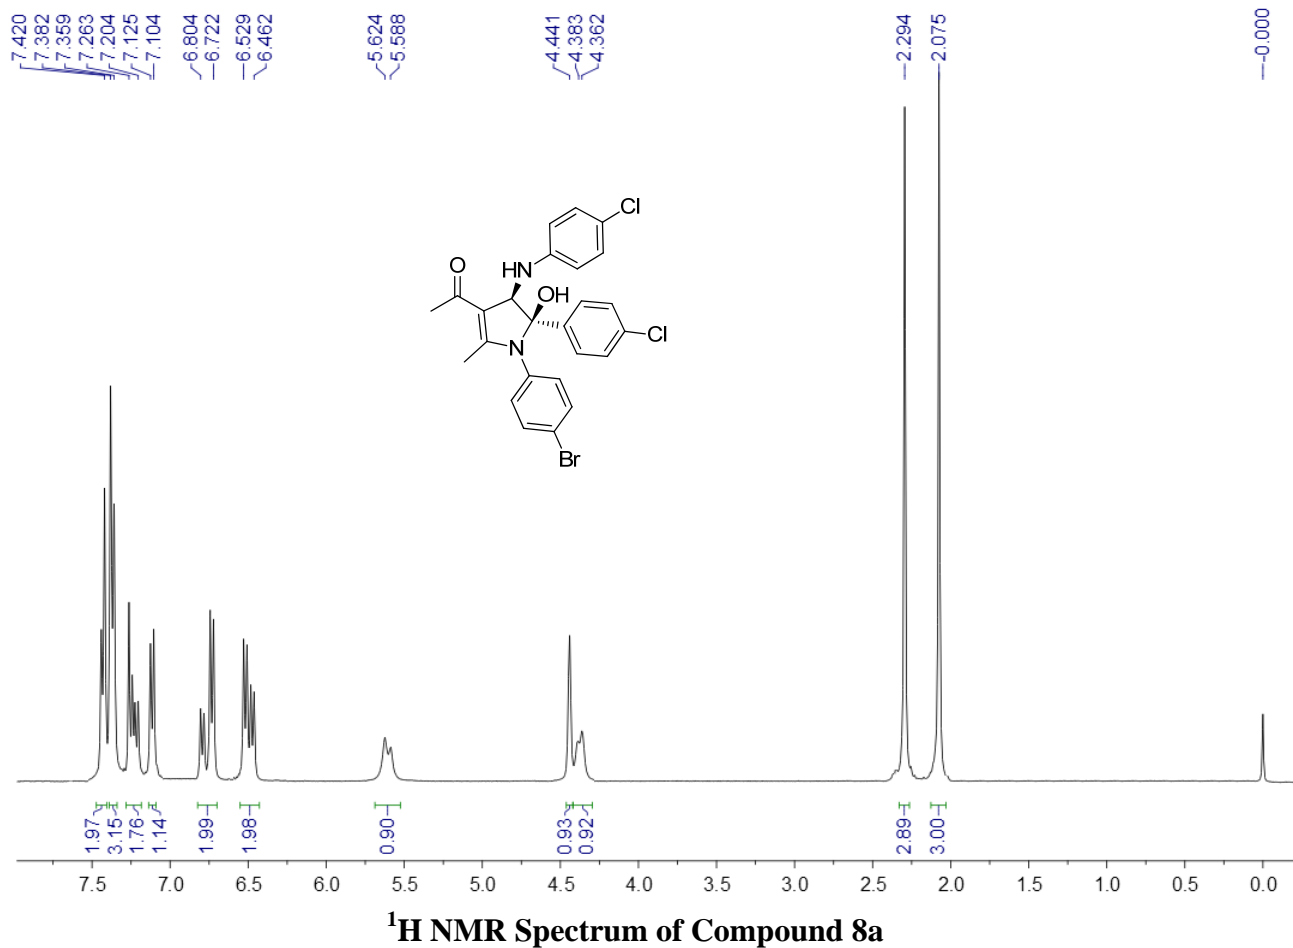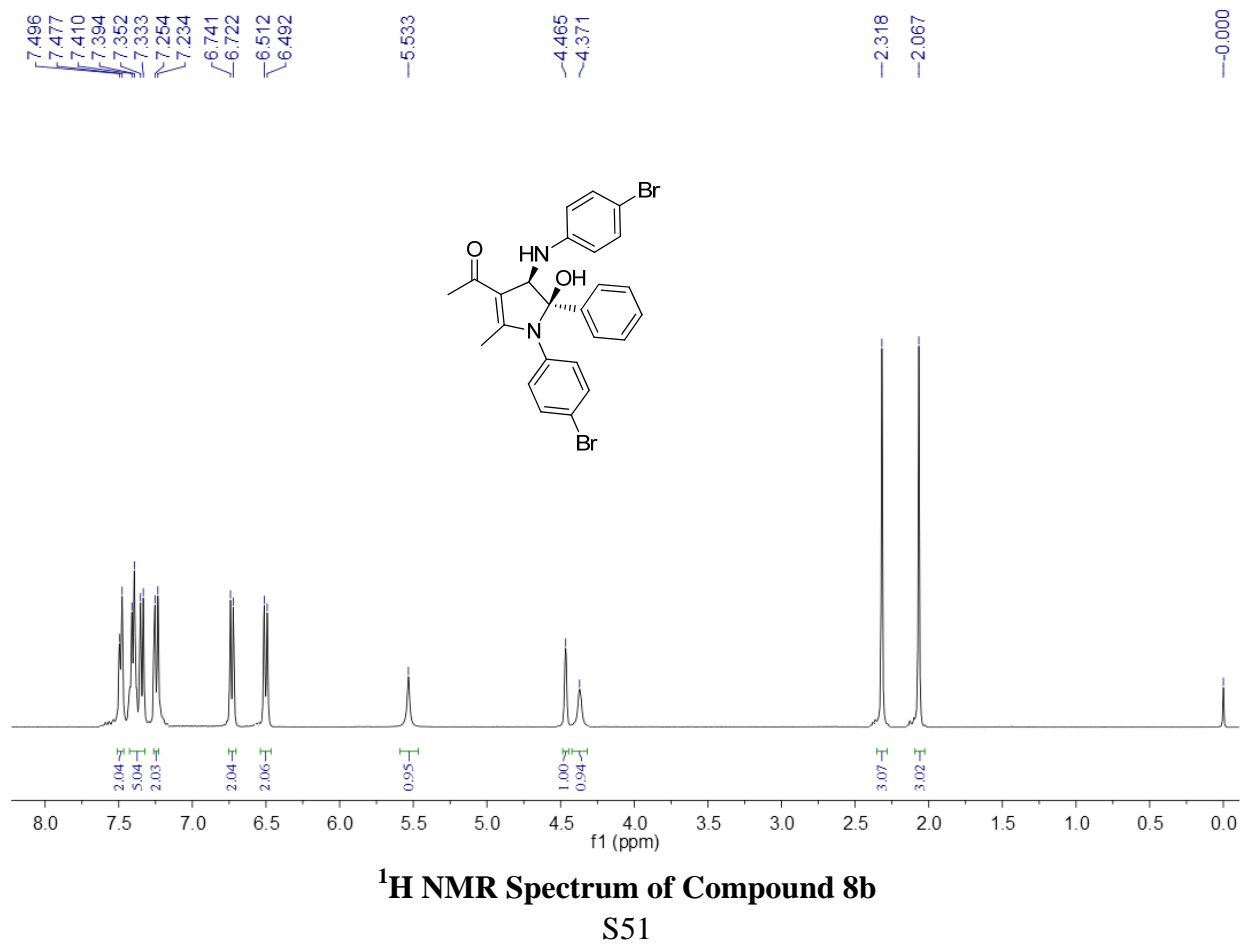

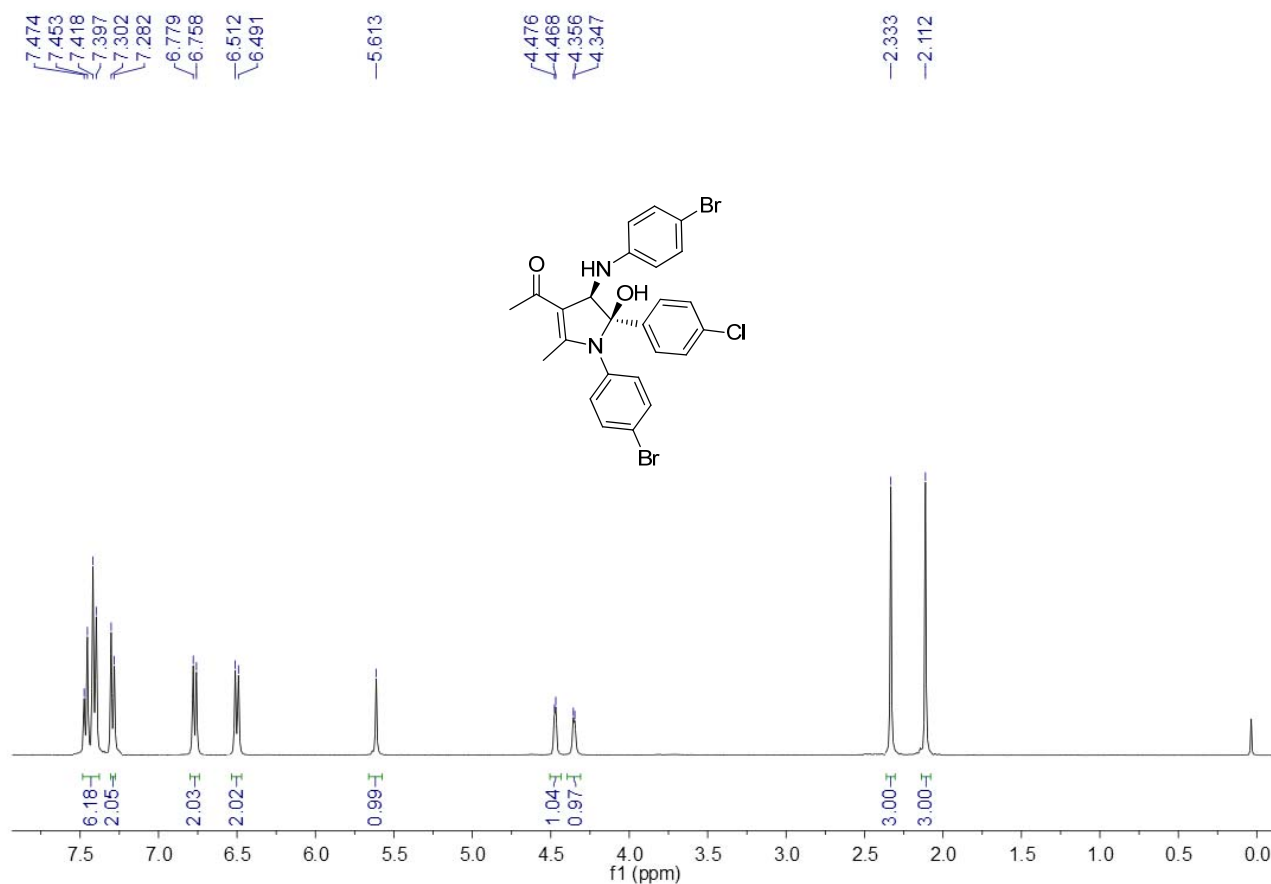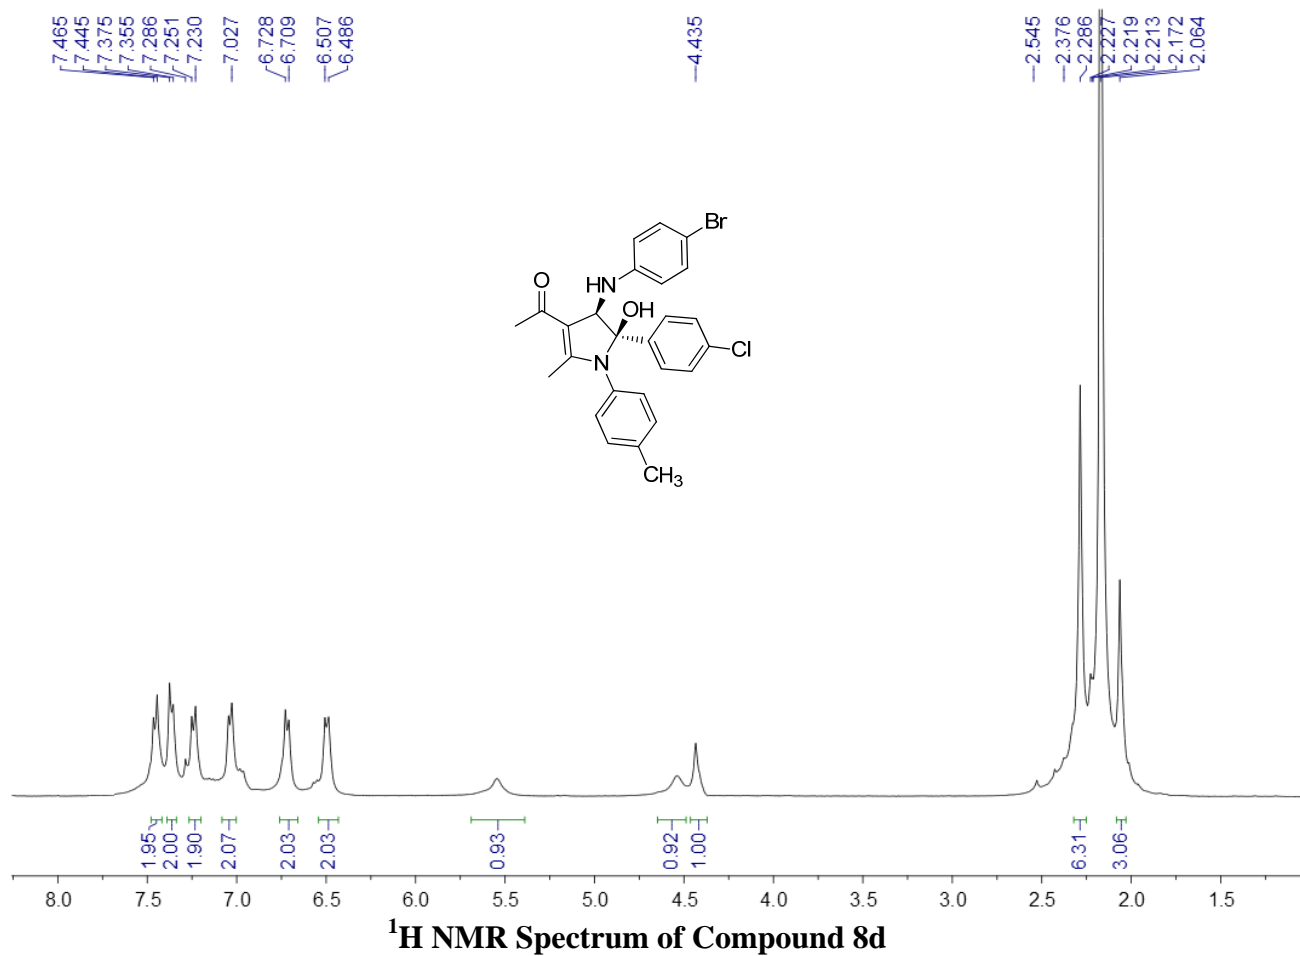

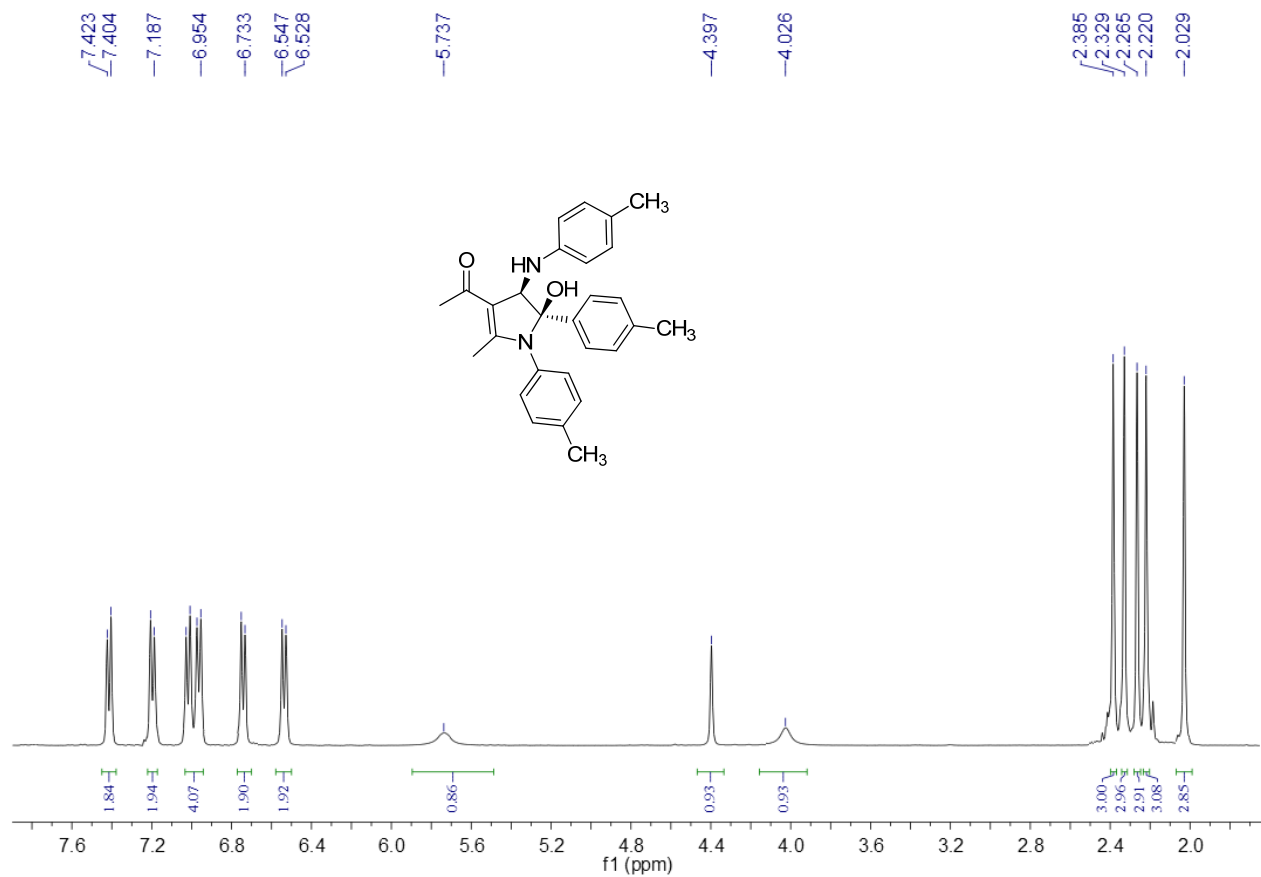

**<sup>1</sup>H NMR Spectrum of Compound 8e**
